# Supplementary material
Source: publisher figshare collection journal article supplement (https://gsajournals.figshare.com/ndownloader/files/23514857)
Supplement: Supplementary file 1 [file 23514857]

## Sheet: table_mc5000_sorted.biom_w_taxo
OTU ID	ERR1307272	ERR1307273	ERR1307274	ERR1307275	ERR1307278	ERR1307284	ERR1307286	ERR1307287	ERR1307288	ERR1307290	ERR1307291	ERR1307292	ERR1307337	ERR1307338	ERR1307339	ERR1307341	ERR1307342	ERR1307343	ERR1307344	ERR1307345	ERR1307346	ERR1307347	ERR1307348	Phylum	Class	Order	Family	Genus	Commonality
OTU_01	73	160	3624	1781	482	12645	88901	290238	9194	65179	372	27	32	67	57	20	8	65	21	1016	1577	745	1792	p__Proteobacteria	c__Gammaproteobacteria	o__Enterobacteriales	f__Enterobacteriaceae	g__	1
OTU_02	41773	17846	35233	234	9346	78094	662	1653	1028	1616	485	112	19	36	760	198	474	242	5	109	155	12	20	p__Proteobacteria	c__Gammaproteobacteria	o__Pseudomonadales	f__Moraxellaceae	g__Acinetobacter	1
OTU_04	363	36385	1958	49462	97	913	957	2172	94354	331	70	6	18	28	38	73	12	794	103	83	91	73	51	p__Proteobacteria	c__Gammaproteobacteria	o__Xanthomonadales	f__Xanthomonadaceae	g__	1
OTU_03	3927	2693	3442	41	1261	9442	105	286	162	167	49	23	82770	45	507	14	7	37	66721	86	9	11	12931	p__Proteobacteria	c__Alphaproteobacteria	o__Sphingomonadales	f__Sphingomonadaceae	g__Sphingomonas	1
OTU_10	50	185	4301	284	170	11583	902	2049	173	78543	86	3	5	13	9	36	2	91	3	166	5	37	12	p__Proteobacteria	c__Alphaproteobacteria	o__Rhizobiales	f__Brucellaceae	g__Ochrobactrum	1
OTU_09	4	71758	8	93	19	122	4	11	19	53	142	2	3	2	14	6	3	658	166	45	25	35	29	p__Proteobacteria	c__Gammaproteobacteria	o__Xanthomonadales	f__Xanthomonadaceae	g__Stenotrophomonas	1
OTU_05	8	62	2702	9	619	62	17	276	2	58	47558	5	3	3	5	2	2	6	2	429	817	217	347	p__Proteobacteria	c__Gammaproteobacteria	o__Pseudomonadales	f__Pseudomonadaceae	g__Pseudomonas	1
OTU_06	27	9	53	4	3	297	4	15	2169	803	1681	3	3	8	13	13731	25516	145	2	105	34	3	18	p__Proteobacteria	c__Gammaproteobacteria	o__Pseudomonadales	f__Pseudomonadaceae	g__	1
OTU_07	109	55	199	37161	65	428	120	177	39	318	27	31	4	472	15	75	32	20	231	220	88	16	15	p__Proteobacteria	c__Betaproteobacteria	o__Burkholderiales	f__Comamonadaceae	g__	1
OTU_08	21	6	63	16	200	6240	42	63	13	137	116	4	14	13	38	15	5	22	13	140	89	37	127	p__Proteobacteria	c__Gammaproteobacteria	o__Enterobacteriales	f__Enterobacteriaceae	g__Erwinia	1
OTU_11	2	3	13	2	5	334	2	7	5	2627	3	6	269	38	23	21	113	894	11	925	1075	284	602	p__Bacteroidetes	c__Sphingobacteriia	o__Sphingobacteriales	f__Sphingobacteriaceae	g__Sphingobacterium	1
OTU_12	2	9	111	10	87	164	2713	160	22	119	13	6	7	24	755	2	55	17	85	285	671	132	267	p__Bacteroidetes	c__Flavobacteriia	o__Flavobacteriales	f__[Weeksellaceae]	g__Chryseobacterium	1
OTU_13	106	36	22	3	14105	236	3	6	3	90	1603	2	3	4	4	46	73	5	3	1	32	13	2	p__Actinobacteria	c__Actinobacteria	o__Actinomycetales	f__Nocardiaceae	g__Rhodococcus	0.956522
OTU_14	34	10	51	43	10	242	3	4	2	2439	77	2	2	3	0	152	139	2	2	562	850	29	305	p__Proteobacteria	c__Betaproteobacteria	o__Burkholderiales	f__Comamonadaceae	g__Comamonas	0.956522
OTU_15	2	2	6	2	35	1047	4	2	6	3	5	4	2	8	2	2	3	2	2	0	2	4	2	p__Proteobacteria	c__Alphaproteobacteria	o__Rhodospirillales	f__Acetobacteraceae		0.956522
OTU_16	888	113	350	11	107	2033	23	110	14297	1168	95577	0	0	4	174	725	2585	543	226	827	1726	336	718	p__Proteobacteria	c__Gammaproteobacteria	o__Pseudomonadales	f__Pseudomonadaceae	g__Pseudomonas	0.913043
OTU_17	98	28	222	4	73	1424	94	180	315	252	13972	0	2	1	6	67	129	558	140	675	1246	574	1137	p__Proteobacteria	c__Gammaproteobacteria	o__Pseudomonadales	f__Pseudomonadaceae	g__Pseudomonas	0.913043
OTU_18	580	523	729	5	52	1640	9	36	19	43	8	1	2268	110	269	2	0	4	6	137	64	43	2739	p__Actinobacteria	c__Actinobacteria	o__Actinomycetales	f__Micrococcaceae	g__Renibacterium	0.913043
OTU_19	1613	629	1533	15	459	2635	34	138	40	494	16	0	0	19	20	269	411	35	145	56	103	82	126	p__Proteobacteria	c__Betaproteobacteria	o__Burkholderiales	f__Comamonadaceae	g__	0.913043
OTU_20	127	1645	134	658	7	31	30	57	2408	23	96	2	0	9	4	2	2	22	0	14	12	10	7	p__Proteobacteria	c__Gammaproteobacteria	o__Xanthomonadales	f__Xanthomonadaceae	g__	0.913043
OTU_21	87	64	55	4	33	178	2	8	3	13	2	5	1322	5	611	27	0	2	1197	1	2	4	251	p__Proteobacteria	c__Alphaproteobacteria	o__Sphingomonadales	f__Sphingomonadaceae	g__	0.913043
OTU_22	2756	1448	2326	51	922	4420	63	221	86	313	19	0	0	11	0	16	114	17	315	170	202	80	150	p__Proteobacteria	c__Betaproteobacteria	o__Burkholderiales	f__Comamonadaceae	g__	0.869565
OTU_23	1587	261	3643	6	421	1781	50	251	36	1327	78	0	1	0	549	5	6	51	23	102	245	48	98	p__Proteobacteria	c__Gammaproteobacteria	o__Pseudomonadales	f__Pseudomonadaceae	g__Pseudomonas	0.869565
OTU_24	136	83	304	49	258	303	54	3029	45	108	79	1	0	51	25	20	79	1	14	28	34	26	14	p__Proteobacteria	c__Gammaproteobacteria	o__Enterobacteriales	f__Enterobacteriaceae	g__	0.869565
OTU_25	484	220	367	9	85	969	8	20	8	83	9	3	13	9	447	195	399	39	0	0	6	0	2	p__Proteobacteria	c__Gammaproteobacteria	o__Pseudomonadales	f__Moraxellaceae	g__Acinetobacter	0.869565
OTU_26	6	62	16	0	12	47	1	1	3	5	3	4	12	248	1981	98	88	3	2	3	4	5	7	p__Proteobacteria	c__Gammaproteobacteria	o__Pseudomonadales	f__Moraxellaceae	g__Acinetobacter	0.869565
OTU_27	1	3	27140	49	3216	2141	1908	428	5	35	25	1	2	3	5	1	1	4	2	78	84	19	65	p__Proteobacteria	c__Gammaproteobacteria	o__Enterobacteriales	f__Enterobacteriaceae	g__	0.826087
OTU_28	0	1	120	8	21	75	1	9	13	211	25	33	52	0	1596	2272	2850	528	431	4862	7453	2651	4481	p__Proteobacteria	c__Gammaproteobacteria	o__Pseudomonadales	f__Moraxellaceae	g__Acinetobacter	0.826087
OTU_29	13	1192	42	504	3	4	13	25	1007	4	1	1	2	1	2	6	0	19	3	4	4	2	3	p__Proteobacteria	c__Gammaproteobacteria	o__Xanthomonadales	f__Xanthomonadaceae	g__	0.826087
OTU_30	0	3	74	1	6	16	9	27	3	227	81	1	37	622	81	15	59	227	1	43	51	22	41	p__Proteobacteria	c__Betaproteobacteria	o__Burkholderiales	f__Comamonadaceae	g__	0.826087
OTU_31	32	24	1543	9303	184	427	349	945	10	111	17732	0	0	2	6	1	0	1241	1	5673	10387	3064	6182	p__Proteobacteria	c__Gammaproteobacteria	o__Enterobacteriales	f__Enterobacteriaceae	g__Erwinia	0.782609
OTU_32	10	19	338	81	34	3104	1178	3199	207	2286	317	0	0	10	5	1	0	44	1	287	549	569	1419	p__Proteobacteria	c__Gammaproteobacteria	o__Enterobacteriales	f__Enterobacteriaceae	g__	0.782609
OTU_33	19	4	7	1	8024	35	2	6	3	15	364	2	1	3	7	4	11	0	0	0	18	20	5	p__Actinobacteria	c__Actinobacteria	o__Actinomycetales	f__	g__	0.782609
OTU_34	56	28	70	77	24	160	3	18	1	66	0	0	0	510	0	27	107	646	78	70	63	9	16	p__Proteobacteria	c__Betaproteobacteria	o__Burkholderiales	f__Comamonadaceae	g__	0.782609
OTU_35	183	104	163	5	55	318	4	12	4	19	3	0	0	0	0	7	13	0	11	2	7	7	6	p__Proteobacteria	c__Betaproteobacteria	o__Burkholderiales	f__Comamonadaceae	g__	0.782609
OTU_36	22	4	275	0	2	24	8	36	0	158	8	0	3	0	4	5	15	1	2	12	29	2	20	p__Proteobacteria	c__Gammaproteobacteria	o__Pseudomonadales	f__Pseudomonadaceae	g__Pseudomonas	0.782609
OTU_37	0	0	13	15	5	62	3	9	3	125	3	0	0	5	0	4	5	208	94	11	16	16	13	p__Proteobacteria	c__Betaproteobacteria	o__Burkholderiales	f__Comamonadaceae	g__Delftia	0.782609
OTU_38	13	1390	941	1994	63	1549	40	239	885	1163	125785	1	0	1	1	3	0	445	0	146	202	90	52	p__Proteobacteria	c__Gammaproteobacteria	o__Xanthomonadales	f__Xanthomonadaceae	g__	0.73913
OTU_39	1	0	11	1	13	3318	8	170	3	1616	4	0	1	1	81	29	25	148	7	133	45	406	43	p__Actinobacteria	c__Actinobacteria	o__Actinomycetales	f__Microbacteriaceae	g__Leucobacter	0.73913
OTU_40	411	287	231	6	63	254	4	1	21	5	9	2	2293	1	16	1	2	0	1683	4	0	0	700	p__Proteobacteria	c__Alphaproteobacteria	o__Sphingomonadales	f__Sphingomonadaceae	g__Sphingomonas	0.73913
OTU_41	0	0	174	1	23	20	2	92	0	104	1	2	1	346	3	9	59	13	190	965	1528	405	575	p__Bacteroidetes	c__Flavobacteriia	o__Flavobacteriales	f__Flavobacteriaceae	g__Flavobacterium	0.73913
OTU_42	3	2	92	6	1	19	4	4	0	325	1597	0	0	7	0	18	11	2	1	56	72	4	27	p__Proteobacteria	c__Betaproteobacteria	o__Burkholderiales	f__Comamonadaceae		0.73913
OTU_43	25	6	12	0	0	44	1	6	261	33	1109	0	70	0	1	165	293	10	2	15	32	6	21	p__Proteobacteria	c__Gammaproteobacteria	o__Pseudomonadales	f__Pseudomonadaceae	g__Pseudomonas	0.73913
OTU_44	2	2	14	3	2	157	49	218	5	73	3	1	0	3	0	1	1	2	1	5	3	4	9	p__Proteobacteria	c__Gammaproteobacteria	o__Enterobacteriales	f__Enterobacteriaceae	g__Trabulsiella	0.73913
OTU_45	0	0	3	3	3	180	0	0	0	7	15	3	5	7	9	6	1	10	2	14	19	9	18	p__Proteobacteria	c__Gammaproteobacteria	o__Enterobacteriales	f__Enterobacteriaceae		0.73913
OTU_46	4	3	48	1	12	32	15	19	1	343	7	0	0	0	1	2	58	13	1	1149	1604	143	605	p__Proteobacteria	c__Gammaproteobacteria	o__Pseudomonadales	f__Pseudomonadaceae	g__Pseudomonas	0.695652
OTU_47	103	59	115	1	23	638	3	10	4	6	3	135	1078	2	4	1	0	0	811	1	0	0	280	p__Proteobacteria	c__Alphaproteobacteria	o__Sphingomonadales	f__Sphingomonadaceae	g__Sphingomonas	0.695652
OTU_48	342	157	1363	7	120	727	69	213	18	102	8	1	1	0	9	1	10	3	1	1	5	0	3	p__Proteobacteria	c__Gammaproteobacteria	o__Pseudomonadales	f__Moraxellaceae	g__Acinetobacter	0.695652
OTU_49	4	1	2	2	0	336	1	5	2	41	2	0	0	0	0	255	566	386	22	163	118	38	46	p__Proteobacteria	c__Alphaproteobacteria	o__Rhodobacterales	f__Rhodobacteraceae	g__Rhodobacter	0.695652
OTU_50	0	0	2	1140	1	12	4	7	3	9	1	1	1	26	2	4	1	14	12	17	5	5	3	p__Proteobacteria	c__Betaproteobacteria	o__Burkholderiales	f__Comamonadaceae		0.695652
OTU_51	0	6	7	4	10	576	8	9	0	276	8	0	0	0	0	6	0	67	4	109	64	17	6	p__Proteobacteria	c__Betaproteobacteria	o__Burkholderiales	f__Alcaligenaceae	g__	0.695652
OTU_52	59	30	62	0	22	193	1	6	2	16	0	0	0	0	64	3	3	0	19	8	11	7	13	p__Proteobacteria	c__Betaproteobacteria	o__Burkholderiales	f__Comamonadaceae		0.695652
OTU_53	1	2	10	2	25	327	8	4	3	1	7	0	2	4	5	1	1	2	4	0	2	3	0	p__Proteobacteria	c__Alphaproteobacteria	o__Rhodospirillales	f__Acetobacteraceae	g__Gluconobacter	0.695652
OTU_54	8	13	21	9	238084	25	9	16	7	14	21	1	1	1	1	0	0	2	1	32	1	8	39	p__Actinobacteria	c__Actinobacteria	o__Actinomycetales	f__Micrococcaceae	g__	0.652174
OTU_55	3	1	12	3	1	45	1	4	1	913	3	1	1	1	62	705	635	3	0	9072	12308	2446	6253	p__Proteobacteria	c__Gammaproteobacteria	o__Pseudomonadales	f__Moraxellaceae	g__Acinetobacter	0.652174
OTU_56	39	5	4463	15	79	544	261	902	66	304	23	0	0	0	0	0	0	0	0	7	7	2	7	p__Proteobacteria	c__Gammaproteobacteria	o__Pseudomonadales	f__Moraxellaceae	g__Acinetobacter	0.652174
OTU_57	474	35	846	1	95	25	2	23	6	955	1520	0	0	0	9	0	0	1	0	45	105	22	70	p__Proteobacteria	c__Gammaproteobacteria	o__Pseudomonadales	f__Pseudomonadaceae	g__	0.652174
OTU_58	0	0	25	0	38	8	1	4	1	497	0	153	164	2	935	0	91	1767	61	316	1	28	64	p__Proteobacteria	c__Gammaproteobacteria	o__Pseudomonadales	f__Moraxellaceae	g__Enhydrobacter	0.652174
OTU_59	6	6	785	19	8	420	384	1326	46	422	12	0	0	0	0	0	0	0	0	92	102	51	183	p__Proteobacteria	c__Gammaproteobacteria	o__Enterobacteriales	f__Enterobacteriaceae	g__	0.652174
OTU_60	0	0	24	2	0	1475	0	6	2	214	0	0	4	5	0	108	57	0	352	26	22	3	24	p__Proteobacteria	c__Betaproteobacteria	o__Burkholderiales	f__Alcaligenaceae	g__Achromobacter	0.652174
OTU_61	6	2	551	113	9	214	268	701	17	297	10	0	0	0	0	0	0	0	0	13	18	3	25	p__Proteobacteria	c__Gammaproteobacteria	o__Enterobacteriales	f__Enterobacteriaceae	g__	0.652174
OTU_62	0	0	13	0	3	147	0	2	1	14	0	0	22	30	379	95	53	0	2	320	458	214	274	p__Proteobacteria	c__Gammaproteobacteria	o__Pseudomonadales	f__Moraxellaceae	g__Acinetobacter	0.652174
OTU_63	62	38	74	2	21	83	2	2	1	6	0	2	562	4	3	1	0	1	409	1	0	0	237	p__Proteobacteria	c__Alphaproteobacteria	o__Sphingomonadales	f__Sphingomonadaceae	g__Sphingomonas	0.652174
OTU_64	39	2	94	0	47	4	0	2	9	4	1204	0	1	0	2	0	2	1	0	9	9	2	12	p__Proteobacteria	c__Gammaproteobacteria	o__Pseudomonadales	f__Pseudomonadaceae	g__Pseudomonas	0.652174
OTU_65	18	5	15	0	25	101	1	5	16	3	0	2	0	1	674	0	3	70	97	2	5	0	0	p__Proteobacteria	c__Alphaproteobacteria	o__Rhizobiales	f__Methylobacteriaceae	g__	0.652174
OTU_66	1	3	35	2	9	533	6	103	3	82	10	0	1	3	1	1	25	8	70	3	0	1	0	p__Bacteroidetes	c__Sphingobacteriia	o__Sphingobacteriales	f__Sphingobacteriaceae	g__Pedobacter	0.652174
OTU_67	0	2	6	7	59	699	6	7	4	4	10	0	2	2	3	1	1	2	74	0	1	0	0	p__Proteobacteria	c__Alphaproteobacteria	o__Rhodospirillales	f__Acetobacteraceae	g__Acetobacter	0.652174
OTU_68	2	2	159	2	2	129	70	216	3	44	3	0	0	0	0	0	0	0	0	16	18	10	38	p__Proteobacteria	c__Gammaproteobacteria	o__Enterobacteriales	f__Enterobacteriaceae	g__	0.652174
OTU_69	13	0	69	1	2	8	0	28	259	16	134	0	0	0	0	4	4	2	0	13	86	3	9	p__Proteobacteria	c__Gammaproteobacteria	o__Pseudomonadales	f__Pseudomonadaceae	g__Pseudomonas	0.652174
OTU_70	14	43	17	2	3	13	1	1	0	3	0	0	0	18	4	1	5	0	21	49	30	268	15	p__Actinobacteria	c__Actinobacteria	o__Actinomycetales	f__Microbacteriaceae	g__Microbacterium	0.652174
OTU_71	0	0	0	0	0	65	0	4	0	7	0	6	5	11	14	3	3	10	4	3	3	58	3	p__Proteobacteria	c__Betaproteobacteria	o__Burkholderiales	f__Alcaligenaceae	g__Achromobacter	0.652174
OTU_72	21086	8882	20259	116	7103	31214	459	1388	617	1002	148	0	0	11	0	0	1	5	0	29	0	1	1	p__Proteobacteria	c__Betaproteobacteria	o__Burkholderiales	f__Comamonadaceae		0.608696
OTU_73	117	12	34	3	2	2	3	9	1599	3	4281	0	0	1	0	0	0	0	1	3	5	0	4	p__Proteobacteria	c__Gammaproteobacteria	o__Pseudomonadales	f__Pseudomonadaceae	g__	0.608696
OTU_74	2	2	625	59	4	164	189	604	31	499	5	0	0	0	0	0	0	0	0	4	7	1	20	p__Proteobacteria	c__Betaproteobacteria	o__Burkholderiales	f__Comamonadaceae	g__	0.608696
OTU_75	1	0	1	0	3	6	3	2	6	26	3	0	0	0	0	284	637	31	0	170	210	27	16	p__Proteobacteria	c__Gammaproteobacteria	o__Alteromonadales	f__[Chromatiaceae]	g__	0.608696
OTU_76	44	935	184	9	1	11	2	14	120	5	26	2	0	1	3	1	2	3	0	0	1	0	0	p__Proteobacteria	c__Gammaproteobacteria	o__Pseudomonadales	f__Moraxellaceae	g__Acinetobacter	0.608696
OTU_77	178	6	507	1	26	36	2	4	9	14	13	0	0	0	0	2	0	0	0	3	7	0	7	p__Proteobacteria	c__Betaproteobacteria	o__Burkholderiales	f__Comamonadaceae		0.608696
OTU_78	0	43	93	0	39	0	6	7	0	1	0	11	28	3	234	116	1	131	0	10	0	44	26	p__Bacteroidetes	c__Flavobacteriia	o__Flavobacteriales	f__[Weeksellaceae]	g__Cloacibacterium	0.608696
OTU_79	0	0	2	12	2	14	1	5	0	20	1	0	0	43	0	1	3	70	23	7	9	6	2	p__Proteobacteria	c__Betaproteobacteria	o__Burkholderiales	f__Comamonadaceae		0.608696
OTU_80	30	20	21	24	11	65	1	4	0	18	0	0	0	3	0	2	3	0	2	0	2	0	2	p__Proteobacteria	c__Betaproteobacteria	o__Burkholderiales	f__Comamonadaceae		0.608696
OTU_81	3	0	3	0	0	5	2	0	2	37	11	0	1	0	0	5	7	0	8	2	7	2	18	p__Proteobacteria	c__Gammaproteobacteria	o__Pseudomonadales	f__Pseudomonadaceae	g__	0.608696
OTU_82	2092	786	1714	6	537	2983	37	136	48	125	11	0	0	1	1	4	3	1	0	1	0	1	1	p__Proteobacteria	c__Betaproteobacteria	o__Burkholderiales	f__Comamonadaceae	g__Acidovorax	0.565217
OTU_83	0	0	2	0	1	190	0	3	1	5564	3	0	1	0	0	238	244	217	55	288	529	52	151	p__Proteobacteria	c__Gammaproteobacteria	o__Alteromonadales	f__Alteromonadaceae	g__Cellvibrio	0.565217
OTU_84	0	0	0	2	2	52	1	0	0	90	1	0	0	0	2	137	313	40	97	1244	2344	550	1690	p__Proteobacteria	c__Alphaproteobacteria	o__Rhodobacterales	f__Rhodobacteraceae	g__Rhodobacter	0.565217
OTU_85	1	9	103	209	2	69	326	1074	1658	2279	95	1	0	0	0	0	0	0	0	1	11	3	4	p__Proteobacteria	c__Gammaproteobacteria	o__Enterobacteriales	f__Enterobacteriaceae	g__	0.565217
OTU_86	2	8	12	8	43	2860	29	143	8	8	16	2	1	0	1	0	0	2	0	0	0	0	0	p__Firmicutes	c__Bacilli	o__Lactobacillales	f__Leuconostocaceae	g__Leuconostoc	0.565217
OTU_87	16	1	3	0	6	2466	6	59	2	267	2	0	0	0	0	1	0	0	31	39	3	2	0	p__Bacteroidetes	c__Sphingobacteriia	o__Sphingobacteriales	f__Sphingobacteriaceae	g__Pedobacter	0.565217
OTU_88	5	8	128	16	10	309	19	44	8	2087	8	1	1	0	2	0	1	0	0	1	0	2	0	p__Proteobacteria	c__Alphaproteobacteria	o__Rhizobiales	f__Brucellaceae	g__Ochrobactrum	0.565217
OTU_89	0	3	1	0	3	540	1	3	0	891	2	0	0	0	1	435	511	108	74	30	9	16	0	p__Bacteroidetes	c__Cytophagia	o__Cytophagales	f__Cytophagaceae	g__Leadbetterella	0.565217
OTU_90	2	3	435	0	2	11	14	183	0	106	1262	0	0	0	0	0	0	0	0	24	78	4	70	p__Proteobacteria	c__Gammaproteobacteria	o__Pseudomonadales	f__Pseudomonadaceae	g__Pseudomonas	0.565217
OTU_91	0	3	57	249	0	3	169	645	646	48	255	0	0	0	0	0	0	0	0	6	4	6	9	p__Proteobacteria	c__Gammaproteobacteria	o__Enterobacteriales	f__Enterobacteriaceae	g__	0.565217
OTU_92	0	1	23	1	2	11	4	7	0	4	562	0	0	1	2	0	0	31	0	218	362	99	431	p__Proteobacteria	c__Gammaproteobacteria	o__Enterobacteriales	f__Enterobacteriaceae	g__Erwinia	0.565217
OTU_93	3	1	1091	2	19	79	78	194	22	103	1	0	0	0	0	0	0	0	0	19	26	15	44	p__Proteobacteria	c__Gammaproteobacteria	o__Pseudomonadales	f__Moraxellaceae	g__Acinetobacter	0.565217
OTU_94	0	1178	11	0	4	1	0	14	1	0	0	5	12	62	97	6	9	1	8	4	0	0	2	p__Firmicutes	c__Bacilli	o__Bacillales	f__Staphylococcaceae	g__Staphylococcus	0.565217
OTU_95	2	2	1	0	0	8	0	0	0	22	11	0	1	3	662	261	414	3	1	5	5	0	2	p__Proteobacteria	c__Gammaproteobacteria	o__Pseudomonadales	f__Pseudomonadaceae	g__	0.565217
OTU_96	0	1	4	0	4	1072	0	2	1	105	1	0	1	20	6	27	2	0	0	8	7	131	10	p__Actinobacteria	c__Actinobacteria	o__Actinomycetales	f__Microbacteriaceae	g__Agromyces	0.565217
OTU_97	0	0	2	0	55	227	3	1	0	2	0	0	0	1	0	19	15	280	131	145	175	76	131	p__Actinobacteria	c__Actinobacteria	o__Actinomycetales	f__Nocardiaceae	g__Rhodococcus	0.565217
OTU_98	0	1	26	2	1	511	19	36	0	14	0	0	0	2	2	0	0	0	465	5	119	21	22	p__Bacteroidetes	c__Flavobacteriia	o__Flavobacteriales	f__[Weeksellaceae]	g__Chryseobacterium	0.565217
OTU_99	0	0	14	0	87	39	1	1	5	16	0	1	0	440	539	4	45	2	0	5	6	1	19	p__Cyanobacteria	c__Chloroplast	o__Streptophyta	f__	g__	0.565217
OTU_100	1	1	35	5	9	853	3	40	0	85	3	0	0	0	1	0	0	2	0	32	105	23	19	p__Proteobacteria	c__Alphaproteobacteria	o__Rhizobiales	f__Rhizobiaceae	g__Agrobacterium	0.565217
OTU_101	0	4	50	0	1	42	7	72	0	69	0	0	0	0	1	183	141	198	0	4	7	4	2	p__Proteobacteria	c__Gammaproteobacteria	o__Pseudomonadales	f__Pseudomonadaceae	g__Pseudomonas	0.565217
OTU_102	2	1	13	1	4	5	1	7	0	35	1	0	8	1	0	13	41	0	0	86	120	69	158	p__Proteobacteria	c__Alphaproteobacteria	o__Rhodobacterales	f__Rhodobacteraceae	g__Paracoccus	0.565217
OTU_103	12	6	6	27	0	13	0	0	0	16	1	1	1	0	6	97	150	0	0	60	86	12	45	p__Proteobacteria	c__Gammaproteobacteria	o__Pseudomonadales	f__Moraxellaceae	g__Acinetobacter	0.565217
OTU_104	0	3	11	3	0	23	92	285	10	44	1	0	0	0	0	0	0	2	0	2	7	3	6	p__Proteobacteria	c__Gammaproteobacteria	o__Enterobacteriales	f__Enterobacteriaceae	g__	0.565217
OTU_105	0	0	6	3	2	21	70	226	9	46	2	0	0	0	0	0	0	1	0	5	9	3	6	p__Proteobacteria	c__Gammaproteobacteria	o__Enterobacteriales	f__Enterobacteriaceae	g__	0.565217
OTU_106	3	0	5	0	2	66	3	8	47	6	3	0	0	0	0	0	0	0	0	10	18	36	103	p__Proteobacteria	c__Gammaproteobacteria	o__Pseudomonadales	f__Pseudomonadaceae	g__	0.565217
OTU_107	10	2	60	0	7	84	1	3	0	10	0	0	0	0	0	32	5	49	12	0	4	0	8	p__Proteobacteria	c__Betaproteobacteria	o__Burkholderiales	f__Comamonadaceae	g__	0.565217
OTU_108	3	1	19	4	2	166	0	1	0	11	0	0	0	11	0	6	5	25	4	2	3	0	0	p__Proteobacteria	c__Betaproteobacteria	o__Burkholderiales	f__Comamonadaceae		0.565217
OTU_109	2	1	7	6	2	7564	28	1	1	81	0	0	0	0	0	248	259	155	11	0	1	0	11	p__Proteobacteria	c__Betaproteobacteria	o__Burkholderiales	f__Comamonadaceae		0.521739
OTU_110	0	0	39	0	1	115	0	6	0	32	0	0	1	12	1	1	32	251	315	1524	3706	706	1065	p__Bacteroidetes	c__Flavobacteriia	o__Flavobacteriales	f__Flavobacteriaceae	g__Flavobacterium	0.521739
OTU_111	0	2	1	0	0	0	0	9	0	685	1	0	1	0	2	51	225	2539	437	1076	1547	252	463	p__Proteobacteria	c__Gammaproteobacteria	o__Alteromonadales	f__Alteromonadaceae	g__Cellvibrio	0.521739
OTU_112	1	1	0	0	1	240	1	7	0	770	0	0	1	1	2	200	110	599	591	968	849	290	512	p__Bacteroidetes	c__Flavobacteriia	o__Flavobacteriales	f__Flavobacteriaceae	g__	0.521739
OTU_113	0	0	261	5	0	213	321	1088	426	533	133	0	0	0	0	0	0	0	0	37	72	145	97	p__Proteobacteria	c__Gammaproteobacteria	o__Enterobacteriales	f__Enterobacteriaceae	g__	0.521739
OTU_114	14	1	2962	62	56	94	13	6	1	0	3	0	0	0	0	0	0	0	0	4	3	2	9	p__Proteobacteria	c__Gammaproteobacteria	o__Enterobacteriales	f__Enterobacteriaceae	g__	0.521739
OTU_115	0	0	18	1	22	1810	8	7	1	209	0	0	0	0	0	0	0	256	140	40	5	4	27	p__Bacteroidetes	c__Sphingobacteriia	o__Sphingobacteriales	f__Sphingobacteriaceae	g__Pedobacter	0.521739
OTU_116	1	1	57	0	2	15	25	185	278	180	1131	0	0	0	0	0	0	0	0	42	108	19	99	p__Proteobacteria	c__Gammaproteobacteria	o__Enterobacteriales	f__Enterobacteriaceae		0.521739
OTU_117	0	4	7	181	9	1723	1	7	7	52	11	0	0	1	1	0	0	0	9	0	3	4	1	p__Proteobacteria	c__Alphaproteobacteria	o__Rhizobiales	f__Rhizobiaceae	g__Agrobacterium	0.521739
OTU_118	82	26	40	21	29	33	20	953	22	32	63	0	0	0	0	0	0	4	0	0	0	1	0	p__Proteobacteria	c__Gammaproteobacteria	o__Xanthomonadales	f__Xanthomonadaceae	g__Stenotrophomonas	0.521739
OTU_119	0	1	50	2	14	193	0	4	12	804	3	0	0	0	0	0	0	1	0	30	64	29	11	p__Proteobacteria	c__Alphaproteobacteria	o__Rhizobiales	f__Brucellaceae		0.521739
OTU_120	0	0	176	25	3	64	169	547	10	160	17	0	0	0	0	0	0	0	0	1	10	3	13	p__Proteobacteria	c__Gammaproteobacteria	o__Enterobacteriales	f__Enterobacteriaceae	g__	0.521739
OTU_121	1	6	34	3	13	8	3	56	2	580	18	0	0	0	0	0	33	410	0	0	0	0	0	p__Proteobacteria	c__Gammaproteobacteria	o__Xanthomonadales	f__Xanthomonadaceae		0.521739
OTU_122	0	3	20	1	1	5	14	38	79	57	576	0	0	0	0	0	0	0	0	17	58	8	42	p__Proteobacteria	c__Gammaproteobacteria	o__Pseudomonadales	f__Pseudomonadaceae	g__Pseudomonas	0.521739
OTU_123	0	0	4	0	1	3	0	3	0	10	0	0	0	2	1	1	152	14	248	103	209	37	95	p__Bacteroidetes	c__Flavobacteriia	o__Flavobacteriales	f__Flavobacteriaceae	g__Flavobacterium	0.521739
OTU_124	0	2	0	0	1	7	1	3	2	204	1	0	1	1	0	0	77	197	120	87	8	11	31	p__Proteobacteria	c__Alphaproteobacteria	o__Caulobacterales	f__Caulobacteraceae	g__Mycoplana	0.521739
OTU_125	0	0	31	0	2	10	19	179	141	207	4	0	0	0	0	0	0	0	0	3	2	6	6	p__Proteobacteria	c__Gammaproteobacteria	o__Enterobacteriales	f__Enterobacteriaceae	g__Citrobacter	0.521739
OTU_126	6	1	13	0	0	16	1	2	53	4	400	0	0	0	0	0	0	2	1	5	14	6	15	p__Proteobacteria	c__Gammaproteobacteria	o__Pseudomonadales	f__Pseudomonadaceae	g__Pseudomonas	0.521739
OTU_127	0	1	1	0	4	166	1	4	0	5	0	0	2	1	1	28	2	195	3	1	19	5	4	p__Bacteroidetes	c__Cytophagia	o__Cytophagales	f__Cytophagaceae	g__Dyadobacter	0.521739
OTU_128	0	14	0	0	3	15	0	2	1	91	0	0	1	0	0	0	16	37	13	70	5	2	69	p__Proteobacteria	c__Alphaproteobacteria	o__Caulobacterales	f__Caulobacteraceae	g__Mycoplana	0.521739
OTU_129	0	0	16	1	54	103	1	10	0	25	0	1	0	1	0	12	21	4	0	19	29	2	14	p__Proteobacteria	c__Betaproteobacteria	o__Burkholderiales	f__Comamonadaceae	g__	0.521739
OTU_130	8	44	47	0	21	77	4	0	2	12	0	0	0	0	0	0	0	0	0	12	22	14	7	p__Proteobacteria	c__Betaproteobacteria	o__Burkholderiales	f__Oxalobacteraceae		0.521739
OTU_131	0	0	0	1	0	5	0	7	0	18	0	0	0	4	0	4	17	8	62	28	32	20	30	p__Proteobacteria	c__Betaproteobacteria	o__Burkholderiales	f__Comamonadaceae		0.521739
OTU_132	84	21	0	2	2	52	0	20	7	19	1	1	0	4	3	3	0	0	2	0	0	1	1	p__Firmicutes	c__Bacilli	o__Bacillales	f__Bacillaceae	g__	0.521739
OTU_133	0	1	10	0	2	19	2	0	0	39	0	0	0	0	3	32	40	0	1	35	14	11	12	p__Proteobacteria	c__Betaproteobacteria	o__Burkholderiales	f__Oxalobacteraceae	g__	0.521739
OTU_134	47	0	13	0	7	15	0	0	8	4	54	0	0	0	0	7	8	0	0	7	21	1	13	p__Proteobacteria	c__Gammaproteobacteria	o__Pseudomonadales	f__Pseudomonadaceae	g__Pseudomonas	0.521739
OTU_135	0	0	11	1	2	5	1	2	0	28	0	0	0	4	1	0	0	9	6	4	11	3	13	p__Proteobacteria	c__Betaproteobacteria	o__Burkholderiales	f__Comamonadaceae	g__Comamonas	0.521739
OTU_136	0	0	10	1	3	2	56	4	1	0	2	2	3	3	2	1	1	1	3	1	1	1	2	p__Proteobacteria	c__Alphaproteobacteria	o__Rhodospirillales	f__Acetobacteraceae	g__Gluconobacter	0.521739
OTU_137	0	0	0	2	0	0	0	2	0	9	0	0	0	4	0	3	5	5	16	7	13	9	4	p__Proteobacteria	c__Betaproteobacteria	o__Burkholderiales	f__Comamonadaceae		0.521739
OTU_138	0	0	49	0	9	58	1	65	0	11	0	0	1	3	0	9887	885	335	68	0	1	0	17	p__Bacteroidetes	c__Cytophagia	o__Cytophagales	f__Cytophagaceae	g__Dyadobacter	0.478261
OTU_139	2	1	5215	2	10	69	305	491	11	301	0	0	0	1	0	0	0	0	0	1	4	0	3	p__Proteobacteria	c__Gammaproteobacteria	o__Enterobacteriales	f__Enterobacteriaceae	g__	0.478261
OTU_140	840	347	700	1	290	1633	19	43	20	35	6	4	0	0	0	0	0	0	0	1	0	0	1	p__Proteobacteria	c__Betaproteobacteria	o__Burkholderiales	f__Oxalobacteraceae	g__	0.478261
OTU_141	0	0	67	0	0	1	1	7	1	96	0	0	0	0	0	605	626	266	23	7	23	25	10	p__Proteobacteria	c__Gammaproteobacteria	o__Pseudomonadales	f__Pseudomonadaceae	g__Pseudomonas	0.478261
OTU_142	201	179	243	7	85	965	5	25	8	11	4	0	0	0	0	0	0	0	0	0	0	0	0	p__Proteobacteria	c__Alphaproteobacteria	o__Rhizobiales	f__Phyllobacteriaceae	g__Phyllobacterium	0.478261
OTU_143	0	0	0	0	19	0	0	0	0	50	0	5	0	1	0	10	98	651	687	10	69	19	11	p__Bacteroidetes	c__Flavobacteriia	o__Flavobacteriales	f__[Weeksellaceae]	g__Chryseobacterium	0.478261
OTU_144	33	60	90	1237	0	2	3	7	40	2	1	0	0	5	2	0	0	0	0	1	1	0	0	p__Proteobacteria	c__Gammaproteobacteria	o__Xanthomonadales	f__Xanthomonadaceae	g__	0.478261
OTU_145	0	0	207	3	12	478	100	378	17	213	1	0	0	0	1	0	0	0	0	1	4	7	18	p__Proteobacteria	c__Gammaproteobacteria	o__Enterobacteriales	f__Enterobacteriaceae	g__	0.478261
OTU_146	200	109	168	3	41	532	4	13	4	10	3	0	0	0	1	0	0	0	0	0	0	0	0	p__Proteobacteria	c__Alphaproteobacteria	o__Rhizobiales	f__Phyllobacteriaceae	g__Phyllobacterium	0.478261
OTU_147	0	0	8	0	1	395	0	10	0	153	0	0	0	0	81	102	0	16	0	121	46	119	23	p__Actinobacteria	c__Actinobacteria	o__Actinomycetales	f__Microbacteriaceae	g__Cryocola	0.478261
OTU_148	1	0	19	0	2	128	4	16	1	374	1	0	0	6	0	0	0	0	0	173	159	22	96	p__Bacteroidetes	c__Sphingobacteriia	o__Sphingobacteriales	f__Sphingobacteriaceae	g__Pedobacter	0.478261
OTU_149	1	0	172	1	5	83	130	418	10	36	3	0	0	0	0	0	0	0	0	3	2	0	5	p__Proteobacteria	c__Gammaproteobacteria	o__Enterobacteriales	f__Enterobacteriaceae	g__	0.478261
OTU_150	0	0	2	0	0	8	3	37	3	8	537	0	0	0	0	0	0	0	0	22	40	15	98	p__Proteobacteria	c__Gammaproteobacteria	o__Pseudomonadales	f__Pseudomonadaceae	g__Pseudomonas	0.478261
OTU_151	44	1	21	0	19	143	0	2	0	12	0	0	5	0	482	2	0	0	1	0	0	12	9	p__Proteobacteria	c__Alphaproteobacteria	o__Sphingomonadales	f__Sphingomonadaceae	g__Sphingobium	0.478261
OTU_152	233	2	351	0	4	38	1	3	11	6	18	0	0	0	1	0	6	0	0	2	0	0	0	p__Proteobacteria	c__Gammaproteobacteria	o__Pseudomonadales	f__Moraxellaceae		0.478261
OTU_153	0	1	44	2	0	498	3	7	1	6	1	0	0	0	1	21	32	17	3	0	0	0	4	p__Proteobacteria	c__Betaproteobacteria	o__Burkholderiales	f__Comamonadaceae	g__	0.478261
OTU_154	0	0	9	0	0	3	3	33	194	174	74	0	0	0	0	0	0	0	0	25	52	14	41	p__Proteobacteria	c__Gammaproteobacteria	o__Pseudomonadales	f__Pseudomonadaceae	g__Pseudomonas	0.478261
OTU_155	0	0	2	1	1	129	1	1	0	64	2	0	0	0	1	164	24	0	47	82	7	26	12	p__Verrucomicrobia	c__Verrucomicrobiae	o__Verrucomicrobiales	f__Verrucomicrobiaceae	g__Luteolibacter	0.478261
OTU_156	4	0	242	2	0	10	44	130	2	45	2	0	0	0	0	0	0	0	0	1	6	0	10	p__Proteobacteria	c__Gammaproteobacteria	o__Pseudomonadales	f__Moraxellaceae	g__	0.478261
OTU_157	127	3	250	0	21	31	1	1	1	9	0	0	0	0	0	9	2	0	0	6	5	0	6	p__Proteobacteria	c__Gammaproteobacteria	o__Pseudomonadales	f__Pseudomonadaceae	g__	0.478261
OTU_158	0	0	27	0	2	1	46	51	4	63	3	0	0	0	0	0	0	0	0	37	89	16	82	p__Proteobacteria	c__Gammaproteobacteria	o__Pseudomonadales	f__Pseudomonadaceae	g__Pseudomonas	0.478261
OTU_159	0	1	6	0	1	12	0	1	0	115	31	0	0	62	8	1	15	31	0	37	27	1	14	p__Proteobacteria	c__Betaproteobacteria	o__Burkholderiales	f__Comamonadaceae	g__Comamonas	0.478261
OTU_160	4	0	5	0	19	48	2	0	6	1	0	9	0	13	239	1	0	0	0	8	0	0	7	p__Firmicutes	c__Bacilli	o__Lactobacillales	f__Streptococcaceae	g__Streptococcus	0.478261
OTU_161	0	0	2	0	2	124	1	11	0	90	1	0	0	0	0	6	1	0	3	12	10	46	7	p__Actinobacteria	c__Actinobacteria	o__Actinomycetales	f__Microbacteriaceae		0.478261
OTU_162	43	3	34	1	2	46	9	0	0	22	0	0	0	0	0	10	0	0	2	2	1	1	4	p__Proteobacteria	c__Betaproteobacteria	o__Burkholderiales	f__Oxalobacteraceae	g__	0.478261
OTU_163	13	4	4	2	5	1	0	77	4	12	3	0	0	0	0	0	0	12	17	0	0	0	0	p__Proteobacteria	c__Gammaproteobacteria	o__Xanthomonadales	f__Xanthomonadaceae		0.478261
OTU_164	0	1	6	17	0	13	8	21	0	7	5	0	0	0	0	0	0	0	0	11	16	7	27	p__Proteobacteria	c__Gammaproteobacteria	o__Enterobacteriales	f__Enterobacteriaceae	g__Erwinia	0.478261
OTU_165	2	0	3	0	2	6	2	0	0	1	0	1	27	1	54	7	0	0	23	0	0	2	6	p__Proteobacteria	c__Alphaproteobacteria	o__Sphingomonadales	f__Sphingomonadaceae	g__Sphingomonas	0.478261
OTU_166	0	1	0	5	0	4	0	0	0	11	1	2	0	23	0	1	5	26	9	7	4	5	0	p__Proteobacteria	c__Betaproteobacteria	o__Burkholderiales	f__Comamonadaceae	g__Delftia	0.478261
OTU_167	8	3	6	3	2	10	1	23	2	5	16	0	0	0	0	0	0	1	5	0	0	0	0	p__Proteobacteria	c__Gammaproteobacteria	o__Xanthomonadales	f__Xanthomonadaceae	g__Stenotrophomonas	0.478261
OTU_168	2	2	4	0	1	2	1	0	0	10	0	0	0	1	5	1	11	1	1	5	9	4	7	p__Proteobacteria	c__Gammaproteobacteria	o__Pseudomonadales	f__Moraxellaceae	g__Acinetobacter	0.478261
OTU_169	0	0	0	0	13	50	0	0	0	1	0	3063	0	3	3012	0	2	0	0	2524	1444	41714	1021	p__Proteobacteria	c__Gammaproteobacteria	o__Legionellales	f__Coxiellaceae	g__Rickettsiella	0.434783
OTU_170	0	1	206	1	7	1	5	12	0	1365	1	0	0	1	2	0	0	0	0	2449	1493	665	1127	p__Proteobacteria	c__Gammaproteobacteria	o__Enterobacteriales	f__Enterobacteriaceae	g__	0.434783
OTU_171	0	0	10	2	2	4842	2	1	2	70	0	0	0	0	0	0	17	0	0	5	0	0	2	p__Proteobacteria	c__Alphaproteobacteria	o__Rhizobiales	f__Rhizobiaceae	g__Agrobacterium	0.434783
OTU_172	0	0	0	0	0	0	0	0	0	0	0	3	5	1930	5	2	1	5	3	1	2	2	4	p__Proteobacteria	c__Epsilonproteobacteria	o__Campylobacterales	f__Helicobacteraceae	g__	0.434783
OTU_173	2	1	1745	8	40	43	6	9	0	1	4	0	0	0	0	0	0	0	0	3	0	0	2	p__Proteobacteria	c__Gammaproteobacteria	o__Pseudomonadales	f__Moraxellaceae	g__Acinetobacter	0.434783
OTU_174	0	1	0	1	3	64	1	0	0	69	0	0	0	0	0	113	879	170	0	115	93	18	37	p__Bacteroidetes	c__[Saprospirae]	o__[Saprospirales]	f__Chitinophagaceae	g__	0.434783
OTU_175	0	1	0	0	10	0	0	2	2	353	1	0	0	0	0	11	53	843	77	103	60	0	0	p__Proteobacteria	c__Alphaproteobacteria	o__Caulobacterales	f__Caulobacteraceae	g__Brevundimonas	0.434783
OTU_176	692	42	496	2	6	194	2	3	1	5	2	0	0	1	0	0	0	0	0	0	0	0	0	p__Proteobacteria	c__Gammaproteobacteria	o__Pseudomonadales	f__Moraxellaceae	g__Acinetobacter	0.434783
OTU_177	0	2	3	0	1	8	0	3	1	4	1032	0	0	0	0	0	0	0	0	35	91	11	84	p__Proteobacteria	c__Gammaproteobacteria	o__Enterobacteriales	f__Enterobacteriaceae	g__Erwinia	0.434783
OTU_178	0	0	2	1	0	237	0	1	0	109	0	1	0	0	0	266	40	382	96	4	24	0	34	p__Proteobacteria	c__Betaproteobacteria	o__Burkholderiales	f__Comamonadaceae	g__	0.434783
OTU_179	0	0	0	2	0	0	0	0	0	91	0	0	2	0	2	4	28	0	0	152	211	137	289	p__Proteobacteria					0.434783
OTU_180	392	17	339	6	5	86	1	1	0	1	3	0	0	0	0	0	2	0	0	1	6	0	2	p__Proteobacteria	c__Gammaproteobacteria	o__Pseudomonadales	f__Moraxellaceae	g__Acinetobacter	0.434783
OTU_181	0	0	0	0	1	149	1	1	0	46	3	0	0	0	0	43	21	159	1	94	134	35	53	p__Proteobacteria	c__Gammaproteobacteria	o__Xanthomonadales	f__Xanthomonadaceae	g__Luteimonas	0.434783
OTU_182	0	0	20	0	0	117	0	1	0	163	0	0	0	1	0	207	74	0	27	45	25	27	29	p__Proteobacteria	c__Betaproteobacteria	o__Burkholderiales	f__Oxalobacteraceae	g__	0.434783
OTU_183	0	0	0	0	1	2	0	2	0	2	0	0	0	1	0	40	1	36	2	179	319	55	83	p__Bacteroidetes	c__Flavobacteriia	o__Flavobacteriales	f__Flavobacteriaceae	g__Flavobacterium	0.434783
OTU_184	5	0	625	14	6	13	2	5	0	0	0	0	0	0	0	0	0	0	0	9	9	0	4	p__Proteobacteria					0.434783
OTU_185	149	69	155	1	65	172	9	12	3	9	5	0	0	0	0	0	0	0	0	0	0	0	0	p__Proteobacteria	c__Betaproteobacteria	o__Burkholderiales	f__Comamonadaceae		0.434783
OTU_186	0	2	2	0	3	3	2	1	5	6	2	0	0	0	0	375	221	0	0	0	0	0	0	p__Proteobacteria	c__Gammaproteobacteria	o__Oceanospirillales	f__Halomonadaceae	g__Candidatus Portiera	0.434783
OTU_187	31	394	68	6	0	4	2	3	71	2	38	0	0	0	0	0	0	0	0	0	0	0	0	p__Proteobacteria					0.434783
OTU_188	1	0	10	0	47	3	0	1	5	4	445	0	1	0	0	2	0	0	0	8	25	0	4	p__Proteobacteria	c__Gammaproteobacteria	o__Pseudomonadales	f__Pseudomonadaceae	g__Pseudomonas	0.434783
OTU_189	3	1	1	0	188	217	26	12	0	2	4	0	1	3	1	4	0	0	0	0	0	2	1	p__Proteobacteria	c__Alphaproteobacteria	o__Rhodospirillales	f__Acetobacteraceae	g__	0.434783
OTU_190	100	37	102	1	38	163	3	2	4	7	2	0	0	0	0	0	0	0	0	0	0	0	0	p__Proteobacteria	c__Betaproteobacteria	o__Burkholderiales	f__Comamonadaceae		0.434783
OTU_191	0	24	3	0	0	0	0	0	0	0	0	18	18	1	195	0	0	48	2	5	26	1	93	p__Proteobacteria	c__Betaproteobacteria	o__Burkholderiales	f__Comamonadaceae	g__Tepidimonas	0.434783
OTU_192	0	0	0	0	11	12	0	0	0	0	0	0	0	7	1	2	0	2	10	72	24	233	3	p__Actinobacteria	c__Actinobacteria	o__Actinomycetales	f__Microbacteriaceae	g__Microbacterium	0.434783
OTU_193	0	0	0	0	4	94	0	2	0	45	0	0	0	3	0	7	1	0	0	9	86	101	14	p__Actinobacteria	c__Actinobacteria	o__Actinomycetales	f__Microbacteriaceae		0.434783
OTU_194	0	7	10	0	0	15	0	0	0	3	0	1	1	194	9	0	0	83	24	0	2	11	0	p__Proteobacteria	c__Betaproteobacteria	o__Burkholderiales	f__Comamonadaceae	g__Comamonas	0.434783
OTU_195	0	0	2	23	0	0	2	7	0	51	62	0	0	0	0	0	0	0	0	55	68	16	74	p__Proteobacteria					0.434783
OTU_196	0	0	14	2	0	174	1	8	0	51	1	0	0	0	0	0	24	0	34	36	7	0	2	p__Proteobacteria	c__Alphaproteobacteria	o__Rhizobiales	f__Hyphomicrobiaceae	g__Devosia	0.434783
OTU_197	1	0	174	0	0	3	6	60	2	48	3	0	0	0	0	0	0	0	0	4	16	0	14	p__Proteobacteria	c__Gammaproteobacteria	o__Pseudomonadales	f__Pseudomonadaceae	g__Pseudomonas	0.434783
OTU_198	78	28	53	0	21	114	0	5	3	3	0	0	0	0	0	0	0	0	3	1	1	2	1	p__Proteobacteria	c__Betaproteobacteria	o__Burkholderiales	f__Comamonadaceae		0.434783
OTU_199	0	0	22	2	0	4	29	73	1	98	4	0	0	0	0	0	0	0	0	3	7	0	11	p__Proteobacteria	c__Betaproteobacteria	o__Burkholderiales	f__Comamonadaceae	g__Comamonas	0.434783
OTU_200	0	2	14	1	0	14	0	0	1	69	0	0	0	0	0	0	2	106	28	2	7	5	0	p__Proteobacteria	c__Betaproteobacteria	o__Burkholderiales	f__Comamonadaceae	g__Comamonas	0.434783
OTU_201	41	2	10	0	0	12	1	0	19	10	129	0	0	0	0	0	0	0	0	4	3	0	6	p__Proteobacteria	c__Gammaproteobacteria	o__Pseudomonadales	f__Pseudomonadaceae	g__Pseudomonas	0.434783
OTU_202	87	0	100	0	5	9	0	3	7	9	9	0	0	0	0	0	3	0	0	0	0	1	2	p__Proteobacteria	c__Betaproteobacteria	o__Burkholderiales	f__Comamonadaceae		0.434783
OTU_203	24	20	27	0	2	80	0	1	1	0	0	0	29	2	0	0	0	0	0	2	1	2	29	p__Actinobacteria	c__Actinobacteria	o__Actinomycetales	f__Micrococcaceae	g__Renibacterium	0.434783
OTU_204	1	3	0	0	0	4	0	0	0	1	0	0	0	28	2	3	0	2	1	28	5	132	2	p__Actinobacteria	c__Actinobacteria	o__Actinomycetales	f__Microbacteriaceae	g__Microbacterium	0.434783
OTU_205	0	0	5	2	0	0	5	12	0	69	16	0	0	0	0	0	0	0	0	12	38	4	20	p__Proteobacteria					0.434783
OTU_206	40	2	50	0	0	3	1	0	1	3	1	0	0	0	0	0	3	0	0	7	22	2	17	p__Proteobacteria	c__Gammaproteobacteria	o__Pseudomonadales	f__Moraxellaceae	g__Acinetobacter	0.434783
OTU_207	0	0	2	1	4	8	40	56	4	18	2	0	0	0	0	0	0	0	0	0	6	2	1	p__Proteobacteria	c__Gammaproteobacteria	o__Enterobacteriales	f__Enterobacteriaceae	g__	0.434783
OTU_208	0	0	1	0	0	0	0	2	1	18	0	4	8	0	22	0	2	46	3	16	0	1	4	p__Proteobacteria	c__Gammaproteobacteria	o__Pseudomonadales	f__Moraxellaceae	g__Enhydrobacter	0.434783
OTU_209	0	0	2	2	0	1	18	61	0	6	0	1	0	2	0	0	0	1	0	2	5	5	3	p__Proteobacteria	c__Gammaproteobacteria	o__Enterobacteriales	f__Enterobacteriaceae	g__	0.434783
OTU_210	31	0	14	0	1	1	0	1	13	4	9	0	0	0	0	0	2	1	1	3	12	3	12	p__Proteobacteria	c__Betaproteobacteria	o__Burkholderiales	f__Comamonadaceae	g__	0.434783
OTU_211	0	0	0	0	24	0	0	0	0	0	0	1	5	11	7	5	2	6	4	1	3	0	3	p__Proteobacteria	c__Alphaproteobacteria	o__Rhodospirillales	f__Acetobacteraceae		0.434783
OTU_212	1	1	4	1	27213	34	1	3	1	83	3	0	0	0	0	0	0	0	0	17	0	43	4	p__Actinobacteria	c__Actinobacteria	o__Actinomycetales	f__Nocardiaceae	g__Rhodococcus	0.391304
OTU_213	0	1	3	0	28	10253	2	29	1	71	2	0	0	0	0	0	0	0	0	3	0	26	0	p__Firmicutes	c__Bacilli	o__Bacillales	f__Paenibacillaceae	g__Paenibacillus	0.391304
OTU_214	0	0	0	0	0	0	0	0	0	2	0	0	0	0	0	1135	1316	2	52	204	213	66	105	p__Proteobacteria					0.391304
OTU_215	0	1	46	93	0	6	315	1043	867	77	49	0	0	0	0	0	0	0	0	1	1	1	2	p__Proteobacteria	c__Gammaproteobacteria	o__Enterobacteriales	f__Enterobacteriaceae		0.391304
OTU_216	0	1	0	0	6	39	0	0	0	63	1	1040	0	3	730	1	0	0	1	44	2	155	0	p__Proteobacteria	c__Gammaproteobacteria	o__Legionellales	f__Coxiellaceae	g__Rickettsiella	0.391304
OTU_217	0	0	9	0	2	89	0	2	0	0	12	0	0	0	0	0	0	0	0	445	758	127	549	p__Proteobacteria					0.391304
OTU_218	767	22	623	5	17	135	0	4	0	4	2	1	0	1	0	1	0	0	0	0	0	0	0	p__Proteobacteria	c__Gammaproteobacteria	o__Pseudomonadales	f__Moraxellaceae	g__Acinetobacter	0.391304
OTU_219	0	0	115	322	1	0	142	427	406	17	6	0	0	0	0	0	0	0	0	0	3	1	4	p__Proteobacteria	c__Gammaproteobacteria	o__Xanthomonadales	f__Xanthomonadaceae	g__Stenotrophomonas	0.391304
OTU_220	0	0	3	0	2	1	0	3	3	13	1	0	0	0	0	0	0	0	0	230	428	190	521	p__Proteobacteria	c__Gammaproteobacteria	o__Pseudomonadales	f__Moraxellaceae	g__Acinetobacter	0.391304
OTU_221	0	950	0	3	0	3	0	1	2	0	74	0	1	0	294	0	0	2	1	7	2	1	0	p__Proteobacteria	c__Gammaproteobacteria	o__Xanthomonadales	f__Xanthomonadaceae	g__Stenotrophomonas	0.391304
OTU_222	0	0	0	0	0	0	0	0	0	53	0	0	0	0	0	58	205	197	643	90	68	2	25	p__Bacteroidetes					0.391304
OTU_223	3	0	0	0	0	6	0	0	0	75	0	0	0	0	1	172	940	0	0	47	37	2	16	p__Proteobacteria					0.391304
OTU_224	10	1	9	0	0	4	0	0	12	23	1151	5	0	0	0	0	0	0	0	1	6	0	6	p__Proteobacteria	c__Gammaproteobacteria	o__Pseudomonadales	f__Pseudomonadaceae	g__Pseudomonas	0.391304
OTU_225	0	0	26	2	3	47	225	654	28	158	3	0	0	0	0	0	0	0	0	0	0	0	0	p__Proteobacteria					0.391304
OTU_226	1	0	2	0	1	461	0	1	0	54	0	0	0	0	0	183	65	35	51	4	4	0	0	p__Bacteroidetes	c__Cytophagia	o__Cytophagales	f__Cytophagaceae	g__Dyadobacter	0.391304
OTU_227	10	2	695	0	28	38	14	46	0	13	4	0	0	0	0	0	0	0	0	0	0	0	0	p__Proteobacteria					0.391304
OTU_228	0	2	29	67	0	1	117	341	254	22	2	0	0	0	0	0	0	0	0	0	2	0	0	p__Proteobacteria					0.391304
OTU_229	0	0	567	4	51	43	52	9	0	3	2	0	0	0	0	0	0	0	0	1	3	1	1	p__Proteobacteria	c__Gammaproteobacteria	o__Enterobacteriales	f__Enterobacteriaceae	g__	0.391304
OTU_230	3	1	306	0	3	18	91	190	2	26	0	0	0	0	0	0	0	0	0	0	4	0	1	p__Proteobacteria	c__Betaproteobacteria	o__Burkholderiales	f__Comamonadaceae		0.391304
OTU_231	0	1	3	0	4	94	0	1	2	3	1	0	0	5	3	5	474	0	1	0	1	1	0	p__Cyanobacteria	c__Chloroplast	o__Streptophyta	f__	g__	0.391304
OTU_232	0	0	0	0	0	5	0	0	0	50	0	0	1	1	3	5	6	0	0	119	226	24	147	p__Proteobacteria	c__Gammaproteobacteria	o__Pseudomonadales	f__Moraxellaceae	g__Acinetobacter	0.391304
OTU_233	2	1	68	14	1	20	61	227	5	149	0	0	0	0	0	0	0	0	0	1	1	4	1	p__Proteobacteria	c__Gammaproteobacteria	o__Enterobacteriales	f__Enterobacteriaceae		0.391304
OTU_234	0	0	119	1	0	1	5	69	0	26	204	0	0	0	0	0	0	0	0	8	17	5	41	p__Proteobacteria	c__Gammaproteobacteria	o__Pseudomonadales	f__Pseudomonadaceae	g__Pseudomonas	0.391304
OTU_235	270	17	114	0	6	73	2	5	1	3	1	0	0	0	0	0	0	0	0	2	0	0	0	p__Proteobacteria	c__Betaproteobacteria	o__Burkholderiales	f__Comamonadaceae		0.391304
OTU_236	0	0	0	1	0	133	0	2	0	3	0	0	0	0	0	0	0	227	41	14	39	6	14	p__Actinobacteria					0.391304
OTU_237	0	0	0	0	0	0	2	0	0	8	0	0	0	1	0	0	2	185	165	4	42	9	7	p__Bacteroidetes					0.391304
OTU_238	2	1	25	349	2	15	6	4	1	14	0	0	0	1	0	0	0	0	0	2	0	0	0	p__Proteobacteria	c__Betaproteobacteria	o__Burkholderiales	f__Comamonadaceae		0.391304
OTU_239	0	0	0	1	1	226	0	2	1	130	0	0	0	0	0	7	12	0	0	10	16	2	2	p__Proteobacteria	c__Alphaproteobacteria	o__Rhizobiales	f__Hyphomicrobiaceae	g__Devosia	0.391304
OTU_240	0	0	0	0	1	20	0	0	0	53	0	0	0	1	0	98	95	69	32	0	18	2	5	p__Bacteroidetes	c__Flavobacteriia	o__Flavobacteriales	f__Cryomorphaceae	g__Fluviicola	0.391304
OTU_241	0	0	0	0	0	17	0	0	0	0	0	0	0	30	123	132	3	63	4	4	0	0	10	p__Actinobacteria					0.391304
OTU_242	91	14	140	1	7	76	7	19	6	12	1	0	0	0	0	0	0	0	1	0	0	0	0	p__Proteobacteria	c__Betaproteobacteria	o__Burkholderiales	f__Comamonadaceae	g__Curvibacter	0.391304
OTU_243	79	22	85	0	22	108	2	4	3	2	0	0	0	0	0	0	0	0	0	0	0	0	0	p__Proteobacteria					0.391304
OTU_244	4	0	2	0	12	31	0	0	6	1	0	8	0	0	237	0	0	0	0	7	0	0	2	p__Firmicutes					0.391304
OTU_245	79	2	178	0	0	11	0	4	0	1	1	0	0	0	0	0	4	0	0	6	5	1	9	p__Proteobacteria	c__Gammaproteobacteria	o__Pseudomonadales	f__Moraxellaceae	g__Acinetobacter	0.391304
OTU_246	0	0	18	0	0	9	54	77	1	63	1	0	0	0	0	0	0	0	0	7	26	3	30	p__Proteobacteria	c__Gammaproteobacteria	o__Enterobacteriales	f__Enterobacteriaceae	g__	0.391304
OTU_247	0	1	1	0	0	5	1	6	34	41	150	0	0	0	0	0	0	0	0	5	24	4	9	p__Proteobacteria	c__Gammaproteobacteria	o__Pseudomonadales	f__Pseudomonadaceae	g__	0.391304
OTU_248	0	0	107	5	1	7	8	131	0	2	0	0	0	1	1	0	0	3	0	0	4	0	7	p__Proteobacteria	c__Gammaproteobacteria	o__Enterobacteriales	f__Enterobacteriaceae	g__	0.391304
OTU_249	15	166	20	1	0	5	3	2	23	2	3	0	0	0	0	0	0	0	0	0	0	0	0	p__Proteobacteria					0.391304
OTU_250	10	166	23	1	0	0	0	3	16	0	3	0	1	0	0	0	0	0	0	5	4	2	0	p__Proteobacteria	c__Gammaproteobacteria	o__Xanthomonadales	f__Xanthomonadaceae	g__Stenotrophomonas	0.391304
OTU_251	0	0	36	0	0	76	5	16	0	43	0	0	0	0	0	0	0	0	0	4	4	10	24	p__Proteobacteria					0.391304
OTU_252	0	0	24	129	2	0	1	0	0	2	10	0	0	0	0	0	0	0	0	15	21	2	6	p__Proteobacteria					0.391304
OTU_253	0	0	1	0	1	18	1	4	0	27	1	0	0	0	2	79	34	0	0	1	32	2	8	p__Bacteroidetes	c__Flavobacteriia	o__Flavobacteriales	f__Flavobacteriaceae	g__Flavobacterium	0.391304
OTU_254	0	0	0	0	0	30	0	0	0	23	1	0	0	1	0	11	20	36	0	17	50	11	10	p__Proteobacteria	c__Gammaproteobacteria	o__Xanthomonadales	f__Xanthomonadaceae		0.391304
OTU_255	0	1	0	0	1	50	1	0	0	25	0	0	0	0	0	16	3	29	0	21	34	4	20	p__Proteobacteria	c__Gammaproteobacteria	o__Xanthomonadales	f__Xanthomonadaceae	g__Luteimonas	0.391304
OTU_256	2	5	4	1	3	48	3	8	1	119	7	0	0	0	0	0	0	0	0	0	0	0	0	p__Proteobacteria	c__Gammaproteobacteria	o__Enterobacteriales	f__Enterobacteriaceae		0.391304
OTU_257	0	0	143	2	6	6	10	9	1	1	2	0	0	1	1	0	0	0	0	1	2	1	6	p__Proteobacteria	c__Gammaproteobacteria	o__Enterobacteriales	f__Enterobacteriaceae	g__	0.391304
OTU_258	4	0	12	0	1	19	0	2	0	1	0	0	0	18	115	2	1	9	1	0	0	1	2	p__Proteobacteria	c__Betaproteobacteria	o__Burkholderiales	f__Comamonadaceae	g__	0.391304
OTU_259	30	8	34	1	12	65	1	3	2	2	9	0	1	0	0	1	0	1	0	0	1	1	0	p__Proteobacteria	c__Gammaproteobacteria	o__Pseudomonadales	f__Moraxellaceae	g__Acinetobacter	0.391304
OTU_260	2	0	101	0	1	5	11	24	0	3	1	0	0	0	0	0	0	0	0	1	3	2	15	p__Proteobacteria	c__Gammaproteobacteria	o__Enterobacteriales	f__Enterobacteriaceae	g__	0.391304
OTU_261	0	0	2	0	0	3	12	23	0	79	0	0	0	0	0	0	0	0	0	4	9	3	28	p__Proteobacteria					0.391304
OTU_262	0	0	21	0	0	26	3	15	0	12	0	0	0	0	0	0	0	0	0	10	24	3	27	p__Proteobacteria					0.391304
OTU_263	0	0	54	4	19	2	5	0	0	14	0	0	1	1	1	0	0	0	18	7	0	0	9	p__Proteobacteria	c__Alphaproteobacteria	o__Sphingomonadales	f__Sphingomonadaceae	g__Sphingomonas	0.391304
OTU_264	10	0	5	0	0	2	0	0	2	0	0	0	0	0	0	0	2	0	0	20	45	4	17	p__Proteobacteria					0.391304
OTU_265	0	0	8	0	0	2	4	17	0	2	0	0	0	0	0	0	0	0	0	9	18	8	22	p__Proteobacteria					0.391304
OTU_266	8	0	1	0	0	4	0	0	1	5	16	0	0	0	0	2	0	0	0	8	12	9	21	p__Proteobacteria	c__Gammaproteobacteria	o__Pseudomonadales	f__Pseudomonadaceae	g__Pseudomonas	0.391304
OTU_267	14	8	20	0	5	23	0	0	1	1	0	0	0	0	0	0	0	0	2	3	4	1	3	p__Proteobacteria	c__Betaproteobacteria	o__Burkholderiales	f__Comamonadaceae	g__Curvibacter	0.391304
OTU_268	9	0	8	0	0	7	0	0	0	1	0	0	0	0	0	8	13	0	0	4	3	2	10	p__Proteobacteria					0.391304
OTU_269	4	7	5	0	2	6	0	0	0	0	0	0	22	0	2	0	0	0	13	0	0	0	3	p__Proteobacteria					0.391304
OTU_270	0	10	18	0	3	2	1	0	0	2	1	11	4	0	1	0	0	0	0	0	3	6	0	p__Actinobacteria	c__Actinobacteria	o__Actinomycetales	f__Corynebacteriaceae	g__Corynebacterium	0.391304
OTU_271	7	1	14	0	0	3	1	8	0	4	8	0	0	0	0	0	0	0	0	1	2	2	2	p__Proteobacteria	c__Gammaproteobacteria	o__Xanthomonadales	f__Xanthomonadaceae	g__Stenotrophomonas	0.391304
OTU_272	0	0	2	0	2	2772	0	2	2	352	1	0	0	0	0	0	0	1	0	220	0	0	61	p__Bacteroidetes	c__Sphingobacteriia	o__Sphingobacteriales	f__Sphingobacteriaceae	g__Sphingobacterium	0.347826
OTU_273	88	4	3	2	1	1	1	2	459	2	2362	0	0	0	0	0	0	0	0	1	0	0	0	p__Proteobacteria	c__Gammaproteobacteria	o__Pseudomonadales	f__Pseudomonadaceae	g__Pseudomonas	0.347826
OTU_274	27	35	13	1453	0	207	0	1	1	3	1	0	0	0	0	4	3	0	0	0	0	0	0	p__Proteobacteria	c__Gammaproteobacteria	o__Pseudomonadales	f__Moraxellaceae	g__Acinetobacter	0.347826
OTU_275	811	30	636	0	8	239	0	4	1	3	1	0	0	0	0	0	0	0	0	0	3	1	0	p__Proteobacteria	c__Betaproteobacteria	o__Burkholderiales	f__Comamonadaceae		0.347826
OTU_276	0	0	0	0	1	315	1	2	1	86	1	0	0	0	0	159	100	695	0	183	58	0	0	p__Bacteroidetes	c__Cytophagia	o__Cytophagales	f__Cytophagaceae	g__Dyadobacter	0.347826
OTU_277	0	0	0	0	0	635	0	53	0	210	0	0	0	0	0	2	0	0	0	41	62	488	39	p__Actinobacteria					0.347826
OTU_278	2	79	25	916	0	0	1	2	12	4	38	0	0	1	0	0	0	0	0	1	0	0	1	p__Proteobacteria	c__Betaproteobacteria	o__Burkholderiales	f__Comamonadaceae	g__	0.347826
OTU_279	1	0	1	1	1	96	0	0	0	16	0	0	0	0	1	0	0	634	240	28	8	2	40	p__Proteobacteria	c__Alphaproteobacteria	o__Caulobacterales	f__Caulobacteraceae	g__	0.347826
OTU_280	49	7	79	0	0	0	0	1	671	2	222	0	0	0	0	1	0	0	0	0	2	0	2	p__Proteobacteria					0.347826
OTU_281	3	0	396	4	2	115	109	282	1	94	0	0	0	0	0	0	0	0	0	1	0	0	0	p__Proteobacteria					0.347826
OTU_282	0	0	82	0	1	384	1	3	1	169	0	0	0	0	0	0	0	0	0	32	114	22	51	p__Actinobacteria	c__Actinobacteria	o__Actinomycetales	f__Cellulomonadaceae		0.347826
OTU_283	0	0	22	0	43	577	0	27	4	1	2	0	0	0	2	0	0	0	35	0	0	0	0	p__Proteobacteria					0.347826
OTU_284	0	0	0	0	0	0	0	0	0	36	0	0	0	0	1	113	50	203	0	13	139	65	46	p__Bacteroidetes					0.347826
OTU_285	0	0	0	0	0	0	0	1	0	278	1	0	0	0	1	6	132	0	129	22	52	10	22	p__Bacteroidetes	c__Flavobacteriia	o__Flavobacteriales	f__Flavobacteriaceae	g__	0.347826
OTU_286	332	15	193	1	6	43	0	0	0	3	1	0	0	0	0	0	0	0	0	1	4	1	5	p__Proteobacteria	c__Betaproteobacteria	o__Burkholderiales	f__Comamonadaceae		0.347826
OTU_287	0	1	22	11	0	0	0	36	0	28	486	0	0	0	0	0	0	0	0	2	4	1	4	p__Proteobacteria					0.347826
OTU_288	0	0	0	2	0	2	0	0	0	1	167	0	0	0	0	0	0	15	0	92	161	50	94	p__Proteobacteria					0.347826
OTU_289	0	0	0	0	0	0	0	0	0	0	0	18	19	0	192	7	0	100	0	0	77	2	154	p__Firmicutes					0.347826
OTU_290	0	32	4	3	11	1	0	438	1	0	0	19	0	2	0	0	0	1	0	0	0	0	9	p__Firmicutes	c__Bacilli	o__Bacillales			0.347826
OTU_291	0	0	1	0	0	0	0	0	0	2	0	0	0	0	0	17	239	1	12	61	91	28	22	p__Proteobacteria					0.347826
OTU_292	0	1	0	0	1	257	1	2	0	49	1	0	0	0	0	0	0	46	0	22	40	5	21	p__Actinobacteria	c__Actinobacteria	o__Actinomycetales	f__Beutenbergiaceae	g__Salana	0.347826
OTU_293	0	0	11	46	1	1	28	98	199	18	2	0	0	1	0	0	0	0	1	0	1	2	1	p__Proteobacteria	c__Gammaproteobacteria	o__Enterobacteriales	f__Enterobacteriaceae	g__Citrobacter	0.347826
OTU_294	2	5	2	255	0	7	0	0	0	0	0	0	0	0	1	9	79	0	7	0	0	0	1	p__Proteobacteria					0.347826
OTU_295	0	0	0	0	0	25	0	0	0	37	0	0	0	0	0	21	140	0	102	17	8	1	4	p__Proteobacteria					0.347826
OTU_296	0	0	17	0	0	52	47	160	3	71	0	0	0	0	0	0	0	0	0	2	0	0	3	p__Proteobacteria					0.347826
OTU_297	151	6	131	0	4	42	0	1	2	2	1	0	0	0	0	1	2	1	0	0	0	0	0	p__Proteobacteria	c__Gammaproteobacteria	o__Pseudomonadales	f__Moraxellaceae	g__Acinetobacter	0.347826
OTU_298	0	0	0	0	0	2	0	0	0	6	0	0	0	0	0	3	12	0	1	50	127	25	118	p__Proteobacteria					0.347826
OTU_299	0	0	2	3	0	0	1	8	4	1	303	0	0	0	0	0	0	0	0	5	6	0	3	p__Proteobacteria					0.347826
OTU_300	0	1	172	0	2	45	50	28	3	21	1	0	0	0	0	0	0	1	0	0	0	0	3	p__Firmicutes	c__Bacilli	o__Lactobacillales	f__Enterococcaceae		0.347826
OTU_301	0	0	1	0	0	1	2	9	0	9	188	0	0	0	0	0	0	0	0	18	61	12	19	p__Proteobacteria					0.347826
OTU_302	0	0	0	0	3	173	0	0	1	6	0	0	0	0	0	50	1	0	0	43	14	7	16	p__Proteobacteria					0.347826
OTU_303	0	0	0	0	0	0	0	0	0	0	0	0	0	0	1	3	43	141	2	26	57	15	24	p__Bacteroidetes					0.347826
OTU_304	3	0	173	0	1	89	4	9	1	5	0	0	0	0	0	4	0	0	0	3	0	0	0	p__Proteobacteria					0.347826
OTU_305	0	4	25	0	15	73	1	3	2	1	0	0	1	0	135	1	0	0	0	0	0	1	11	p__Actinobacteria	c__Actinobacteria	o__Actinomycetales	f__Micrococcaceae	g__Micrococcus	0.347826
OTU_306	3	0	120	49	1	7	2	1	0	1	61	0	0	0	0	0	0	0	0	0	1	2	3	p__Proteobacteria	c__Gammaproteobacteria	o__Enterobacteriales	f__Enterobacteriaceae	g__Erwinia	0.347826
OTU_307	1	8	11	0	15	58	0	0	0	2	0	0	0	0	121	2	0	0	0	0	0	0	2	p__Proteobacteria					0.347826
OTU_308	3	0	141	1	0	29	3	4	1	32	2	0	0	0	0	0	0	0	0	2	0	0	0	p__Proteobacteria					0.347826
OTU_309	0	0	0	0	0	0	0	0	0	10	0	0	0	0	0	86	67	0	2	22	18	5	8	p__Proteobacteria					0.347826
OTU_310	0	0	0	0	0	0	0	2	0	2	0	0	0	0	0	0	0	33	47	24	65	11	31	p__Bacteroidetes					0.347826
OTU_311	46	30	53	1	18	51	1	2	1	5	3	0	0	0	0	0	0	0	0	0	0	0	0	p__Proteobacteria	c__Betaproteobacteria	o__Burkholderiales	f__Comamonadaceae		0.347826
OTU_312	0	0	0	0	0	0	0	0	0	37	0	0	0	0	0	89	19	5	43	0	5	2	8	p__Proteobacteria					0.347826
OTU_313	1	0	0	0	1	0	0	0	0	9	0	0	0	0	0	3	3	0	2	51	96	14	24	p__Proteobacteria					0.347826
OTU_314	21	0	107	0	1	0	0	0	0	2	3	0	0	0	0	0	0	0	0	18	20	6	26	p__Proteobacteria					0.347826
OTU_315	50	15	43	0	22	64	0	3	0	2	2	0	0	0	0	0	0	0	0	0	0	0	0	p__Proteobacteria					0.347826
OTU_316	1	1	2	1	1	1	2	0	2	27	1	0	0	0	0	51	89	13	0	0	4	1	0	p__Proteobacteria	c__Gammaproteobacteria	o__Alteromonadales	f__[Chromatiaceae]	g__Rheinheimera	0.347826
OTU_317	0	0	0	0	0	4	0	0	3	4	16	0	1	1	0	53	90	1	0	5	3	1	0	p__Proteobacteria	c__Gammaproteobacteria	o__Pseudomonadales	f__Pseudomonadaceae	g__	0.347826
OTU_318	39	16	33	0	6	55	1	6	1	2	3	0	0	0	0	0	0	0	0	0	0	0	0	p__Proteobacteria					0.347826
OTU_319	0	0	69	0	1	15	8	20	1	34	0	0	0	0	0	0	0	0	0	6	3	3	1	p__Proteobacteria	c__Betaproteobacteria	o__Burkholderiales	f__Oxalobacteraceae	g__	0.347826
OTU_320	47	17	40	1	10	38	2	0	2	2	1	0	0	0	0	0	0	0	0	0	0	0	0	p__Proteobacteria					0.347826
OTU_321	1	12	54	2	1	16	40	13	6	6	0	1	0	0	0	0	0	0	0	0	0	0	0	p__Proteobacteria	c__Betaproteobacteria	o__Burkholderiales	f__Oxalobacteraceae	g__Janthinobacterium	0.347826
OTU_322	0	0	1	0	0	3	0	0	1	4	0	0	0	0	0	0	0	14	4	57	9	12	45	p__Proteobacteria					0.347826
OTU_323	0	0	117	0	0	1	0	1	5	6	2	0	0	0	0	0	0	0	0	5	4	4	5	p__Proteobacteria					0.347826
OTU_324	0	0	83	0	0	1	2	2	0	38	3	0	0	0	0	0	0	0	0	3	6	0	9	p__Proteobacteria					0.347826
OTU_325	17	17	51	0	3	32	4	12	0	7	1	0	0	0	0	0	0	0	0	0	0	0	0	p__Proteobacteria					0.347826
OTU_326	13	2	43	47	0	0	2	3	22	0	0	0	0	1	0	0	1	0	0	3	1	0	0	p__Proteobacteria	c__Gammaproteobacteria	o__Xanthomonadales	f__Xanthomonadaceae	g__Stenotrophomonas	0.347826
OTU_327	30	8	21	0	10	46	1	1	3	2	3	0	0	0	0	0	0	0	0	0	0	0	0	p__Proteobacteria					0.347826
OTU_328	19	16	36	0	8	33	2	8	0	0	2	0	0	0	0	0	0	0	0	0	0	0	0	p__Proteobacteria					0.347826
OTU_329	0	0	8	0	0	0	9	80	2	9	9	0	0	0	0	0	0	0	0	2	2	0	0	p__Proteobacteria					0.347826
OTU_330	11	6	29	0	4	22	0	1	0	14	1	0	0	0	0	0	0	0	0	26	0	0	4	p__Proteobacteria					0.347826
OTU_331	1	0	4	0	0	2	0	3	15	8	70	0	0	0	0	0	0	0	0	1	8	1	3	p__Proteobacteria	c__Gammaproteobacteria	o__Pseudomonadales	f__Pseudomonadaceae	g__Pseudomonas	0.347826
OTU_332	29	10	19	0	6	44	2	3	3	0	0	0	0	0	0	0	0	0	0	0	0	0	0	p__Proteobacteria					0.347826
OTU_333	0	0	2	1	13	63	1	13	2	5	5	0	0	0	0	0	0	0	0	7	0	0	0	p__Proteobacteria					0.347826
OTU_334	0	1	0	1	1	0	1	2	2	7	1	0	0	0	0	0	24	0	0	8	30	3	16	p__Proteobacteria	c__Alphaproteobacteria	o__Rhizobiales	f__Phyllobacteriaceae	g__	0.347826
OTU_335	0	0	6	0	0	2	3	9	0	1	0	0	0	0	0	0	0	0	0	5	5	4	61	p__Proteobacteria					0.347826
OTU_336	0	0	0	0	5	1	0	0	0	0	0	0	1	16	13	0	2	37	0	3	9	0	6	p__Firmicutes					0.347826
OTU_337	0	1	15	0	0	1	2	30	12	14	8	0	0	0	0	0	0	0	0	0	3	0	2	p__Proteobacteria					0.347826
OTU_338	0	0	8	0	0	29	0	1	0	6	0	0	0	0	0	11	7	10	10	0	1	0	3	p__Proteobacteria					0.347826
OTU_339	23	1	21	0	8	13	1	11	2	2	3	0	0	0	0	0	0	0	0	0	0	0	0	p__Proteobacteria					0.347826
OTU_340	18	7	10	0	9	18	0	1	0	1	0	0	0	0	0	0	0	0	0	7	5	3	0	p__Proteobacteria					0.347826
OTU_341	1	0	5	0	0	11	0	0	0	7	0	0	0	0	0	8	34	0	0	0	5	2	3	p__Proteobacteria					0.347826
OTU_342	0	0	2	1	1	25	0	11	0	13	0	0	0	0	0	0	0	0	0	2	5	3	12	p__Actinobacteria					0.347826
OTU_343	0	0	22	0	0	2	1	13	0	1	10	0	0	0	0	0	0	0	0	3	2	6	10	p__Proteobacteria					0.347826
OTU_344	0	0	2	0	0	3	1	1	8	6	2	0	0	0	0	0	1	0	0	0	3	2	32	p__Proteobacteria	c__Gammaproteobacteria	o__Pseudomonadales	f__Pseudomonadaceae	g__Pseudomonas	0.347826
OTU_345	0	0	32	4	0	2	2	7	1	2	1	0	0	0	0	0	0	0	0	0	3	1	4	p__Proteobacteria	c__Gammaproteobacteria	o__Enterobacteriales	f__Enterobacteriaceae	g__	0.347826
OTU_346	0	0	17	0	0	2	0	4	2	1	4	0	0	0	0	0	0	0	0	3	10	1	12	p__Proteobacteria					0.347826
OTU_347	0	0	26	4	2	2	0	1	0	0	3	0	0	0	0	0	0	0	0	4	4	1	5	p__Proteobacteria					0.347826
OTU_348	1	2	15	0	0	15	0	1	0	2	0	0	0	5	3	0	0	3	0	0	0	0	2	p__Proteobacteria					0.347826
OTU_349	0	2	5	3	0	1	0	0	0	2	0	1	1	12	0	0	2	12	5	1	0	0	0	p__Proteobacteria	c__Betaproteobacteria	o__Burkholderiales	f__Comamonadaceae	g__	0.347826
OTU_350	0	0	0	0	0	2	0	0	0	0	0	2	2	10	9	0	0	6	0	2	1	0	2	p__Proteobacteria					0.347826
OTU_351	2	2	5	0	2	8	1	0	1	3	0	0	0	0	0	2	1	0	0	5	0	0	1	p__Proteobacteria	c__Betaproteobacteria	o__Burkholderiales	f__Oxalobacteraceae		0.347826
OTU_352	0	0	1	0	1	50	0	1	1	1513	0	0	0	1	0	46	48	2818	2124	0	0	11	0	p__Bacteroidetes	c__Flavobacteriia	o__Flavobacteriales	f__Cryomorphaceae	g__Fluviicola	0.304348
OTU_353	0	7	9	1	0	82	1	2	61	16	3590	0	0	0	0	0	0	0	0	0	0	0	0	p__Proteobacteria					0.304348
OTU_354	0	0	1	2	0	2	1	0	0	190	0	0	0	0	0	0	0	0	1	474	841	238	901	p__Proteobacteria	c__Gammaproteobacteria	o__Pseudomonadales	f__Moraxellaceae	g__Acinetobacter	0.304348
OTU_355	0	2	3	1	14	2553	4	6	2	1	1	0	0	0	0	0	0	0	0	0	0	0	0						0.304348
OTU_356	0	0	0	0	0	0	0	0	0	2	0	0	0	0	0	101	280	1379	410	16	24	0	0	p__Proteobacteria					0.304348
OTU_357	0	0	0	0	0	1442	1	0	0	4	1	0	0	0	0	1	0	144	32	14	29	0	9	p__Bacteroidetes					0.304348
OTU_358	0	0	0	0	0	487	0	1	0	2	0	0	0	0	0	113	175	381	145	0	12	0	0	p__Proteobacteria					0.304348
OTU_359	3	2	4	0	0	0	0	2	3	1	1261	0	0	0	0	0	0	0	0	2	0	1	0	p__Proteobacteria					0.304348
OTU_360	0	5	11	1	3	1	1	6	11	860	0	0	0	0	135	0	0	0	0	0	0	0	0	p__Proteobacteria					0.304348
OTU_361	0	0	1	0	0	42	0	0	0	16	0	0	0	0	715	122	0	0	0	7	17	7	1	p__Actinobacteria					0.304348
OTU_362	0	0	0	0	0	0	0	0	0	3	0	0	0	0	0	311	240	205	93	0	4	5	0	p__Bacteroidetes					0.304348
OTU_363	0	0	0	0	0	58	0	0	0	40	1	0	0	0	0	126	408	110	0	0	30	32	0	p__Bacteroidetes					0.304348
OTU_364	0	1	6	5	0	30	129	433	21	115	0	0	0	0	0	0	0	0	0	0	0	0	1	p__Proteobacteria					0.304348
OTU_365	0	0	2	0	0	1	0	0	2	0	546	0	0	0	0	1	0	0	0	16	33	11	84	p__Proteobacteria					0.304348
OTU_366	0	0	9	1	0	5	72	191	1	342	0	0	0	0	0	0	0	0	0	0	2	0	2	p__Proteobacteria					0.304348
OTU_367	0	0	0	0	0	148	1	9	1	0	0	0	0	0	2	7	122	35	268	1	0	0	1	p__Bacteroidetes	c__Flavobacteriia	o__Flavobacteriales	f__Flavobacteriaceae	g__Flavobacterium	0.304348
OTU_368	0	0	4	4	1	27	116	356	10	64	0	0	0	0	0	0	0	0	0	1	0	0	1	p__Proteobacteria					0.304348
OTU_369	0	1	0	0	0	88	0	0	0	0	0	0	0	0	0	6	104	0	0	135	141	46	63	p__Bacteroidetes					0.304348
OTU_370	25	78	34	413	0	2	2	0	20	1	0	0	1	0	0	0	0	0	1	1	0	0	0	p__Proteobacteria	c__Gammaproteobacteria	o__Xanthomonadales	f__Xanthomonadaceae	g__	0.304348
OTU_371	0	0	0	0	0	0	0	0	0	4	0	0	0	0	0	74	52	292	78	1	48	0	6	p__Proteobacteria					0.304348
OTU_372	0	0	1	0	1	0	0	0	1	91	1	0	0	0	0	118	166	0	39	75	1	2	11	p__Bacteroidetes	c__Flavobacteriia	o__Flavobacteriales	f__Flavobacteriaceae	g__	0.304348
OTU_373	56	2	26	0	0	1	3	9	396	0	1	0	0	0	0	0	0	0	0	0	0	4	0	p__Proteobacteria					0.304348
OTU_374	0	0	0	0	1	141	0	1	0	318	0	0	0	0	2	3	0	0	0	0	4	20	2	p__Actinobacteria					0.304348
OTU_375	0	1	110	1	0	1	66	272	1	20	0	0	0	0	0	0	0	0	0	1	2	4	3	p__Proteobacteria	c__Gammaproteobacteria	o__Enterobacteriales	f__Enterobacteriaceae		0.304348
OTU_376	0	0	0	0	0	1	0	0	0	49	0	0	0	1	0	127	198	0	75	2	2	3	0	p__Bacteroidetes					0.304348
OTU_377	0	0	0	0	0	0	0	1	0	3	0	0	0	0	0	0	0	228	2	27	125	19	32	p__Bacteroidetes					0.304348
OTU_378	0	0	2	4	0	1	0	0	0	5	0	0	0	0	0	0	0	0	0	94	129	21	153	p__Proteobacteria					0.304348
OTU_379	0	0	0	0	1	151	3	4	0	176	0	0	0	0	0	0	0	0	0	0	5	33	21	p__Firmicutes					0.304348
OTU_380	0	0	0	0	0	0	0	0	0	0	0	0	0	0	0	47	93	148	31	9	7	0	10	p__Proteobacteria					0.304348
OTU_381	0	0	0	0	0	0	0	0	0	2	0	0	0	0	0	203	108	16	8	0	2	3	0	p__Bacteroidetes					0.304348
OTU_382	0	0	0	1	0	0	0	0	0	6	1	0	0	0	0	0	0	94	159	19	35	7	19	p__Bacteroidetes					0.304348
OTU_383	6	278	28	0	0	1	0	1	3	0	1	0	0	1	0	0	0	2	0	1	3	6	0	p__Proteobacteria	c__Gammaproteobacteria	o__Xanthomonadales	f__Xanthomonadaceae	g__Stenotrophomonas	0.304348
OTU_384	1	2	3	0	2	0	0	279	0	30	2	0	0	0	0	0	0	0	0	0	0	0	4	p__Proteobacteria					0.304348
OTU_385	143	2	99	1	1	22	0	0	2	0	0	1	0	0	0	0	0	0	2	0	0	0	44	p__Proteobacteria					0.304348
OTU_386	0	0	4	9	0	2	58	133	71	38	0	0	0	0	0	0	0	0	0	0	0	1	0	p__Proteobacteria					0.304348
OTU_387	0	0	8	4	1	0	42	223	5	3	6	0	0	0	0	0	0	0	0	0	0	0	0	p__Proteobacteria					0.304348
OTU_388	13	0	1	0	4	0	0	0	0	0	0	0	48	0	160	2	46	0	0	0	0	0	5	p__Firmicutes					0.304348
OTU_389	0	0	0	0	0	0	0	0	0	35	0	0	0	0	0	46	52	0	0	18	31	83	6	p__Proteobacteria					0.304348
OTU_390	81	9	59	0	72	35	0	3	1	3	0	0	0	0	0	0	0	0	0	0	0	0	0	p__Proteobacteria					0.304348
OTU_391	134	2	109	1	0	7	0	2	0	2	2	0	1	0	0	0	0	0	0	0	0	0	0	p__Proteobacteria					0.304348
OTU_392	0	0	0	0	0	0	0	0	0	4	0	0	0	0	0	132	44	0	28	33	11	4	0	p__Proteobacteria					0.304348
OTU_393	5	0	1	0	37	0	0	1	1	3	1	0	8	1	1	0	1	138	25	21	0	1	0	p__Proteobacteria	c__Alphaproteobacteria	o__Caulobacterales	f__Caulobacteraceae	g__	0.304348
OTU_394	0	139	0	32	0	5	0	0	4	0	43	1	0	2	0	0	17	0	0	0	0	0	0	p__Proteobacteria					0.304348
OTU_395	1	0	99	0	1	2	0	2	0	0	103	0	0	0	0	0	0	0	0	1	10	5	16	p__Proteobacteria					0.304348
OTU_396	0	0	0	0	1	109	0	2	0	10	0	0	0	0	0	0	1	60	0	3	21	1	6	p__Proteobacteria					0.304348
OTU_397	10	0	44	0	0	20	0	1	1	24	0	0	0	23	0	0	0	43	0	42	1	0	0	p__Proteobacteria					0.304348
OTU_398	0	0	122	0	63	4	5	4	0	0	4	0	0	0	0	0	0	0	0	1	1	0	2	p__Proteobacteria					0.304348
OTU_399	28	15	32	1	6	109	0	1	2	1	7	0	0	0	0	0	0	1	0	0	0	0	0	p__Proteobacteria	c__Gammaproteobacteria	o__Pseudomonadales	f__Moraxellaceae	g__Acinetobacter	0.304348
OTU_400	0	0	0	0	0	89	0	0	0	31	0	0	0	1	0	0	35	0	0	19	9	7	8	p__Bacteroidetes					0.304348
OTU_401	41	17	48	0	15	58	0	7	1	3	0	0	0	0	0	0	0	0	0	0	1	0	0	p__Proteobacteria					0.304348
OTU_402	0	1	6	0	4	103	7	21	0	24	1	0	1	1	1	0	0	0	0	16	0	0	0	p__Bacteroidetes	c__Sphingobacteriia	o__Sphingobacteriales	f__Sphingobacteriaceae	g__Pedobacter	0.304348
OTU_403	27	38	23	1	19	64	0	1	1	0	0	0	0	0	0	0	4	0	0	5	0	0	0	p__Proteobacteria					0.304348
OTU_404	0	0	1	1	0	0	0	0	0	21	103	0	0	0	0	3	6	0	0	9	26	0	12	p__Proteobacteria					0.304348
OTU_405	36	15	34	0	20	69	4	3	1	0	0	0	0	0	0	0	0	0	0	0	0	0	0	p__Proteobacteria					0.304348
OTU_406	0	0	3	0	0	2	0	0	0	6	152	0	0	0	0	0	0	0	0	5	5	1	3	p__Proteobacteria					0.304348
OTU_407	0	0	0	0	0	0	0	0	0	46	0	0	0	0	0	3	30	0	32	18	17	0	7	p__Bacteroidetes					0.304348
OTU_408	32	15	37	0	13	47	0	4	1	3	0	0	0	0	0	0	0	0	0	0	0	0	0	p__Proteobacteria					0.304348
OTU_409	0	0	16	0	1	91	1	2	1	5	2	0	0	0	0	0	1	0	0	3	19	1	0	p__Proteobacteria	c__Alphaproteobacteria	o__Rhizobiales	f__Rhizobiaceae	g__Agrobacterium	0.304348
OTU_410	25	16	23	0	18	55	2	2	0	0	0	0	0	0	0	0	0	0	0	0	0	0	0	p__Proteobacteria					0.304348
OTU_411	0	0	97	0	0	0	1	0	0	2	0	0	0	0	0	0	11	1	0	2	13	6	7	p__Bacteroidetes					0.304348
OTU_412	0	0	0	1	0	103	1	1	0	7	0	0	0	1	0	8	6	3	4	1	2	0	0	p__Proteobacteria	c__Betaproteobacteria	o__Burkholderiales	f__Comamonadaceae		0.304348
OTU_413	58	2	39	0	0	7	0	1	0	0	0	0	0	0	0	0	0	0	0	2	0	4	24	p__Actinobacteria					0.304348
OTU_414	1	2	1	2	0	57	0	0	0	22	1	0	0	0	0	0	0	0	0	35	6	9	0	p__Proteobacteria					0.304348
OTU_415	0	0	0	0	0	0	0	0	0	0	0	0	0	0	0	5	24	27	8	0	42	5	23	p__Proteobacteria					0.304348
OTU_416	0	0	3	0	6	4	1	68	0	42	0	0	0	0	0	0	0	0	0	0	0	2	3	p__Proteobacteria					0.304348
OTU_417	13	12	23	0	1	29	0	4	0	0	0	0	16	0	1	0	0	0	0	1	0	1	26	p__Actinobacteria	c__Actinobacteria	o__Actinomycetales	f__Micrococcaceae	g__Renibacterium	0.304348
OTU_418	0	0	0	0	4	22	0	0	8	37	0	0	0	1	0	0	0	0	0	0	7	41	6	p__Actinobacteria					0.304348
OTU_419	0	0	0	0	0	0	0	0	0	0	0	0	0	0	0	16	69	12	3	0	7	5	13	p__Proteobacteria					0.304348
OTU_420	0	0	3	1	1	99	0	3	0	7	1	0	0	0	0	0	0	0	0	2	2	3	0	p__Proteobacteria					0.304348
OTU_421	0	0	83	0	0	7	1	2	0	0	1	0	0	0	0	0	0	0	0	5	6	2	12	p__Proteobacteria					0.304348
OTU_422	0	0	33	0	0	4	4	24	2	39	0	0	0	0	0	0	0	1	0	1	1	0	7	p__Proteobacteria					0.304348
OTU_423	0	0	93	2	0	1	2	5	0	2	0	0	0	0	0	0	0	0	0	2	7	0	1	p__Proteobacteria					0.304348
OTU_424	0	0	45	0	0	0	3	13	0	31	0	0	0	0	0	0	0	0	0	0	7	3	8	p__Proteobacteria					0.304348
OTU_425	0	0	10	24	0	0	9	37	24	2	0	0	0	0	0	0	0	0	0	0	3	0	0	p__Proteobacteria					0.304348
OTU_426	51	1	37	0	0	3	1	0	2	0	3	0	0	0	0	0	5	0	0	0	0	0	4	p__Proteobacteria					0.304348
OTU_427	0	0	2	0	0	6	0	1	0	19	55	0	0	0	1	1	0	0	0	6	4	0	11	p__Proteobacteria					0.304348
OTU_428	0	0	0	0	0	0	33	0	0	6	0	0	0	0	0	0	22	0	0	25	4	6	9	p__Proteobacteria					0.304348
OTU_429	2	1	42	0	3	1	15	26	0	7	0	0	1	0	1	0	0	5	0	0	0	0	0	p__Proteobacteria	c__Betaproteobacteria	o__Burkholderiales	f__Oxalobacteraceae	g__Janthinobacterium	0.304348
OTU_430	0	0	3	0	9	4	0	41	0	39	0	0	0	0	0	0	0	0	0	0	0	2	2	p__Proteobacteria					0.304348
OTU_431	0	0	4	0	0	0	0	0	0	1	0	1	0	6	0	0	0	2	0	17	17	9	37	p__Proteobacteria					0.304348
OTU_432	17	10	18	0	6	32	1	1	2	2	1	0	0	0	0	0	0	0	0	0	0	0	0	p__Proteobacteria					0.304348
OTU_433	18	11	21	0	4	23	2	2	0	0	1	0	0	0	0	0	0	0	0	0	0	0	0	p__Proteobacteria					0.304348
OTU_434	0	0	0	0	0	10	0	0	0	18	0	0	0	0	0	3	20	5	2	0	0	0	24	p__Proteobacteria					0.304348
OTU_435	13	15	20	0	7	19	0	4	1	2	0	0	0	0	0	0	0	0	0	0	0	0	0	p__Proteobacteria					0.304348
OTU_436	0	0	0	0	1	0	0	1	0	1	0	2	0	22	0	0	6	30	0	0	7	3	4	p__Proteobacteria					0.304348
OTU_437	0	0	0	0	1	1	0	0	0	17	2	0	0	1	0	4	3	0	0	21	23	0	3	p__Proteobacteria					0.304348
OTU_438	0	0	0	0	0	21	0	1	0	1	0	0	0	0	0	13	13	19	0	3	2	2	0	p__Proteobacteria					0.304348
OTU_439	16	9	24	0	6	8	1	8	1	2	0	0	0	0	0	0	0	0	0	0	0	0	0	p__Proteobacteria					0.304348
OTU_440	5	0	6	0	4	13	0	0	0	4	0	0	0	0	0	0	0	38	0	0	0	0	5	p__Firmicutes					0.304348
OTU_441	0	0	0	0	0	12	0	0	0	5	0	0	0	0	0	3	1	0	0	10	23	3	14	p__Proteobacteria					0.304348
OTU_442	9	0	3	0	0	1	0	1	3	4	38	0	0	0	0	0	0	0	0	5	1	0	5	p__Proteobacteria					0.304348
OTU_443	0	0	0	0	0	3	0	1	0	38	2	0	0	0	0	1	2	0	0	4	7	0	11	p__Proteobacteria					0.304348
OTU_444	0	1	0	0	1	14	0	0	0	22	0	0	0	0	0	3	2	2	0	0	16	3	1	p__Bacteroidetes					0.304348
OTU_445	0	0	0	16	0	0	0	1	0	0	0	4	0	29	0	3	0	0	2	3	3	0	0	p__Proteobacteria					0.304348
OTU_446	20	0	5	0	0	3	0	0	3	1	2	0	0	0	0	1	0	0	0	1	10	0	14	p__Proteobacteria					0.304348
OTU_447	0	0	0	0	0	0	2	4	32	13	0	0	0	0	0	0	0	0	0	3	0	3	3	p__Proteobacteria					0.304348
OTU_448	0	0	0	0	0	0	0	0	0	0	0	3	6	17	16	2	1	9	3	1	1	0	0	p__Proteobacteria					0.304348
OTU_449	0	0	9	0	0	3	1	14	0	7	0	0	0	0	0	10	10	4	0	0	1	0	0	p__Proteobacteria					0.304348
OTU_450	2	0	2	0	24	4	0	0	0	0	0	0	11	0	1	0	0	0	2	0	0	0	13	p__Proteobacteria					0.304348
OTU_451	0	0	2	0	0	15	0	4	0	9	1	0	0	1	0	0	1	0	0	12	8	1	3	p__Bacteroidetes	c__Flavobacteriia	o__Flavobacteriales	f__Flavobacteriaceae	g__Flavobacterium	0.304348
OTU_452	1	1	6	1	3	8	0	1	0	7	0	0	0	1	0	0	0	12	7	0	0	5	1	p__Proteobacteria	c__Betaproteobacteria	o__Burkholderiales	f__Comamonadaceae		0.304348
OTU_453	6	4	16	0	3	13	1	5	1	2	0	0	0	0	0	0	0	0	0	0	0	0	0	p__Proteobacteria					0.304348
OTU_454	0	4	0	0	0	1	0	0	0	12	0	0	0	0	0	1	9	0	2	2	1	10	8	p__Proteobacteria					0.304348
OTU_455	0	0	0	0	1	5	8	19	1	3	2	0	0	0	0	0	0	0	0	1	3	0	4	p__Proteobacteria					0.304348
OTU_456	10	2	7	0	0	2	0	0	0	0	0	0	9	1	3	0	0	0	0	0	0	0	11	p__Actinobacteria					0.304348
OTU_457	0	3	2	3	0	1	0	16	4	6	6	0	0	0	0	0	0	1	0	0	0	0	0	p__Proteobacteria					0.304348
OTU_458	7	2	21	0	3	5	2	0	0	2	0	0	0	0	0	0	0	0	0	0	0	0	0	p__Proteobacteria					0.304348
OTU_459	0	0	0	0	1	0	0	0	0	0	0	0	0	0	0	2	21	0	2	3	6	2	4	p__Proteobacteria					0.304348
OTU_460	0	0	6	0	0	1	9	12	0	3	0	0	0	0	0	0	0	0	0	2	2	0	6	p__Proteobacteria					0.304348
OTU_461	0	0	0	0	0	4	0	0	0	0	0	0	0	0	0	0	0	13	3	3	5	3	3	p__Actinobacteria					0.304348
OTU_462	1	0	2	0	0	0	0	0	2	8	2	0	0	0	0	5	6	0	0	1	2	0	1	p__Proteobacteria					0.304348
OTU_463	3	0	5	1	2	2	0	5	0	0	2	0	0	0	0	0	0	0	0	1	2	0	0	p__Proteobacteria					0.304348
OTU_464	0	0	0	0	0	0	0	0	0	2	3	0	0	0	0	4	2	0	0	2	3	1	3	p__Proteobacteria					0.304348
OTU_465	2	1	37	1	0	2522	1	52	0	11	3	0	0	0	0	0	0	0	0	0	0	0	0	p__Firmicutes					0.26087
OTU_466	0	0	0	0	0	0	0	0	0	0	0	1	1	0	0	1217	877	389	5	23	0	0	7	p__Proteobacteria					0.26087
OTU_467	1	0	1	198	0	7	0	0	0	0	0	0	0	0	4	586	1414	0	121	0	1	0	0	p__Proteobacteria					0.26087
OTU_468	0	0	0	0	0	0	0	0	0	0	0	0	1	0	1	610	463	950	61	0	8	0	2	p__Proteobacteria					0.26087
OTU_469	0	0	0	0	0	0	0	0	0	0	0	20	1	0	16	0	0	1	0	108	60	1571	60	p__Proteobacteria					0.26087
OTU_470	0	0	0	0	1	1171	1	0	0	1	1	0	0	0	0	154	270	3	50	0	35	0	0	p__Proteobacteria					0.26087
OTU_471	0	0	0	0	0	0	0	0	0	3	0	0	0	0	0	599	456	497	9	4	0	0	0	p__Proteobacteria					0.26087
OTU_472	37	3	45	0	892	47	0	0	0	2	1	0	0	0	0	0	0	0	0	0	0	0	0	p__Proteobacteria					0.26087
OTU_473	0	0	0	0	0	0	0	0	2	1	0	5	8	519	0	0	0	349	0	0	0	1	2	p__Proteobacteria					0.26087
OTU_474	22	2	14	0	599	28	0	1	0	3	1	0	0	0	0	0	0	0	0	0	0	0	0	p__Proteobacteria					0.26087
OTU_475	0	0	0	0	4	73	470	92	0	14	0	0	0	0	1	0	0	0	0	5	0	0	1	p__Firmicutes					0.26087
OTU_476	0	0	7	1	0	0	0	0	0	18	0	0	0	0	0	0	0	0	0	100	233	35	233	p__Proteobacteria					0.26087
OTU_477	0	0	1	0	0	0	0	0	2	11	0	0	0	0	0	484	92	17	0	0	2	0	1	p__Proteobacteria					0.26087
OTU_478	0	0	86	0	0	0	0	0	0	4	0	0	0	0	0	0	0	0	0	164	111	48	115	p__Proteobacteria					0.26087
OTU_479	0	0	0	0	0	0	0	0	0	0	0	0	0	0	0	163	271	0	14	17	14	10	0	p__Proteobacteria					0.26087
OTU_480	0	0	0	0	0	1	0	0	0	1	0	0	0	364	1	0	0	0	4	4	3	82	10	p__Actinobacteria					0.26087
OTU_481	0	0	0	0	0	22	1	1	0	1	28	0	0	0	0	0	0	0	0	86	139	33	109	p__Proteobacteria					0.26087
OTU_482	34	1	9	0	2	0	0	0	186	2	181	0	0	0	0	0	0	0	0	0	0	0	0	p__Proteobacteria					0.26087
OTU_483	1	0	0	0	0	18	0	1	0	2	1	0	0	0	0	0	0	0	0	198	51	54	65	p__Proteobacteria					0.26087
OTU_484	0	0	23	0	0	12	0	3	1	0	1	0	0	0	323	0	2	0	0	11	0	0	0	p__Actinobacteria					0.26087
OTU_485	0	0	0	0	0	0	0	0	0	6	0	0	0	0	0	1	27	0	0	69	111	17	133	p__Proteobacteria					0.26087
OTU_486	36	1	11	0	0	0	3	1	181	1	118	0	0	0	1	0	0	0	0	3	0	0	0	p__Proteobacteria					0.26087
OTU_487	0	1	0	0	1	3	0	1	0	5	302	0	0	0	0	0	0	0	0	1	12	3	6	p__Proteobacteria					0.26087
OTU_488	0	0	301	2	6	2	5	4	0	0	0	0	0	0	0	0	0	0	0	0	0	0	1	p__Proteobacteria					0.26087
OTU_489	7	24	10	0	257	20	0	2	0	0	0	0	0	0	0	0	0	0	0	0	0	0	0	p__Proteobacteria					0.26087
OTU_490	0	0	0	0	0	1	0	0	0	2	0	144	0	0	116	0	0	0	0	3	2	42	0	p__Proteobacteria					0.26087
OTU_491	3	0	185	0	0	101	1	6	0	0	0	0	0	0	0	0	0	0	0	5	0	2	0	p__Proteobacteria					0.26087
OTU_492	0	0	0	0	0	0	0	0	0	56	0	0	0	1	0	120	45	0	44	34	3	0	0	p__Proteobacteria					0.26087
OTU_493	0	0	0	0	0	0	0	0	0	3	0	0	0	0	0	0	2	0	0	71	100	44	73	p__Proteobacteria					0.26087
OTU_494	0	1	2	1	8	88	1	1	0	158	1	0	0	0	0	0	0	0	0	0	19	2	0	p__Proteobacteria	c__Betaproteobacteria	o__Burkholderiales	f__Comamonadaceae	g__	0.26087
OTU_495	0	0	0	0	0	0	0	0	0	40	0	0	0	0	1	123	16	72	22	0	0	0	2	p__Proteobacteria					0.26087
OTU_496	0	0	0	1	0	0	0	0	0	67	0	0	0	0	0	0	105	0	0	14	46	24	9	p__Bacteroidetes					0.26087
OTU_497	0	0	0	0	0	0	0	1	0	98	0	0	0	0	0	0	80	0	0	33	31	7	14	p__Proteobacteria					0.26087
OTU_498	0	0	0	0	0	5	0	0	0	4	0	0	0	0	0	0	1	0	5	6	2	0	228	p__Proteobacteria					0.26087
OTU_499	0	0	0	0	0	1	0	0	0	0	95	0	0	0	0	0	0	4	0	27	59	27	36	p__Proteobacteria					0.26087
OTU_500	0	0	1	0	0	122	0	0	0	5	0	0	0	0	0	0	0	0	0	4	13	20	82	p__Proteobacteria					0.26087
OTU_501	0	0	75	0	1	132	1	22	0	9	0	0	0	0	0	3	0	1	0	0	0	0	2	p__Proteobacteria					0.26087
OTU_502	0	0	0	0	0	10	0	0	0	1	0	0	0	0	0	0	0	201	0	21	3	6	4	p__Bacteroidetes					0.26087
OTU_503	0	0	2	16	0	0	32	103	83	4	0	0	0	0	0	0	0	0	0	0	0	0	0	p__Proteobacteria					0.26087
OTU_504	3	0	167	0	0	41	2	11	0	9	1	0	0	0	0	0	0	0	0	1	0	0	0	p__Proteobacteria					0.26087
OTU_505	0	0	0	0	0	0	0	4	0	75	0	0	0	0	0	0	0	0	0	22	74	11	44	p__Proteobacteria					0.26087
OTU_506	119	6	67	0	4	28	1	1	0	2	0	0	0	0	0	0	0	0	0	0	0	0	1	p__Proteobacteria					0.26087
OTU_507	0	0	193	2	3	3	9	15	0	0	0	0	0	0	0	0	0	0	0	0	1	0	0	p__Proteobacteria					0.26087
OTU_508	0	0	9	0	0	2	28	75	1	94	0	1	0	0	0	0	0	0	0	0	0	0	9	p__Proteobacteria					0.26087
OTU_509	0	0	9	9	0	0	1	21	3	8	164	0	0	0	0	0	0	0	0	1	0	0	0	p__Proteobacteria					0.26087
OTU_510	68	1	124	0	0	8	0	0	0	4	5	0	0	0	0	0	0	0	0	1	4	0	0	p__Proteobacteria					0.26087
OTU_511	0	0	0	0	0	0	0	0	0	64	0	0	0	0	0	2	3	134	7	2	0	0	0	p__Proteobacteria					0.26087
OTU_512	78	9	55	0	5	59	0	0	2	0	1	0	0	0	0	0	0	0	0	0	0	0	0	p__Proteobacteria					0.26087
OTU_513	98	1	70	0	0	24	2	1	0	1	0	0	0	0	0	0	0	0	0	5	0	0	4	p__Proteobacteria					0.26087
OTU_514	0	0	0	0	0	0	0	0	0	8	0	0	0	0	0	0	3	0	0	51	70	5	62	p__Proteobacteria					0.26087
OTU_515	0	0	1	0	0	0	0	0	0	1	0	0	0	0	0	4	61	0	0	21	45	7	52	p__Proteobacteria					0.26087
OTU_516	0	1	0	0	0	1	1	0	0	0	0	0	0	0	0	0	8	88	71	0	7	2	2	p__Bacteroidetes					0.26087
OTU_517	17	0	86	0	1	1	0	1	0	4	51	0	0	0	0	0	0	0	0	2	6	1	1	p__Proteobacteria	c__Gammaproteobacteria	o__Pseudomonadales	f__Pseudomonadaceae	g__Pseudomonas	0.26087
OTU_518	9	0	85	1	2	29	2	1	0	37	0	0	0	0	0	0	0	0	0	0	0	1	0	p__Proteobacteria					0.26087
OTU_519	0	1	18	43	1	4	0	1	0	9	87	0	0	0	0	0	0	0	0	0	2	0	0	p__Proteobacteria					0.26087
OTU_520	4	48	5	0	40	65	1	1	0	2	0	0	0	0	0	0	0	0	0	0	0	0	0	p__Proteobacteria					0.26087
OTU_521	23	0	2	0	0	119	0	1	0	1	0	0	1	0	2	1	0	0	0	0	4	0	2	p__Proteobacteria					0.26087
OTU_522	2	0	2	0	0	0	0	0	0	0	0	0	0	0	0	0	1	0	0	33	60	2	52	p__Proteobacteria					0.26087
OTU_523	36	12	42	0	11	41	0	3	1	1	0	0	0	0	0	0	0	0	0	0	0	0	0	p__Proteobacteria					0.26087
OTU_524	0	0	0	0	0	0	0	5	0	67	0	0	0	1	0	0	0	0	0	10	33	6	17	p__Proteobacteria					0.26087
OTU_525	0	0	1	0	0	0	0	0	4	31	0	0	0	0	0	19	0	2	0	22	58	1	0	p__Bacteroidetes					0.26087
OTU_526	47	12	19	0	13	42	0	1	2	1	0	0	0	0	0	0	0	0	0	0	0	0	0	p__Proteobacteria					0.26087
OTU_527	33	18	20	0	6	56	1	2	0	0	0	0	0	0	0	0	0	0	0	0	0	0	0	p__Proteobacteria					0.26087
OTU_528	0	0	7	0	1	0	0	4	0	103	0	0	0	0	0	0	0	0	0	11	0	2	4	p__Proteobacteria					0.26087
OTU_529	32	5	32	0	15	38	0	1	2	1	1	0	0	0	0	0	0	0	0	0	0	0	0	p__Proteobacteria					0.26087
OTU_530	0	0	0	0	0	0	0	0	0	0	0	1	2	98	2	0	17	2	1	3	0	0	0	p__Firmicutes					0.26087
OTU_531	0	0	47	0	1	20	18	32	0	3	3	0	0	0	0	0	0	0	0	1	0	0	0	p__Proteobacteria					0.26087
OTU_532	0	0	0	0	0	56	0	0	0	12	0	0	0	0	0	0	0	0	0	2	3	10	35	p__Proteobacteria					0.26087
OTU_533	38	1	30	1	0	10	0	2	1	1	0	0	0	0	0	0	0	0	0	0	2	0	30	p__Actinobacteria					0.26087
OTU_534	5	0	25	0	2	0	1	8	0	4	70	0	0	0	0	0	0	0	0	0	0	0	1	p__Proteobacteria					0.26087
OTU_535	0	0	3	0	0	1	0	1	0	2	1	0	0	0	0	0	0	0	0	13	35	9	48	p__Proteobacteria					0.26087
OTU_536	10	69	13	1	1	0	0	1	7	4	1	0	0	0	0	0	5	0	0	0	0	0	0	p__Proteobacteria					0.26087
OTU_537	0	0	1	0	1	33	0	1	0	27	0	0	0	0	0	0	27	0	3	3	15	0	0	p__Proteobacteria					0.26087
OTU_538	8	61	18	0	0	0	2	2	16	0	1	0	0	0	0	0	0	0	0	0	0	0	0	p__Proteobacteria					0.26087
OTU_539	0	0	0	0	0	1	0	0	0	0	0	0	1	2	20	17	0	42	21	2	0	0	0	p__Actinobacteria					0.26087
OTU_540	23	13	17	0	13	32	1	1	0	3	0	0	0	0	0	0	0	0	0	0	0	0	0	p__Proteobacteria					0.26087
OTU_541	0	0	0	2	0	0	0	0	0	18	0	0	0	0	0	0	0	0	0	15	30	4	32	p__Proteobacteria					0.26087
OTU_542	20	1	58	0	0	0	0	0	0	5	6	0	0	0	0	0	0	0	0	3	3	0	0	p__Proteobacteria					0.26087
OTU_543	4	71	4	0	0	3	0	0	7	0	2	0	0	0	0	0	0	0	0	0	0	0	0	p__Proteobacteria					0.26087
OTU_544	0	0	1	33	0	0	5	31	2	15	0	0	0	0	0	0	0	0	0	0	0	2	0	p__Proteobacteria					0.26087
OTU_545	0	0	8	47	0	0	7	12	12	2	1	0	0	0	0	0	0	0	0	0	0	0	0	p__Proteobacteria					0.26087
OTU_546	15	8	14	1	4	40	1	1	0	1	2	0	0	0	0	0	0	0	0	0	0	1	0	p__Proteobacteria	c__Betaproteobacteria	o__Burkholderiales	f__Oxalobacteraceae	g__	0.26087
OTU_547	25	10	15	0	4	31	0	0	0	3	0	0	0	0	0	0	0	0	0	0	0	0	0	p__Proteobacteria					0.26087
OTU_548	0	0	0	0	0	1	0	0	0	63	0	0	0	0	0	2	2	4	1	3	8	1	1	p__Proteobacteria					0.26087
OTU_549	0	0	4	0	0	0	1	3	0	41	0	0	0	0	0	0	0	0	0	18	1	4	13	p__Proteobacteria					0.26087
OTU_550	0	0	61	0	10	3	4	5	0	2	0	0	0	0	0	0	0	0	0	0	0	0	0	p__Proteobacteria					0.26087
OTU_551	22	11	19	0	2	25	0	0	1	3	1	0	0	0	0	0	0	0	0	0	0	0	0	p__Proteobacteria					0.26087
OTU_552	0	0	22	4	1	0	20	26	2	8	1	0	0	0	0	0	0	0	0	0	0	0	0	p__Proteobacteria					0.26087
OTU_553	0	0	0	0	10	55	0	0	0	10	0	0	0	0	0	0	0	0	0	2	5	0	2	p__Proteobacteria					0.26087
OTU_554	0	0	1	20	0	0	2	1	0	32	1	0	0	0	0	0	0	0	0	4	7	0	13	p__Proteobacteria					0.26087
OTU_555	18	10	11	0	3	25	1	1	0	2	0	0	0	0	0	0	0	0	0	0	0	0	0	p__Proteobacteria					0.26087
OTU_556	0	0	0	0	0	0	0	1	0	3	0	0	0	0	0	2	56	0	0	2	4	0	3	p__Bacteroidetes					0.26087
OTU_557	0	1	1	1	0	0	0	2	0	0	0	0	2	1	42	1	1	0	9	2	1	1	4	p__Bacteroidetes	c__Flavobacteriia	o__Flavobacteriales	f__[Weeksellaceae]	g__Chryseobacterium	0.26087
OTU_558	0	0	0	0	0	0	0	0	0	3	0	0	0	0	0	0	32	0	0	7	17	8	2	p__Actinobacteria					0.26087
OTU_559	0	0	17	0	0	2	12	12	1	20	0	0	0	0	0	0	0	0	0	0	2	0	0	p__Proteobacteria					0.26087
OTU_560	0	0	5	0	10	0	0	0	0	5	40	0	0	0	0	0	0	0	0	0	2	2	1	p__Actinobacteria					0.26087
OTU_561	17	8	13	0	5	18	0	0	0	2	0	0	0	0	0	0	0	0	0	0	0	0	0	p__Proteobacteria					0.26087
OTU_562	16	4	16	0	2	21	0	0	1	2	0	0	0	0	0	0	0	0	0	0	0	0	0	p__Proteobacteria					0.26087
OTU_563	7	0	11	0	0	0	0	0	0	0	0	0	0	0	0	0	8	0	0	9	16	0	10	p__Actinobacteria					0.26087
OTU_564	0	1	4	0	1	5	1	0	0	2	0	0	0	1	26	6	12	1	0	0	0	0	0	p__Proteobacteria	c__Gammaproteobacteria	o__Pseudomonadales	f__Moraxellaceae	g__Acinetobacter	0.26087
OTU_565	0	0	2	0	1	12	0	0	0	14	0	1	0	1	0	1	0	0	0	2	0	23	3	p__Actinobacteria					0.26087
OTU_566	0	0	9	0	0	10	0	0	0	0	1	0	0	0	0	0	0	0	0	9	15	5	11	p__Proteobacteria					0.26087
OTU_567	0	0	0	0	2	3	0	0	0	0	0	0	0	0	0	0	0	0	0	4	12	3	36	p__Proteobacteria					0.26087
OTU_568	0	0	3	0	0	0	0	0	0	3	0	0	0	0	0	0	4	0	0	29	0	2	16	p__Proteobacteria					0.26087
OTU_569	0	0	0	0	0	0	0	0	0	5	0	0	0	0	0	0	2	23	17	0	6	3	0	p__Bacteroidetes					0.26087
OTU_570	0	0	2	0	0	0	0	3	0	0	0	0	0	0	0	0	0	0	0	31	10	5	2	p__Bacteroidetes					0.26087
OTU_571	3	35	5	0	0	2	0	0	4	2	0	0	0	0	0	0	0	0	0	0	0	0	0	p__Proteobacteria					0.26087
OTU_572	0	0	9	0	0	2	1	5	0	21	0	0	0	0	0	0	0	0	0	4	0	1	7	p__Proteobacteria					0.26087
OTU_573	0	0	0	0	0	0	0	0	0	1	0	0	0	0	0	13	3	0	21	3	7	2	0	p__Proteobacteria					0.26087
OTU_574	0	0	1	0	3	1	0	0	1	4	0	0	0	0	0	1	0	0	0	10	19	3	4	p__Proteobacteria					0.26087
OTU_575	0	0	3	0	0	0	1	0	0	0	9	0	0	0	0	0	0	0	0	3	10	9	12	p__Proteobacteria					0.26087
OTU_576	3	1	18	0	0	5	3	4	0	13	0	0	0	0	0	0	0	0	0	0	0	0	0	p__Proteobacteria					0.26087
OTU_577	11	4	9	0	4	16	0	3	0	0	0	0	0	0	0	0	0	0	0	0	0	0	0	p__Proteobacteria					0.26087
OTU_578	7	3	11	0	3	17	2	1	0	1	0	0	0	0	0	0	0	0	0	0	0	0	0	p__Proteobacteria					0.26087
OTU_579	15	0	5	0	11	0	0	0	0	5	0	1	4	0	0	0	0	0	3	0	0	0	0	p__Proteobacteria					0.26087
OTU_580	0	0	3	0	0	0	0	11	0	1	0	0	0	0	0	0	0	0	0	3	8	3	15						0.26087
OTU_581	2	2	5	0	0	5	0	0	0	1	0	0	5	1	0	0	0	0	0	0	1	0	20	p__Actinobacteria					0.26087
OTU_582	0	0	0	0	0	4	0	0	0	15	0	0	0	0	0	7	0	0	7	5	1	0	3	p__Proteobacteria					0.26087
OTU_583	0	1	6	0	0	0	0	0	0	4	0	0	0	0	0	0	18	0	0	3	6	4	0	p__Proteobacteria					0.26087
OTU_584	0	0	2	0	0	1	0	0	0	0	0	0	0	0	0	0	2	0	0	2	12	3	19	p__Proteobacteria					0.26087
OTU_585	0	0	0	0	0	0	0	0	0	0	0	0	0	0	0	3	4	0	0	7	13	5	8	p__Proteobacteria					0.26087
OTU_586	8	6	3	0	1	11	0	1	2	0	6	0	0	0	0	0	0	0	0	0	0	0	0	p__Proteobacteria					0.26087
OTU_587	0	1	1	0	0	1	0	8	3	1	5	0	0	0	0	0	0	0	0	3	3	11	0	p__Proteobacteria					0.26087
OTU_588	0	0	0	0	0	3	0	1	0	0	0	0	0	0	1	3	1	16	4	1	4	0	2	p__Proteobacteria					0.26087
OTU_589	0	0	3	0	3	18	0	0	0	1	0	0	1	0	0	0	2	0	0	0	6	0	2	p__Proteobacteria					0.26087
OTU_590	10	0	8	0	0	0	0	0	3	0	1	0	0	0	0	0	0	0	0	2	6	0	6	p__Proteobacteria					0.26087
OTU_591	0	0	0	0	0	0	2	14	3	9	1	0	0	0	0	0	0	0	0	2	3	0	1	p__Proteobacteria					0.26087
OTU_592	0	0	0	0	0	1	0	4	0	5	0	0	0	0	0	0	0	0	0	3	2	16	3	p__Actinobacteria					0.26087
OTU_593	0	0	2	0	0	0	0	0	0	3	0	0	0	0	0	0	0	0	0	4	14	3	8	p__Proteobacteria					0.26087
OTU_594	0	0	0	0	0	0	0	0	0	2	0	0	0	0	0	0	2	0	0	8	11	6	3	p__Proteobacteria					0.26087
OTU_595	0	0	0	0	0	0	0	0	0	0	0	3	2	0	7	1	0	4	0	0	4	0	10	p__Firmicutes					0.26087
OTU_596	0	0	0	0	0	0	0	0	0	7	0	0	0	0	0	3	0	2	0	6	8	1	4	p__Proteobacteria					0.26087
OTU_597	0	0	3	0	0	2	0	0	0	10	0	0	0	0	0	0	0	0	0	0	4	2	10	p__Proteobacteria					0.26087
OTU_598	0	0	0	0	0	0	0	0	0	0	0	1	3	6	11	0	0	1	3	2	0	2	1	p__Verrucomicrobia					0.26087
OTU_599	3	3	6	0	4	12	0	2	0	0	0	0	0	0	0	0	0	0	0	0	0	0	0	p__Proteobacteria					0.26087
OTU_600	8	2	6	0	3	9	0	2	0	0	0	0	0	0	0	0	0	0	0	0	0	0	0	p__Proteobacteria					0.26087
OTU_601	4	3	6	0	3	10	0	0	1	2	0	0	0	0	0	0	0	0	0	0	0	0	0	p__Proteobacteria					0.26087
OTU_602	0	1	3	0	0	1	0	1	0	3	0	0	0	0	0	8	5	2	0	0	0	0	4	p__Proteobacteria					0.26087
OTU_603	6	2	2	0	4	11	2	0	1	0	0	0	0	0	0	0	0	0	0	0	0	0	0	p__Proteobacteria					0.26087
OTU_604	0	0	0	0	0	1	1	0	0	0	8	0	0	0	0	0	0	2	0	5	5	2	3	p__Proteobacteria					0.26087
OTU_605	0	0	11	0	0	3	0	0	0	0	3	0	0	0	0	0	0	0	0	4	3	0	2	p__Proteobacteria					0.26087
OTU_606	0	0	0	0	10	0	0	0	0	0	0	0	3	1	3	2	0	1	2	0	2	0	1	p__Proteobacteria					0.26087
OTU_607	4	0	2	0	0	0	0	0	0	0	0	0	0	0	0	0	3	0	0	2	2	0	10	p__Proteobacteria					0.26087
OTU_608	0	2	7	0	0	0	3	0	0	0	0	0	0	0	0	0	0	0	0	2	3	3	1	p__Bacteroidetes					0.26087
OTU_609	0	0	0	0	0	0	0	0	0	1	0	0	1	2	1	0	0	2	0	2	3	3	5	p__Bacteroidetes					0.26087
OTU_610	0	9	6	1	0	1	0	0	5	2	3995	0	0	0	0	0	0	1	0	0	0	1	0	p__Proteobacteria					0.217391
OTU_611	0	3	9	0	1	1	0	1	1	7	2411	0	0	0	1	0	0	0	0	1	1	0	2	p__Proteobacteria	c__Gammaproteobacteria	o__Xanthomonadales	f__Xanthomonadaceae	g__	0.217391
OTU_612	0	0	25	0	2	616	0	0	0	0	0	0	0	0	1	0	0	1315	3	0	0	0	0	p__Bacteroidetes					0.217391
OTU_613	2	2	15	0	0	1	0	0	151	1	1468	0	0	0	0	0	0	0	0	0	0	0	0	p__Proteobacteria					0.217391
OTU_614	0	0	0	0	0	0	0	0	0	0	0	0	0	0	0	1005	447	0	90	4	5	1	0	p__Proteobacteria					0.217391
OTU_615	7	9	31	0	0	1	0	3	0	0	1214	0	0	0	0	0	0	0	0	0	0	0	0	p__Proteobacteria					0.217391
OTU_616	0	0	0	0	0	0	0	0	0	5	0	1	0	0	0	0	0	0	0	91	96	895	156	p__Proteobacteria					0.217391
OTU_617	0	1	20	1	1	9	41	117	1	818	0	0	0	0	0	0	0	0	0	0	0	1	0	p__Proteobacteria					0.217391
OTU_618	0	0	0	0	0	0	0	0	0	0	0	0	0	0	0	41	108	525	161	9	0	0	1	p__Proteobacteria					0.217391
OTU_619	0	0	101	677	0	2	3	3	0	0	1	0	0	0	0	0	0	0	0	0	0	0	0	p__Proteobacteria					0.217391
OTU_620	0	1	0	0	0	202	1	0	0	390	1	0	0	0	0	26	78	0	0	0	17	0	1	p__Bacteroidetes					0.217391
OTU_621	0	0	17	1	0	6	50	159	1	466	1	0	0	0	0	0	0	0	0	0	0	0	0	p__Proteobacteria					0.217391
OTU_622	0	0	4	0	0	0	0	5	0	0	0	0	0	0	0	606	50	23	1	0	0	0	0	p__Bacteroidetes					0.217391
OTU_623	0	0	4	0	1	597	0	2	0	29	1	0	0	0	1	0	0	0	0	0	0	0	5	p__Bacteroidetes					0.217391
OTU_624	0	0	0	0	1	219	0	0	1	14	0	0	0	0	0	143	31	0	140	0	0	0	1	p__Bacteroidetes					0.217391
OTU_625	0	0	0	0	0	0	0	0	0	24	0	0	0	0	0	231	271	0	0	0	13	0	2	p__Bacteroidetes					0.217391
OTU_626	0	0	1	0	4	0	0	30	0	1	0	0	0	0	0	155	287	0	26	0	0	0	0	p__Bacteroidetes					0.217391
OTU_627	0	0	0	0	1	0	0	0	0	0	0	0	1	0	0	0	0	0	5	5	8	3	471	p__Proteobacteria					0.217391
OTU_628	0	0	0	0	0	197	0	0	0	35	0	0	0	0	0	36	25	188	0	0	0	0	0	p__Bacteroidetes					0.217391
OTU_629	0	0	1	0	1	0	0	1	0	4	0	0	0	0	0	0	0	0	0	123	153	48	141	p__Proteobacteria					0.217391
OTU_630	0	0	0	0	0	2	0	1	0	1	1	0	0	0	0	0	0	0	0	96	139	79	93	p__Bacteroidetes					0.217391
OTU_631	2	0	6	0	0	1	0	3	361	2	0	0	0	1	1	1	0	0	0	0	0	1	0	p__Proteobacteria					0.217391
OTU_632	0	0	15	0	3	327	0	16	1	1	0	0	0	0	0	0	0	0	7	0	0	0	0	p__Proteobacteria					0.217391
OTU_633	0	0	0	0	0	1	0	0	0	319	1	0	0	0	0	0	0	0	0	9	23	2	15	p__Proteobacteria					0.217391
OTU_634	142	11	106	0	7	70	0	1	0	0	0	0	0	0	0	0	0	0	0	0	0	0	0	p__Proteobacteria					0.217391
OTU_635	0	0	11	0	0	33	4	13	0	267	0	0	0	0	0	0	0	0	0	0	0	0	0	p__Proteobacteria					0.217391
OTU_636	0	1	57	1	0	7	43	112	0	93	0	0	0	0	0	0	0	0	0	1	0	0	0	p__Proteobacteria					0.217391
OTU_637	0	0	37	35	0	1	33	108	77	0	0	0	0	0	0	0	0	0	1	0	0	0	0	p__Proteobacteria					0.217391
OTU_638	0	0	0	0	0	0	0	0	0	0	0	0	0	0	0	43	91	123	30	0	0	0	4	p__Proteobacteria					0.217391
OTU_639	0	0	49	0	1	4	56	129	0	48	1	0	0	0	0	0	0	0	0	0	0	0	0	p__Proteobacteria					0.217391
OTU_640	0	1	9	1	3	0	1	2	1	11	1	0	0	0	257	0	0	0	0	0	0	0	0	p__Proteobacteria					0.217391
OTU_641	0	0	0	0	0	0	0	0	0	83	0	0	0	0	0	0	32	0	0	134	13	16	0	p__Proteobacteria					0.217391
OTU_642	0	0	0	0	0	11	0	0	0	0	0	0	0	0	0	34	29	132	67	0	1	0	1	p__Proteobacteria					0.217391
OTU_643	0	0	0	0	1	0	0	0	0	43	0	0	0	0	0	0	0	0	114	0	64	49	3	p__Bacteroidetes					0.217391
OTU_644	0	0	0	0	0	0	0	0	0	78	0	0	0	0	0	0	0	132	0	0	54	5	5	p__Proteobacteria					0.217391
OTU_645	0	0	0	0	1	201	0	0	1	3	0	0	0	1	0	0	1	1	0	31	0	26	2	p__Bacteroidetes					0.217391
OTU_646	77	6	73	0	1	7	1	0	0	0	0	0	0	0	0	0	0	0	1	1	0	0	80	p__Proteobacteria					0.217391
OTU_647	0	0	12	2	0	0	48	167	0	4	1	0	0	0	0	0	0	0	0	0	0	0	0	p__Proteobacteria					0.217391
OTU_648	0	0	0	0	7	93	0	2	0	32	0	0	0	0	0	0	0	0	0	0	0	89	0	p__Actinobacteria					0.217391
OTU_649	0	0	0	0	0	0	0	0	0	0	0	0	0	0	3	0	0	0	0	10	8	187	10	p__Proteobacteria					0.217391
OTU_650	0	0	3	0	1	0	181	19	0	1	0	0	0	0	1	0	0	0	0	2	1	0	6						0.217391
OTU_651	0	0	2	0	0	18	116	51	0	27	0	0	0	1	0	0	0	0	0	0	0	0	0	p__Proteobacteria					0.217391
OTU_652	0	0	0	0	0	1	0	4	0	180	0	0	0	0	0	0	0	0	0	6	10	1	8	p__Proteobacteria					0.217391
OTU_653	0	0	6	0	0	1	0	7	0	3	174	0	0	0	0	0	0	0	0	0	1	5	0	p__Proteobacteria					0.217391
OTU_654	0	1	5	0	0	0	0	0	0	0	0	0	0	0	0	3	1	0	143	25	0	0	16	p__Proteobacteria					0.217391
OTU_655	0	0	8	3	0	0	0	7	1	4	161	0	0	0	0	0	0	0	0	0	0	1	0	p__Proteobacteria					0.217391
OTU_656	65	3	54	0	5	56	0	0	0	1	0	0	0	0	0	0	0	0	0	0	0	0	0	p__Proteobacteria					0.217391
OTU_657	0	0	0	0	1	6	0	0	0	89	1	0	0	0	0	0	33	0	0	0	21	0	8	p__Proteobacteria					0.217391
OTU_658	1	0	3	0	1	6	0	0	0	0	0	0	78	0	0	0	0	0	58	0	0	0	10	p__Proteobacteria					0.217391
OTU_659	81	1	65	0	0	5	2	2	0	0	0	0	0	0	0	0	0	0	0	0	0	0	1	p__Proteobacteria					0.217391
OTU_660	0	0	1	0	18	27	0	2	0	105	0	0	0	0	0	0	0	0	0	0	0	2	1	p__Proteobacteria					0.217391
OTU_661	3	0	0	0	1	0	0	0	0	0	0	0	30	0	99	1	20	0	0	0	0	0	2	p__Firmicutes					0.217391
OTU_662	23	0	19	1	0	8	0	0	0	0	0	0	0	0	0	0	0	0	0	4	1	1	98	p__Actinobacteria					0.217391
OTU_663	0	0	54	0	1	9	24	53	1	10	1	0	0	0	0	0	0	0	0	0	0	0	0	p__Proteobacteria					0.217391
OTU_664	0	2	3	45	1	1	1	3	89	0	0	0	0	0	0	0	0	0	0	0	0	0	0	p__Proteobacteria					0.217391
OTU_665	8	1	46	0	0	50	0	0	0	34	0	0	0	0	0	1	0	0	0	1	2	0	1	p__Proteobacteria					0.217391
OTU_666	0	0	0	0	0	10	0	0	0	83	0	0	0	0	0	0	0	0	0	16	0	13	21	p__Proteobacteria					0.217391
OTU_667	0	0	0	0	3	123	1	4	1	5	0	0	0	0	0	0	2	0	0	0	0	0	0	p__Bacteroidetes					0.217391
OTU_668	0	0	0	0	0	0	0	0	0	0	119	0	0	0	0	0	0	0	0	3	8	2	4	p__Proteobacteria					0.217391
OTU_669	1	0	0	88	0	0	15	23	0	5	1	0	0	0	0	0	0	0	0	2	0	0	0	p__Proteobacteria					0.217391
OTU_670	0	0	0	1	0	60	0	0	0	21	0	0	0	0	0	16	8	25	0	0	0	0	1	p__Bacteroidetes					0.217391
OTU_671	0	0	0	0	0	0	0	0	0	39	0	0	0	0	0	0	0	0	0	19	12	50	10	p__Bacteroidetes					0.217391
OTU_672	0	0	0	0	0	0	0	6	0	102	0	0	0	0	0	0	0	0	0	5	2	0	10	p__Proteobacteria					0.217391
OTU_673	0	0	5	0	0	0	21	92	0	3	0	0	0	0	0	0	0	0	0	0	0	0	2	p__Proteobacteria					0.217391
OTU_674	10	0	11	0	77	18	0	0	1	3	1	0	0	0	0	0	0	0	0	0	0	0	0	p__Proteobacteria					0.217391
OTU_675	28	0	32	0	0	2	0	0	2	0	1	0	0	0	0	0	0	0	1	1	0	0	52	p__Proteobacteria					0.217391
OTU_676	0	0	70	0	0	20	3	5	0	18	0	0	0	0	0	0	0	0	0	0	0	0	0	p__Proteobacteria					0.217391
OTU_677	47	3	52	2	0	9	0	0	0	0	0	0	0	0	1	0	0	0	0	0	0	0	0	p__Proteobacteria					0.217391
OTU_678	13	1	66	0	0	18	0	3	0	13	0	0	0	0	0	0	0	0	0	0	0	0	0	p__Proteobacteria					0.217391
OTU_679	0	0	8	0	0	1	1	30	17	31	22	0	0	0	0	0	0	0	0	0	0	0	1	p__Proteobacteria					0.217391
OTU_680	0	0	1	0	0	0	1	0	0	2	0	0	0	0	0	0	0	0	0	28	26	4	49	p__Proteobacteria					0.217391
OTU_681	0	0	0	0	0	0	0	0	1	0	0	0	0	0	0	1	8	90	0	2	0	4	2	p__Proteobacteria					0.217391
OTU_682	0	0	0	0	0	0	0	0	1	13	0	0	0	0	0	47	13	24	7	0	0	1	0	p__Proteobacteria					0.217391
OTU_683	0	0	0	0	0	60	0	0	0	0	0	0	0	0	0	9	16	9	11	0	1	0	0	p__Proteobacteria					0.217391
OTU_684	0	0	4	4	0	75	0	0	0	4	1	0	0	0	1	16	0	0	0	0	0	0	0	p__Proteobacteria					0.217391
OTU_685	0	0	0	0	0	0	0	0	0	12	0	0	0	0	0	0	0	0	0	18	62	2	11	p__Bacteroidetes					0.217391
OTU_686	34	3	26	0	0	14	0	0	0	0	0	0	0	0	0	0	0	0	0	0	0	0	28	p__Proteobacteria					0.217391
OTU_687	1	0	56	0	0	10	9	23	0	4	1	0	0	0	0	0	0	0	0	0	0	0	0	p__Proteobacteria					0.217391
OTU_688	0	0	0	0	0	22	0	0	0	9	0	0	0	0	0	0	0	0	0	19	37	0	14	p__Proteobacteria					0.217391
OTU_689	0	1	0	0	0	4	0	33	0	45	0	0	0	0	1	0	0	0	0	1	1	10	4	p__Actinobacteria					0.217391
OTU_690	0	0	0	0	0	0	0	0	0	2	0	0	0	0	0	1	1	0	0	16	38	7	34	p__Proteobacteria					0.217391
OTU_691	0	0	5	0	0	0	0	0	0	4	74	0	0	0	0	0	0	0	0	1	4	0	5	p__Proteobacteria					0.217391
OTU_692	21	10	21	0	10	26	1	0	0	0	1	0	0	0	0	0	0	0	0	0	0	0	0	p__Proteobacteria					0.217391
OTU_693	0	0	0	0	0	0	0	0	0	0	0	0	0	0	1	0	4	0	0	19	46	6	14	p__Proteobacteria					0.217391
OTU_694	21	10	13	0	7	35	0	1	1	1	0	0	0	0	0	0	0	0	0	0	0	0	0	p__Proteobacteria					0.217391
OTU_695	0	0	0	0	0	7	0	0	0	2	0	0	0	0	0	0	0	0	0	45	6	0	27	p__Bacteroidetes					0.217391
OTU_696	14	14	20	0	2	31	1	0	1	1	0	0	0	0	0	0	0	0	0	0	0	0	0	p__Proteobacteria					0.217391
OTU_697	0	0	0	0	0	0	0	0	0	7	0	0	0	0	0	0	0	0	0	24	35	6	12	p__Proteobacteria					0.217391
OTU_698	0	0	1	0	2	72	0	2	0	1	0	0	0	0	0	0	0	0	0	0	0	2	2	p__Actinobacteria					0.217391
OTU_699	19	7	14	0	2	31	0	1	1	0	0	0	0	0	1	0	0	0	0	0	0	0	0	p__Proteobacteria					0.217391
OTU_700	0	0	0	0	0	0	0	15	0	28	0	0	0	0	0	0	0	0	0	7	4	0	22	p__Proteobacteria					0.217391
OTU_701	0	0	0	0	0	3	0	1	0	0	0	0	0	0	0	0	0	0	0	7	23	13	26	p__Proteobacteria					0.217391
OTU_702	0	0	0	0	0	1	0	1	0	8	1	0	0	0	0	0	0	0	0	15	21	6	19	p__Proteobacteria					0.217391
OTU_703	0	0	16	6	1	4	0	2	0	40	0	0	0	0	0	0	0	1	0	0	0	0	0	p__Proteobacteria					0.217391
OTU_704	29	5	14	0	2	20	0	0	0	0	0	0	0	0	0	0	0	0	0	0	0	0	0	p__Proteobacteria					0.217391
OTU_705	10	5	14	1	3	34	0	1	0	1	0	0	0	0	0	0	0	0	0	0	0	0	0	p__Proteobacteria					0.217391
OTU_706	21	0	31	0	0	0	0	0	0	1	4	0	0	0	0	0	6	0	0	1	3	0	0	p__Proteobacteria					0.217391
OTU_707	0	0	0	0	0	18	3	7	0	33	1	0	0	0	0	0	0	0	0	0	0	0	4	p__Proteobacteria					0.217391
OTU_708	0	0	1	0	0	7	0	0	0	1	1	0	0	0	0	0	0	0	0	8	10	5	30	p__Proteobacteria					0.217391
OTU_709	0	0	0	0	0	0	0	0	0	6	0	0	0	0	0	0	0	0	0	32	11	5	9	p__Proteobacteria					0.217391
OTU_710	0	0	0	0	0	0	0	0	0	10	0	0	0	0	0	23	0	0	0	8	5	0	15	p__Proteobacteria					0.217391
OTU_711	12	8	14	0	3	22	1	0	0	0	0	0	0	0	0	0	0	0	0	0	0	0	0	p__Proteobacteria					0.217391
OTU_712	0	0	0	0	0	0	2	0	0	8	0	0	0	0	0	0	0	0	0	10	26	0	14	p__Proteobacteria					0.217391
OTU_713	0	0	2	0	1	1	0	3	0	38	0	0	0	0	0	0	0	0	0	0	2	0	10	p__Bacteroidetes					0.217391
OTU_714	18	5	8	0	5	17	0	1	1	1	0	0	0	0	0	0	0	0	0	0	0	0	0	p__Proteobacteria					0.217391
OTU_715	1	19	22	1	0	1	1	1	2	3	4	0	0	0	0	0	0	0	0	0	0	0	0	p__Proteobacteria					0.217391
OTU_716	0	0	0	0	0	0	0	0	0	0	0	4	1	0	18	1	0	14	0	0	5	0	11	p__Firmicutes					0.217391
OTU_717	20	9	5	0	2	16	0	0	0	1	0	0	0	0	0	0	0	0	0	0	0	0	0	p__Proteobacteria					0.217391
OTU_718	14	5	10	0	5	14	1	1	0	0	1	0	0	0	0	0	0	0	0	0	0	0	0	p__Proteobacteria					0.217391
OTU_719	17	3	8	0	3	19	0	1	0	0	0	0	0	0	0	0	0	0	0	0	0	0	0	p__Proteobacteria					0.217391
OTU_720	8	5	9	0	5	23	0	1	0	0	0	0	0	0	0	0	0	0	0	0	0	0	0	p__Proteobacteria					0.217391
OTU_721	13	0	10	0	2	21	0	2	0	1	0	0	0	0	0	0	0	0	0	0	0	0	1	p__Proteobacteria					0.217391
OTU_722	0	0	0	0	0	1	0	1	0	1	0	0	0	0	0	4	26	0	0	5	8	0	3	p__Proteobacteria					0.217391
OTU_723	0	0	5	0	0	0	1	0	0	4	0	0	0	0	0	0	0	0	0	9	6	1	23	p__Proteobacteria					0.217391
OTU_724	16	3	10	0	3	14	0	0	1	1	0	0	0	0	0	0	0	0	0	0	0	0	0	p__Proteobacteria					0.217391
OTU_725	12	9	9	0	2	14	0	0	0	1	0	0	0	0	0	0	0	1	0	0	0	0	0	p__Proteobacteria					0.217391
OTU_726	0	0	0	0	0	0	0	0	0	32	0	0	0	0	0	2	8	0	0	1	3	0	2	p__Proteobacteria					0.217391
OTU_727	0	0	3	3	0	22	6	11	0	0	1	0	0	0	1	0	0	0	0	0	0	0	0	p__Firmicutes					0.217391
OTU_728	0	0	3	0	0	26	0	5	0	0	10	0	0	0	0	0	0	0	0	2	1	0	0	p__Proteobacteria					0.217391
OTU_729	0	0	2	0	0	0	14	26	0	3	0	0	0	0	0	0	0	0	0	0	0	0	2	p__Proteobacteria					0.217391
OTU_730	0	4	0	0	0	18	0	0	0	0	0	0	9	0	8	0	0	0	0	6	1	0	0	p__Actinobacteria					0.217391
OTU_731	6	0	6	0	3	25	1	5	0	0	0	0	0	0	0	0	0	0	0	0	0	0	0	p__Proteobacteria					0.217391
OTU_732	11	3	10	0	7	15	0	0	0	0	0	0	0	0	0	0	0	0	0	0	0	0	0	p__Proteobacteria					0.217391
OTU_733	0	0	0	0	0	1	0	1	0	8	0	0	0	0	0	0	0	0	0	3	10	5	17	p__Proteobacteria					0.217391
OTU_734	10	2	13	0	5	13	0	1	0	1	0	0	0	0	0	0	0	0	0	0	0	0	0	p__Proteobacteria					0.217391
OTU_735	0	0	0	0	14	0	0	1	0	5	17	0	0	0	0	0	0	0	0	0	5	1	2	p__Proteobacteria					0.217391
OTU_736	4	0	5	0	0	4	0	0	0	0	0	0	1	0	0	0	0	0	0	3	1	0	26	p__Actinobacteria					0.217391
OTU_737	4	3	9	0	3	23	1	1	0	0	0	0	0	0	0	0	0	0	0	0	0	0	0	p__Proteobacteria					0.217391
OTU_738	0	0	1	0	0	13	0	0	0	14	0	0	0	0	0	0	0	0	0	0	2	10	4	p__Firmicutes					0.217391
OTU_739	0	0	1	1	0	1	10	17	2	6	0	0	0	1	0	0	0	0	0	0	1	1	2	p__Proteobacteria	c__Gammaproteobacteria	o__Enterobacteriales	f__Enterobacteriaceae		0.217391
OTU_740	0	0	4	0	0	0	1	24	0	8	0	0	0	0	0	0	0	0	0	3	1	2	0	p__Proteobacteria					0.217391
OTU_741	0	0	0	0	0	15	0	0	0	7	0	0	0	0	0	0	0	0	0	3	1	6	11	p__Proteobacteria					0.217391
OTU_742	17	1	6	0	0	5	0	0	0	3	0	0	0	0	0	0	0	0	1	0	0	0	8	p__Proteobacteria					0.217391
OTU_743	5	2	11	0	2	20	0	0	1	0	0	0	0	0	0	0	0	0	0	0	0	0	0	p__Proteobacteria					0.217391
OTU_744	6	4	8	0	1	17	0	1	0	3	0	0	0	0	0	0	0	0	0	0	0	0	0	p__Proteobacteria					0.217391
OTU_745	14	3	10	0	3	9	0	0	0	1	0	0	0	0	0	0	0	0	0	0	0	0	0	p__Proteobacteria					0.217391
OTU_746	0	0	0	0	0	0	0	6	0	3	0	0	0	0	0	0	0	0	0	2	17	1	11						0.217391
OTU_747	9	4	12	0	3	12	0	0	0	0	0	0	0	0	0	0	0	0	0	0	0	0	0	p__Proteobacteria					0.217391
OTU_748	1	0	0	0	0	0	0	0	0	1	0	0	1	0	0	0	0	2	0	10	10	5	9	p__Proteobacteria					0.217391
OTU_749	6	2	11	0	4	14	1	0	0	1	0	0	0	0	0	0	0	0	0	0	0	0	0	p__Proteobacteria					0.217391
OTU_750	2	0	12	12	0	0	0	1	9	0	0	1	0	0	0	0	0	0	0	0	2	0	0	p__Proteobacteria					0.217391
OTU_751	6	16	12	0	0	0	0	2	1	0	2	0	0	0	0	0	0	0	0	0	0	0	0	p__Proteobacteria					0.217391
OTU_752	0	0	0	0	0	0	0	0	0	4	0	0	0	0	0	0	0	0	0	7	21	4	3	p__Proteobacteria					0.217391
OTU_753	5	3	17	0	3	8	0	1	0	1	0	0	0	0	0	0	0	0	0	0	0	0	0	p__Proteobacteria					0.217391
OTU_754	3	0	0	0	0	1	0	0	0	4	0	0	0	0	0	0	0	0	0	10	5	0	15	p__Proteobacteria					0.217391
OTU_755	8	2	5	0	5	15	0	1	0	1	0	0	0	0	0	0	0	0	0	0	0	0	0	p__Proteobacteria					0.217391
OTU_756	2	23	6	0	0	0	0	2	3	0	0	0	0	0	0	0	0	0	0	0	0	0	1	p__Proteobacteria					0.217391
OTU_757	0	0	9	0	0	0	12	10	0	3	0	0	0	0	0	0	0	0	0	0	0	0	3	p__Firmicutes					0.217391
OTU_758	0	0	0	0	0	3	0	0	0	0	0	0	0	0	0	0	5	0	0	5	7	0	17	p__Proteobacteria					0.217391
OTU_759	0	0	0	0	0	1	1	6	6	1	11	0	0	0	0	0	0	0	0	1	2	1	6	p__Proteobacteria					0.217391
OTU_760	9	4	12	0	3	7	0	1	0	0	0	0	0	0	0	0	0	0	0	0	0	0	0	p__Proteobacteria					0.217391
OTU_761	6	2	10	0	5	11	0	1	0	0	0	0	0	0	0	0	0	0	0	0	0	0	0	p__Proteobacteria					0.217391
OTU_762	0	0	0	0	0	0	0	0	0	7	0	0	0	0	0	2	13	0	0	7	0	0	6	p__Proteobacteria					0.217391
OTU_763	2	0	3	0	0	2	0	0	0	0	0	0	10	0	0	0	0	0	0	0	0	0	18	p__Actinobacteria					0.217391
OTU_764	0	1	1	1	0	0	0	0	0	2	2	0	0	11	0	0	0	14	2	0	0	0	0	p__Proteobacteria					0.217391
OTU_765	0	0	1	0	0	1	0	0	0	6	0	0	0	0	0	0	0	0	0	3	9	3	11	p__Proteobacteria					0.217391
OTU_766	8	2	5	0	3	15	1	0	0	0	0	0	0	0	0	0	0	0	0	0	0	0	0	p__Proteobacteria					0.217391
OTU_767	0	0	0	0	0	0	0	0	0	20	0	0	0	0	0	4	4	0	4	0	0	2	0	p__Bacteroidetes					0.217391
OTU_768	0	0	0	0	0	0	5	13	1	8	2	0	0	0	0	0	0	0	0	0	3	0	1	p__Proteobacteria					0.217391
OTU_769	8	5	5	0	3	11	0	0	1	0	0	0	0	0	0	0	0	0	0	0	0	0	0	p__Proteobacteria					0.217391
OTU_770	4	5	6	0	1	14	0	3	0	0	0	0	0	0	0	0	0	0	0	0	0	0	0	p__Proteobacteria					0.217391
OTU_771	1	0	1	0	0	4	0	1	0	2	0	0	0	0	14	4	5	0	0	0	0	0	0	p__Proteobacteria					0.217391
OTU_772	0	0	0	0	0	2	0	0	0	8	0	0	1	0	0	0	5	9	6	1	0	0	0	p__Proteobacteria					0.217391
OTU_773	1	0	0	0	0	0	0	0	0	0	4	0	0	0	0	0	0	1	0	7	14	3	2	p__Proteobacteria					0.217391
OTU_774	0	0	0	0	10	0	0	0	0	4	0	0	0	0	0	0	2	0	0	0	1	4	11	p__Proteobacteria					0.217391
OTU_775	0	0	0	0	0	0	0	0	0	0	0	0	0	0	0	0	2	0	0	4	7	4	15	p__Proteobacteria					0.217391
OTU_776	0	0	2	0	0	0	0	0	0	0	0	0	0	0	0	0	0	0	0	3	2	7	18	p__Proteobacteria					0.217391
OTU_777	0	0	0	0	0	0	0	3	0	0	0	0	0	0	0	0	0	0	0	3	12	5	9	p__Bacteroidetes					0.217391
OTU_778	8	4	4	0	2	14	0	0	0	0	0	0	0	0	0	0	0	0	0	0	0	0	0	p__Proteobacteria					0.217391
OTU_779	0	0	2	0	0	0	0	0	0	0	0	0	0	0	0	0	0	0	0	5	9	12	4	p__Proteobacteria					0.217391
OTU_780	8	1	6	0	2	12	0	2	0	0	0	0	0	0	0	0	0	0	0	0	0	0	0	p__Proteobacteria					0.217391
OTU_781	0	0	2	0	0	5	4	8	0	12	0	0	0	0	0	0	0	0	0	0	0	0	0	p__Proteobacteria					0.217391
OTU_782	3	6	5	0	4	9	0	0	1	1	0	0	0	1	0	0	0	0	0	0	0	0	0	p__Proteobacteria					0.217391
OTU_783	0	0	0	1	0	0	0	0	0	1	0	0	0	0	0	0	2	0	0	10	7	2	7	p__Proteobacteria					0.217391
OTU_784	5	4	5	0	3	11	1	0	1	0	0	0	0	0	0	0	0	0	0	0	0	0	0	p__Proteobacteria					0.217391
OTU_785	0	0	0	0	0	0	0	0	0	8	0	0	0	0	0	0	3	3	0	3	11	1	1	p__Proteobacteria					0.217391
OTU_786	6	3	5	0	4	11	1	0	0	0	0	0	0	0	0	0	0	0	0	0	0	0	0	p__Proteobacteria					0.217391
OTU_787	5	0	9	2	0	0	1	5	5	0	0	1	1	0	0	0	0	0	0	0	0	0	0	p__Proteobacteria					0.217391
OTU_788	1	0	6	0	0	1	0	1	0	3	0	0	0	0	0	0	0	0	0	2	11	0	4	p__Proteobacteria					0.217391
OTU_789	0	0	0	0	0	0	0	0	0	5	0	0	0	0	0	0	0	0	0	10	7	3	4	p__Proteobacteria					0.217391
OTU_790	2	0	1	0	0	4	0	0	0	1	0	0	7	0	0	0	0	0	0	7	0	1	5	p__Actinobacteria					0.217391
OTU_791	0	0	0	0	0	3	0	0	0	0	0	0	0	0	0	0	0	1	0	13	2	3	6	p__Bacteroidetes					0.217391
OTU_792	9	0	12	0	0	1	0	0	0	2	0	0	0	0	0	0	0	0	0	2	0	2	0	p__Proteobacteria					0.217391
OTU_793	0	0	0	0	0	0	0	0	0	1	0	0	0	0	0	0	6	5	0	3	3	0	10	p__Bacteroidetes					0.217391
OTU_794	5	4	10	0	4	5	0	0	0	0	0	0	0	0	0	0	0	0	0	0	0	0	0	p__Proteobacteria					0.217391
OTU_795	0	0	0	0	0	0	0	0	0	0	18	0	0	0	0	0	0	0	0	2	4	2	2	p__Proteobacteria					0.217391
OTU_796	10	2	5	0	2	9	0	0	0	0	0	0	0	0	0	0	0	0	0	0	0	0	0	p__Proteobacteria					0.217391
OTU_797	0	0	4	0	1	1	1	3	0	8	3	0	0	0	0	0	0	0	0	1	4	1	0	p__Proteobacteria					0.217391
OTU_798	0	0	0	0	0	0	0	1	1	7	2	0	0	0	0	0	0	0	0	5	6	1	4	p__Proteobacteria					0.217391
OTU_799	0	0	6	0	0	0	1	0	0	1	0	0	0	0	0	0	0	0	0	5	7	2	5	p__Proteobacteria					0.217391
OTU_800	4	2	13	0	2	5	0	1	0	0	0	0	0	0	0	0	0	0	0	0	0	0	0	p__Proteobacteria					0.217391
OTU_801	0	0	2	0	0	0	2	13	5	0	5	0	0	0	0	0	0	0	0	0	0	0	0	p__Proteobacteria					0.217391
OTU_802	8	2	5	0	4	8	0	0	0	0	0	0	0	0	0	0	0	0	0	0	0	0	0	p__Proteobacteria					0.217391
OTU_803	8	3	5	0	3	8	0	0	0	0	0	0	0	0	0	0	0	0	0	0	0	0	0	p__Proteobacteria					0.217391
OTU_804	0	0	2	2	0	1	6	10	0	1	0	0	0	0	0	0	0	0	0	0	1	1	2	p__Proteobacteria					0.217391
OTU_805	0	0	12	0	0	1	2	2	0	5	0	0	0	0	0	0	0	0	0	2	0	1	1	p__Proteobacteria					0.217391
OTU_806	0	0	4	0	6	7	0	0	0	0	1	1	0	0	3	0	0	0	0	0	0	0	4	p__Actinobacteria					0.217391
OTU_807	0	0	0	0	0	0	0	1	0	0	6	0	0	0	0	0	0	1	0	3	4	4	7	p__Proteobacteria					0.217391
OTU_808	0	0	0	0	0	0	0	0	0	2	0	0	0	0	0	0	0	0	0	11	7	3	3	p__Proteobacteria					0.217391
OTU_809	9	2	3	0	2	10	0	0	0	0	0	0	0	0	0	0	0	0	0	0	0	0	0	p__Proteobacteria					0.217391
OTU_810	7	2	6	0	3	6	1	0	0	0	0	0	0	0	0	0	0	0	0	0	0	0	0	p__Proteobacteria					0.217391
OTU_811	4	6	2	0	2	10	1	0	0	0	0	0	0	0	0	0	0	0	0	0	0	0	0	p__Proteobacteria					0.217391
OTU_812	0	0	0	0	0	0	0	0	0	0	0	0	0	0	0	5	12	0	0	0	2	2	4	p__Proteobacteria					0.217391
OTU_813	6	3	2	0	4	10	0	0	0	0	0	0	0	0	0	0	0	0	0	0	0	0	0	p__Proteobacteria					0.217391
OTU_814	0	0	2	1	0	1	1	0	0	8	0	0	0	0	0	0	0	0	0	4	3	1	3	p__Proteobacteria					0.217391
OTU_815	9	2	3	0	2	8	0	0	0	0	0	0	0	0	0	0	0	0	0	0	0	0	0	p__Proteobacteria					0.217391
OTU_816	4	3	5	0	2	10	0	0	0	0	0	0	0	0	0	0	0	0	0	0	0	0	0	p__Proteobacteria					0.217391
OTU_817	2	1	6	0	0	7	0	0	1	1	2	0	0	0	0	0	0	0	0	0	0	0	3	p__Proteobacteria					0.217391
OTU_818	3	3	7	0	1	6	0	0	0	2	0	0	0	0	0	0	0	0	1	0	0	0	0	p__Proteobacteria					0.217391
OTU_819	5	2	3	1	3	8	0	0	0	0	1	0	0	0	0	0	0	0	0	0	0	0	0	p__Proteobacteria					0.217391
OTU_820	0	0	5	0	0	2	0	1	0	4	0	0	0	0	0	0	0	0	0	0	6	0	5	p__Actinobacteria					0.217391
OTU_821	7	2	4	0	2	7	1	0	0	0	0	0	0	0	0	0	0	0	0	0	0	0	0	p__Proteobacteria					0.217391
OTU_822	0	0	3	1	0	0	5	8	0	4	0	0	0	0	0	0	0	0	0	0	0	0	2	p__Firmicutes					0.217391
OTU_823	0	0	0	0	0	0	2	6	0	4	0	0	0	0	0	0	0	0	0	0	0	5	6	p__Proteobacteria					0.217391
OTU_824	0	0	0	0	0	2	0	0	0	2	0	0	0	10	0	1	2	3	1	1	0	0	0	p__Proteobacteria					0.217391
OTU_825	6	3	5	0	2	4	0	1	1	0	0	0	0	0	0	0	0	0	0	0	0	0	0	p__Proteobacteria					0.217391
OTU_826	1	2	9	0	2	6	0	0	0	0	2	0	0	0	0	0	0	0	0	0	0	0	0	p__Proteobacteria					0.217391
OTU_827	0	0	0	0	0	0	0	0	0	0	0	0	0	0	0	3	0	0	0	9	4	4	2	p__Proteobacteria					0.217391
OTU_828	0	0	0	0	0	2	0	0	0	0	0	0	0	0	0	0	0	0	0	3	2	10	4	p__Proteobacteria					0.217391
OTU_829	0	0	0	0	0	1	0	0	0	1	0	0	0	0	0	2	1	3	0	3	6	1	2	p__Proteobacteria					0.217391
OTU_830	0	0	0	0	0	0	0	0	0	5	0	0	0	0	0	1	3	0	4	1	3	1	2	p__Proteobacteria					0.217391
OTU_831	0	0	0	0	7	2	1	0	1	3	0	0	0	0	0	0	0	4	0	0	0	0	2	p__Proteobacteria					0.217391
OTU_832	5	5	2	0	2	5	0	1	0	0	0	0	0	0	0	0	0	0	0	0	0	0	0	p__Proteobacteria					0.217391
OTU_833	0	0	4	0	0	0	0	0	0	0	6	0	0	0	0	0	0	0	0	5	2	0	3	p__Proteobacteria					0.217391
OTU_834	0	0	1	0	1	4652	0	1	0	5	1	0	0	0	0	0	0	0	0	0	0	16	13	p__Bacteroidetes					0.173913
OTU_835	0	0	7	0	1	2222	0	5	0	28	0	0	0	0	0	0	0	0	0	0	0	0	0	p__Bacteroidetes					0.173913
OTU_836	0	2	0	0	1	0	0	0	0	1488	0	0	0	0	0	0	0	0	0	19	0	0	6	p__Proteobacteria					0.173913
OTU_837	0	0	0	0	0	1364	0	0	0	106	1	0	0	0	0	23	17	1	0	0	0	0	0	p__Proteobacteria					0.173913
OTU_838	0	0	0	0	0	1320	1	10	0	12	0	0	0	0	0	0	0	0	0	0	18	0	0	p__Firmicutes					0.173913
OTU_839	0	0	0	0	0	0	0	0	0	0	0	1	1	1264	1	1	0	3	2	0	0	45	0	p__Firmicutes					0.173913
OTU_840	0	0	0	0	0	0	0	4	0	403	0	0	0	0	1	352	432	0	0	0	0	0	0	p__Bacteroidetes					0.173913
OTU_841	0	0	0	2	3	0	0	1	0	1139	0	0	0	0	0	0	0	0	0	0	0	0	4	p__Bacteroidetes					0.173913
OTU_842	0	0	0	0	0	0	0	0	0	7	0	0	0	0	0	406	542	1	0	0	1	0	25	p__Proteobacteria					0.173913
OTU_843	0	0	0	0	1	0	0	1	0	38	0	0	0	0	0	0	0	870	0	52	6	0	0	p__Bacteroidetes					0.173913
OTU_844	0	0	0	930	0	1	0	1	1	3	1	0	0	2	0	0	0	0	0	0	0	1	3	p__Proteobacteria					0.173913
OTU_845	0	0	0	0	0	0	0	0	0	1	0	0	0	0	0	0	0	1	0	44	50	762	57	p__Proteobacteria					0.173913
OTU_846	0	0	6	0	0	0	0	0	0	0	0	0	0	0	491	295	0	0	1	5	0	0	0	p__Bacteroidetes					0.173913
OTU_847	0	0	0	0	0	0	0	0	0	0	0	0	1	1	703	0	0	0	0	0	8	3	2	p__Proteobacteria					0.173913
OTU_848	0	0	0	0	0	0	0	0	0	0	0	0	0	0	0	0	0	0	0	90	67	437	68	p__Proteobacteria					0.173913
OTU_849	0	0	0	0	0	0	0	0	0	0	0	0	0	0	0	0	0	0	0	37	23	520	49	p__Proteobacteria					0.173913
OTU_850	0	0	0	0	0	0	0	0	0	0	0	0	0	0	0	0	0	0	0	44	29	504	32	p__Proteobacteria					0.173913
OTU_851	0	0	1	0	0	0	1	0	0	6	0	0	1	0	1	0	1	238	347	0	1	0	8	p__Bacteroidetes					0.173913
OTU_852	0	0	0	0	0	0	0	0	0	1	0	0	0	0	0	0	0	0	0	40	57	421	83	p__Proteobacteria					0.173913
OTU_853	0	0	0	0	0	0	0	0	0	462	0	0	0	0	0	0	0	0	0	24	87	1	10	p__Proteobacteria					0.173913
OTU_854	60	0	0	0	0	1	0	1	128	2	388	0	0	0	0	0	0	0	0	0	0	0	0	p__Proteobacteria					0.173913
OTU_855	0	0	0	0	0	0	0	0	0	0	0	0	0	0	0	95	44	307	125	0	0	0	0	p__Proteobacteria					0.173913
OTU_856	0	0	0	0	0	0	0	0	0	4	0	0	0	0	0	151	392	0	0	0	0	0	17	p__Bacteroidetes					0.173913
OTU_857	0	0	13	0	0	0	73	187	0	286	0	0	0	0	0	0	0	0	0	0	0	0	0	p__Proteobacteria					0.173913
OTU_858	0	0	0	0	2	1	0	0	0	525	0	0	0	0	0	0	0	0	0	6	14	0	0	p__Proteobacteria					0.173913
OTU_859	0	0	0	0	0	0	0	0	0	0	0	0	0	0	0	0	0	0	0	214	175	94	42	p__Proteobacteria					0.173913
OTU_860	0	0	1	0	0	2	0	0	2	511	0	1	0	0	0	0	0	1	0	5	0	0	0	p__Proteobacteria					0.173913
OTU_861	0	0	3	0	1	281	0	0	2	1	0	0	0	0	0	0	0	214	0	0	0	0	0	p__Bacteroidetes					0.173913
OTU_862	0	0	0	0	0	0	0	0	0	0	0	0	0	0	0	0	0	0	0	47	21	391	29	p__Proteobacteria					0.173913
OTU_863	0	0	0	0	0	0	0	0	0	0	0	0	0	0	0	0	0	0	0	13	10	388	21	p__Proteobacteria					0.173913
OTU_864	0	0	0	0	0	0	0	0	0	0	0	0	0	0	0	0	0	0	0	208	91	57	69	p__Bacteroidetes					0.173913
OTU_865	1	0	11	1	0	2	0	2	0	407	0	0	0	0	0	0	0	0	0	0	0	0	0	p__Proteobacteria					0.173913
OTU_866	0	0	2	0	3	58	0	0	0	337	0	0	0	0	0	0	0	0	0	0	0	0	0	p__Firmicutes					0.173913
OTU_867	1	0	2	0	0	0	1	1	367	0	0	0	0	0	0	5	4	0	0	0	0	0	0	p__Proteobacteria					0.173913
OTU_868	0	0	0	0	0	0	0	0	0	0	0	0	0	0	0	0	0	0	0	44	36	237	46	p__Proteobacteria					0.173913
OTU_869	0	0	0	0	0	0	0	0	0	0	0	0	0	1	0	236	78	31	14	1	0	0	0	p__Proteobacteria					0.173913
OTU_870	0	0	0	0	0	29	8	274	0	47	0	0	0	0	0	0	0	0	0	0	0	0	1	p__Proteobacteria					0.173913
OTU_871	0	0	1	0	0	4	1	0	0	6	0	0	0	0	0	245	98	0	0	0	0	0	0	p__Bacteroidetes					0.173913
OTU_872	0	0	75	0	0	0	71	190	0	10	0	0	0	0	0	0	0	0	0	0	0	0	0	p__Proteobacteria					0.173913
OTU_873	0	0	0	0	0	10	0	0	0	261	0	0	0	0	0	0	0	0	0	33	30	0	0	p__Firmicutes					0.173913
OTU_874	1	0	310	3	5	5	1	0	0	0	0	0	0	0	0	0	0	0	0	0	0	0	0	p__Proteobacteria					0.173913
OTU_875	0	0	264	33	5	6	1	1	0	0	1	0	0	0	0	0	0	0	0	1	0	0	0	p__Proteobacteria					0.173913
OTU_876	0	0	0	0	0	0	0	0	0	4	0	0	0	0	0	0	0	0	292	2	7	0	0	p__Bacteroidetes					0.173913
OTU_877	0	0	0	0	1	7	0	0	0	21	0	0	1	0	0	0	0	264	0	0	0	0	7	p__Verrucomicrobia					0.173913
OTU_878	1	0	1	0	1	259	0	1	3	3	1	0	0	0	0	0	0	29	0	0	0	0	0	p__Proteobacteria					0.173913
OTU_879	0	0	0	1	0	207	0	0	0	38	0	0	0	0	0	0	0	0	0	41	7	1	0	p__Proteobacteria					0.173913
OTU_880	0	0	0	0	0	0	0	0	0	0	0	0	0	0	0	0	0	0	0	19	7	247	17	p__Proteobacteria					0.173913
OTU_881	0	0	0	0	0	0	0	0	0	0	0	1	2	237	1	0	36	1	0	5	1	0	0	p__Firmicutes					0.173913
OTU_882	0	0	0	0	0	0	0	0	0	0	0	0	0	0	0	0	0	0	0	31	37	165	49	p__Proteobacteria					0.173913
OTU_883	0	0	9	9	0	7	1	1	0	231	1	0	0	0	0	0	0	1	0	1	1	0	0	p__Proteobacteria					0.173913
OTU_884	0	0	0	0	0	0	0	0	0	0	240	0	0	0	0	0	0	0	0	8	8	1	4	p__Proteobacteria					0.173913
OTU_885	0	0	0	0	0	0	0	0	0	0	0	0	0	0	0	0	0	0	0	27	16	177	35	p__Proteobacteria					0.173913
OTU_886	0	0	0	0	0	0	0	0	0	139	0	0	0	0	0	0	0	0	0	32	59	18	0	p__Bacteroidetes					0.173913
OTU_887	0	0	175	0	0	1	14	54	0	3	0	0	0	0	0	0	0	0	0	0	0	0	0	p__Proteobacteria					0.173913
OTU_888	0	0	6	0	0	0	0	0	0	72	0	0	0	1	0	0	0	0	0	0	161	0	4	p__Bacteroidetes					0.173913
OTU_889	0	0	1	0	1	0	1	8	80	12	138	0	0	0	0	0	0	0	0	0	1	0	0	p__Proteobacteria					0.173913
OTU_890	0	0	0	0	0	0	0	0	0	0	0	1	0	0	104	0	0	0	0	3	74	55	1	p__Actinobacteria					0.173913
OTU_891	0	0	0	0	0	0	0	0	0	0	0	102	0	0	112	0	0	0	0	3	0	16	0	p__Proteobacteria					0.173913
OTU_892	0	0	0	0	0	0	0	0	0	123	0	0	0	0	0	22	77	1	0	3	0	0	0	p__Proteobacteria					0.173913
OTU_893	0	0	0	0	0	0	0	0	0	1	0	0	0	0	0	0	0	0	0	101	63	27	29	p__Bacteroidetes					0.173913
OTU_894	0	0	7	0	0	0	1	11	0	4	194	0	0	0	0	0	0	0	0	0	0	1	0	p__Proteobacteria					0.173913
OTU_895	0	0	14	0	1	38	0	16	0	142	0	0	0	0	0	0	0	0	0	0	0	0	0	p__Proteobacteria					0.173913
OTU_896	0	0	0	0	0	0	0	0	0	0	0	0	0	0	0	0	0	0	0	9	15	163	23	p__Proteobacteria					0.173913
OTU_897	0	0	0	0	0	0	0	0	0	1	0	0	0	0	0	0	0	0	0	38	109	10	48	p__Proteobacteria					0.173913
OTU_898	0	1	0	0	0	0	0	0	0	0	0	0	0	0	0	0	0	0	0	38	125	17	22	p__Proteobacteria					0.173913
OTU_899	0	0	0	0	0	0	0	0	0	0	0	0	0	0	0	0	0	0	0	16	13	138	30	p__Proteobacteria					0.173913
OTU_900	0	0	0	0	0	0	0	0	0	9	0	0	0	0	0	57	27	0	102	0	0	0	0	p__Proteobacteria					0.173913
OTU_901	0	0	0	1	0	1	34	152	2	2	0	0	0	0	0	0	0	0	0	0	0	0	0	p__Proteobacteria					0.173913
OTU_902	0	0	1	0	0	167	0	0	0	6	0	0	0	0	0	12	5	0	0	0	0	0	0	p__Bacteroidetes					0.173913
OTU_903	0	0	0	0	0	91	0	0	0	32	0	0	0	0	0	0	0	0	0	44	18	0	0	p__Proteobacteria					0.173913
OTU_904	3	0	170	0	4	3	0	1	0	0	0	0	0	0	0	0	0	0	0	0	0	0	0	p__Proteobacteria					0.173913
OTU_905	0	0	0	0	0	0	0	0	0	0	0	0	0	0	0	0	0	0	0	9	4	159	3	p__Proteobacteria					0.173913
OTU_906	4	0	11	0	0	0	0	1	41	0	115	0	0	0	0	0	0	0	0	0	0	0	0	p__Proteobacteria					0.173913
OTU_907	0	0	4	0	0	0	0	1	0	0	0	0	0	0	0	143	15	7	0	0	0	0	0	p__Bacteroidetes					0.173913
OTU_908	0	1	1	1	35	116	1	3	0	0	1	0	0	1	5	0	0	1	1	0	0	0	0	p__Proteobacteria	c__Alphaproteobacteria	o__Rhodospirillales	f__Acetobacteraceae		0.173913
OTU_909	0	1	1	0	1	45	0	1	0	85	1	0	0	0	0	0	0	0	0	9	23	0	0	p__Proteobacteria					0.173913
OTU_910	0	0	11	0	0	27	0	1	1	0	0	0	0	0	0	0	0	104	0	18	0	0	0	p__Firmicutes					0.173913
OTU_911	0	0	2	0	0	0	0	2	8	0	148	0	0	0	0	0	0	0	0	0	0	1	0	p__Proteobacteria					0.173913
OTU_912	0	0	25	0	1	1	2	7	0	0	0	0	0	0	0	0	0	0	0	0	0	0	121	p__Proteobacteria					0.173913
OTU_913	0	0	0	0	0	0	0	0	0	0	0	1	0	0	0	0	0	0	0	3	3	138	9	p__Proteobacteria					0.173913
OTU_914	0	0	2	1	0	144	0	4	0	2	0	0	0	0	0	0	0	0	0	0	0	0	0	p__Firmicutes					0.173913
OTU_915	0	0	0	0	0	103	0	0	0	1	0	0	0	0	0	0	0	0	0	9	20	0	20	p__Bacteroidetes					0.173913
OTU_916	0	0	0	0	0	1	0	0	0	1	0	0	0	0	0	5	0	0	0	40	0	2	100	p__Actinobacteria					0.173913
OTU_917	0	0	2	0	0	0	0	1	0	0	0	0	0	0	0	120	13	13	0	0	0	0	0	p__Bacteroidetes					0.173913
OTU_918	0	0	10	2	1	0	109	23	0	0	0	0	1	0	0	0	0	0	0	0	1	0	0	p__Proteobacteria					0.173913
OTU_919	3	0	0	0	0	2	0	0	23	0	110	0	0	0	0	1	0	0	0	1	1	0	1	p__Proteobacteria					0.173913
OTU_920	0	0	0	0	0	0	0	0	0	1	0	0	0	0	0	0	0	0	0	75	28	17	21	p__Bacteroidetes					0.173913
OTU_921	0	0	0	0	0	0	0	0	0	0	0	0	0	0	0	0	0	0	0	2	8	121	7	p__Proteobacteria					0.173913
OTU_922	0	0	0	0	0	0	0	0	0	0	0	0	0	0	0	0	0	0	0	20	3	104	9	p__Proteobacteria					0.173913
OTU_923	10	0	2	0	9	110	1	1	0	1	1	0	0	0	0	0	0	0	0	0	0	0	0	p__Proteobacteria					0.173913
OTU_924	0	0	0	0	0	0	0	0	0	0	0	0	0	0	0	0	0	0	0	14	12	103	3	p__Proteobacteria					0.173913
OTU_925	0	0	1	0	0	0	0	0	0	0	0	0	0	111	1	0	0	0	1	8	5	1	3	p__Bacteroidetes					0.173913
OTU_926	0	0	0	0	0	0	0	0	0	71	0	0	0	0	0	0	0	0	0	12	22	0	25	p__Proteobacteria					0.173913
OTU_927	0	0	81	0	1	0	7	21	0	0	0	0	0	0	0	0	0	0	0	0	0	0	19	p__Proteobacteria					0.173913
OTU_928	0	0	0	0	0	0	0	0	0	1	0	0	0	0	0	0	0	0	0	42	54	4	25	p__Proteobacteria					0.173913
OTU_929	0	0	0	0	0	62	0	2	0	7	0	0	0	52	1	0	0	0	0	0	1	0	0	p__Actinobacteria					0.173913
OTU_930	0	0	0	0	0	0	0	0	0	32	0	0	0	0	0	26	19	0	47	0	0	1	0						0.173913
OTU_931	0	0	0	0	0	0	0	0	0	0	0	0	0	0	0	0	0	0	0	25	70	11	19	p__Proteobacteria					0.173913
OTU_932	0	0	0	0	0	0	0	0	0	0	0	0	0	0	0	0	0	0	0	22	9	79	14	p__Proteobacteria					0.173913
OTU_933	58	2	42	0	1	19	0	0	0	0	1	0	0	0	0	0	0	0	0	0	0	0	0	p__Proteobacteria					0.173913
OTU_934	0	0	0	0	0	0	0	0	0	4	0	0	0	0	0	0	0	0	0	48	28	0	42	p__Bacteroidetes					0.173913
OTU_935	0	0	0	0	0	0	0	0	0	0	0	0	0	0	0	0	0	0	0	18	7	84	11	p__Proteobacteria					0.173913
OTU_936	0	0	0	0	0	0	0	0	0	0	0	0	0	0	0	0	0	0	0	2	4	14	93	p__Proteobacteria					0.173913
OTU_937	6	1	39	0	0	17	1	1	1	45	0	0	0	0	0	0	0	0	0	0	0	0	0	p__Proteobacteria					0.173913
OTU_938	61	3	32	0	1	8	0	1	0	1	0	0	0	0	0	0	0	0	0	0	0	0	0	p__Proteobacteria					0.173913
OTU_939	1	0	97	0	0	0	0	0	0	1	4	0	0	0	0	0	0	0	0	0	2	0	2	p__Proteobacteria					0.173913
OTU_940	1	0	28	0	0	0	2	7	0	1	0	0	0	0	0	0	0	0	0	0	0	0	67	p__Actinobacteria					0.173913
OTU_941	0	0	38	1	0	0	19	41	1	2	1	0	0	0	0	0	0	0	0	1	0	0	0	p__Proteobacteria					0.173913
OTU_942	0	0	0	0	0	1	0	0	0	0	0	0	0	0	0	0	0	0	0	23	45	7	28	p__Proteobacteria					0.173913
OTU_943	23	0	62	0	0	6	1	1	1	1	6	0	0	0	1	0	1	0	0	0	0	0	0	p__Proteobacteria					0.173913
OTU_944	0	0	0	0	0	10	0	1	0	4	0	0	0	0	0	0	63	0	0	22	0	0	0	p__Proteobacteria					0.173913
OTU_945	40	1	28	0	4	23	0	0	1	1	0	0	0	0	0	0	0	0	0	0	0	0	0	p__Proteobacteria					0.173913
OTU_946	51	3	34	0	0	8	0	0	0	0	0	0	0	0	0	0	0	0	0	0	0	0	0	p__Proteobacteria					0.173913
OTU_947	0	0	0	0	0	21	0	0	0	46	0	0	0	0	0	0	22	0	0	0	0	5	0	p__Proteobacteria					0.173913
OTU_948	24	3	45	0	1	15	0	0	1	1	0	0	0	0	0	1	1	0	0	0	0	0	0	p__Proteobacteria					0.173913
OTU_949	0	1	0	12	0	0	1	5	47	0	26	0	0	0	0	0	0	0	0	0	0	0	0	p__Proteobacteria					0.173913
OTU_950	0	0	5	0	0	3	0	2	0	81	0	0	0	0	0	0	0	1	0	0	0	0	0	p__Proteobacteria					0.173913
OTU_951	0	0	62	0	0	10	0	8	0	11	0	0	0	0	0	1	0	0	0	0	0	0	0	p__Proteobacteria					0.173913
OTU_952	0	0	0	3	0	0	0	0	0	2	84	0	0	0	0	0	0	0	0	0	3	0	0	p__Proteobacteria					0.173913
OTU_953	4	2	75	0	4	1	0	1	0	0	1	0	0	0	0	0	0	0	0	0	0	0	0	p__Proteobacteria					0.173913
OTU_954	0	0	4	0	70	8	1	0	0	0	0	0	0	0	0	0	0	0	0	0	0	0	5	p__Proteobacteria					0.173913
OTU_955	0	4	0	0	0	16	0	0	0	0	0	0	0	0	0	0	0	0	54	14	0	0	0	p__Proteobacteria					0.173913
OTU_956	0	0	0	0	0	63	0	0	0	0	0	0	0	0	0	0	0	0	0	2	0	18	5	p__Firmicutes					0.173913
OTU_957	0	0	2	0	0	0	0	0	0	62	0	0	0	0	0	0	0	0	0	17	7	0	0	p__Proteobacteria					0.173913
OTU_958	0	0	19	0	0	2	0	11	0	1	54	0	0	0	0	0	0	0	0	0	0	0	0	p__Proteobacteria					0.173913
OTU_959	0	0	0	0	0	0	0	0	0	0	0	0	0	0	0	0	0	0	0	8	12	50	15	p__Proteobacteria					0.173913
OTU_960	2	0	19	0	60	2	0	0	0	1	0	0	0	0	0	0	0	0	0	0	0	0	0	p__Proteobacteria					0.173913
OTU_961	0	0	0	0	0	0	0	0	0	0	0	0	0	0	0	0	0	0	0	2	37	13	32	p__Bacteroidetes					0.173913
OTU_962	0	0	0	0	0	60	0	0	0	4	0	0	0	0	0	2	0	0	0	0	0	17	0	p__Bacteroidetes					0.173913
OTU_963	0	0	0	0	0	0	0	0	0	0	0	0	0	0	0	0	1	1	0	30	27	10	12	p__Proteobacteria					0.173913
OTU_964	0	0	0	0	0	0	0	0	0	64	0	0	0	0	0	0	0	0	0	2	5	1	9	p__Proteobacteria					0.173913
OTU_965	0	0	0	0	0	0	0	0	0	0	0	0	0	0	0	0	1	0	0	15	23	18	22	p__Proteobacteria					0.173913
OTU_966	0	0	1	0	0	0	0	0	0	0	0	0	0	0	0	0	0	0	0	21	43	2	11	p__Bacteroidetes					0.173913
OTU_967	0	0	55	0	1	3	0	3	0	15	0	0	0	0	0	0	0	0	0	0	0	0	0	p__Proteobacteria					0.173913
OTU_968	0	0	0	0	0	30	0	0	0	17	0	0	0	0	0	0	0	0	0	0	5	0	22	p__Proteobacteria					0.173913
OTU_969	0	0	4	0	0	0	34	34	0	2	0	0	0	0	0	0	0	0	0	0	0	0	0	p__Proteobacteria					0.173913
OTU_970	0	0	1	0	0	3	0	0	10	1	54	0	0	0	0	0	3	0	0	0	1	0	0	p__Proteobacteria					0.173913
OTU_971	0	0	0	0	0	0	0	0	0	0	0	1	0	0	0	0	0	0	0	2	4	64	2	p__Proteobacteria					0.173913
OTU_972	0	0	0	0	0	2	0	0	0	1	0	0	0	0	0	40	20	1	7	0	0	0	0	p__Proteobacteria					0.173913
OTU_973	0	0	1	58	0	0	2	6	0	3	0	0	0	0	0	0	0	0	0	0	0	1	0	p__Proteobacteria					0.173913
OTU_974	3	0	5	0	0	61	0	2	0	0	0	0	0	0	0	0	0	0	0	0	0	0	0	p__Proteobacteria					0.173913
OTU_975	0	0	0	0	0	0	0	0	0	14	0	0	0	0	0	0	0	0	0	2	27	28	0	p__Proteobacteria					0.173913
OTU_976	0	0	0	0	0	40	0	0	0	0	0	0	0	0	0	7	16	0	1	0	6	0	0	p__Proteobacteria					0.173913
OTU_977	3	0	4	0	0	1	0	1	0	0	0	0	30	0	0	0	0	0	0	0	0	0	30	p__Actinobacteria					0.173913
OTU_978	0	0	0	0	0	0	0	0	0	0	0	1	0	0	0	0	0	0	0	5	4	51	8	p__Proteobacteria					0.173913
OTU_979	0	1	2	1	1	0	0	0	1	12	1	0	0	0	0	0	0	0	0	39	8	0	1	p__Proteobacteria					0.173913
OTU_980	0	0	0	0	0	29	0	1	0	26	0	0	0	0	0	6	4	0	0	0	0	0	0	p__Bacteroidetes					0.173913
OTU_981	0	0	0	0	0	0	0	0	0	0	0	0	0	0	0	3	39	18	6	0	0	0	0	p__Proteobacteria					0.173913
OTU_982	9	7	20	1	0	1	1	1	0	0	0	0	0	0	0	0	0	0	0	0	0	0	25	p__Actinobacteria					0.173913
OTU_983	0	0	0	0	0	27	0	0	0	19	0	0	0	0	0	0	0	0	0	0	0	11	8	p__Firmicutes					0.173913
OTU_984	0	0	0	0	0	0	0	0	0	0	0	0	0	0	0	0	0	0	0	8	7	12	38	p__Proteobacteria					0.173913
OTU_985	0	0	1	0	0	29	0	2	0	6	0	0	0	1	1	1	0	0	0	0	1	20	1	p__Actinobacteria					0.173913
OTU_986	0	0	5	0	0	0	0	0	13	5	40	0	0	0	0	0	0	0	0	0	0	0	0	p__Proteobacteria					0.173913
OTU_987	0	0	0	0	0	1	0	0	0	1	0	0	0	0	0	0	0	0	0	4	7	42	5	p__Proteobacteria					0.173913
OTU_988	0	0	7	0	0	1	0	2	0	2	0	0	0	0	0	0	0	0	0	0	0	0	48	p__Actinobacteria					0.173913
OTU_989	0	0	0	0	0	0	0	0	0	0	0	0	0	0	0	0	0	0	0	5	39	2	14	p__Bacteroidetes					0.173913
OTU_990	0	0	6	8	0	1	0	0	0	2	42	0	0	0	0	0	0	0	0	0	0	0	0	p__Proteobacteria					0.173913
OTU_991	10	0	21	0	0	3	0	0	0	0	0	0	0	0	0	0	0	0	0	0	0	0	25	p__Proteobacteria					0.173913
OTU_992	0	0	0	0	0	0	0	0	0	41	1	0	0	0	0	0	0	0	0	2	7	0	7	p__Proteobacteria					0.173913
OTU_993	0	0	0	0	0	0	0	0	0	7	0	0	0	0	0	0	0	0	0	2	6	1	42	p__Proteobacteria					0.173913
OTU_994	0	0	0	0	44	0	0	4	0	0	0	0	0	1	2	1	0	4	0	0	1	0	0	p__Proteobacteria					0.173913
OTU_995	0	0	1	0	0	8	8	23	0	17	0	0	0	0	0	0	0	0	0	0	0	0	0	p__Proteobacteria					0.173913
OTU_996	0	0	0	0	0	0	0	0	0	12	0	0	0	0	0	0	0	0	0	35	7	2	0	p__Bacteroidetes					0.173913
OTU_997	0	0	0	0	0	1	0	0	0	0	0	0	0	0	0	0	0	0	0	10	23	11	10	p__Bacteroidetes					0.173913
OTU_998	0	0	5	0	0	42	0	4	0	2	1	0	0	0	0	0	0	0	0	0	0	0	0	p__Firmicutes					0.173913
OTU_999	0	0	0	0	0	0	0	0	0	0	0	0	0	0	0	0	0	0	0	10	12	30	2	p__Proteobacteria					0.173913
OTU_1000	0	0	1	0	0	0	0	0	0	21	0	0	1	0	0	7	12	0	0	0	10	0	1	p__Proteobacteria					0.173913
OTU_1001	0	0	1	0	1	0	1	0	0	39	0	0	0	0	0	0	0	0	0	5	0	2	4	p__Proteobacteria					0.173913
OTU_1002	0	0	0	0	0	0	0	0	0	13	0	0	0	0	0	0	0	0	0	9	23	0	8	p__Proteobacteria					0.173913
OTU_1003	0	0	0	0	0	0	0	0	0	0	0	0	0	0	0	0	0	0	0	3	3	44	3	p__Proteobacteria					0.173913
OTU_1004	0	0	0	0	0	0	0	0	0	0	0	0	0	0	0	0	0	0	0	5	5	41	2	p__Proteobacteria					0.173913
OTU_1005	0	0	0	0	0	0	0	0	0	1	0	0	0	0	0	0	0	0	0	15	22	2	12	p__Proteobacteria					0.173913
OTU_1006	0	0	2	0	0	0	0	1	21	7	19	0	0	0	0	0	0	0	0	0	1	0	0	p__Proteobacteria					0.173913
OTU_1007	0	0	0	0	15	1	0	1	0	25	0	0	0	0	0	1	0	0	0	0	1	2	4	p__Proteobacteria					0.173913
OTU_1008	0	0	20	0	1	14	1	3	0	10	0	0	0	0	0	0	0	0	0	0	0	0	0	p__Proteobacteria					0.173913
OTU_1009	0	0	0	0	0	0	0	0	0	29	0	0	0	0	0	0	0	0	0	5	9	0	6	p__Proteobacteria					0.173913
OTU_1010	0	0	36	2	0	2	1	5	0	1	1	0	0	0	0	0	0	0	0	0	0	0	0	p__Proteobacteria					0.173913
OTU_1011	0	0	3	1	0	1	6	32	0	4	0	0	0	0	0	0	0	0	0	0	0	0	1	p__Proteobacteria					0.173913
OTU_1012	0	0	2	0	1	7	0	0	0	0	0	0	0	0	0	0	0	0	0	1	0	7	30	p__Proteobacteria					0.173913
OTU_1013	0	0	0	0	0	0	0	0	0	0	1	0	0	0	0	0	0	0	0	10	19	2	15	p__Proteobacteria					0.173913
OTU_1014	0	0	0	0	0	0	0	0	0	0	0	0	0	0	0	0	0	0	0	10	11	4	22	p__Proteobacteria					0.173913
OTU_1015	0	0	2	0	35	0	0	0	0	1	0	0	0	0	0	0	0	0	0	0	1	2	5	p__Proteobacteria					0.173913
OTU_1016	0	0	3	0	0	0	6	25	0	11	0	0	0	0	0	0	0	0	0	0	0	0	1	p__Proteobacteria					0.173913
OTU_1017	0	0	0	0	0	0	0	0	0	13	0	0	0	0	0	0	0	0	0	7	18	1	7	p__Proteobacteria					0.173913
OTU_1018	0	0	0	0	0	0	0	0	0	0	0	0	0	0	0	0	0	0	0	3	2	39	2	p__Proteobacteria					0.173913
OTU_1019	0	0	0	0	0	0	0	0	0	0	0	0	0	0	0	0	0	0	0	19	9	9	9	p__Proteobacteria					0.173913
OTU_1020	0	0	0	0	0	0	1	0	0	13	1	0	0	0	0	0	0	0	0	10	3	17	0	p__Bacteroidetes					0.173913
OTU_1021	0	0	0	0	0	4	28	11	0	2	0	0	0	0	0	0	0	0	0	0	0	0	0	p__Proteobacteria					0.173913
OTU_1022	0	0	0	0	0	0	0	1	0	2	30	0	0	0	0	1	1	0	0	2	6	0	1	p__Proteobacteria					0.173913
OTU_1023	11	0	24	0	0	0	0	1	4	1	0	0	0	0	0	0	2	0	0	0	1	0	0	p__Proteobacteria					0.173913
OTU_1024	0	0	1	0	0	0	0	0	0	25	0	0	0	0	0	0	0	0	0	9	3	0	6	p__Proteobacteria					0.173913
OTU_1025	7	0	3	0	31	2	0	0	0	0	0	0	0	0	0	0	0	0	0	0	1	0	0	p__Actinobacteria					0.173913
OTU_1026	0	0	0	0	0	0	0	0	0	0	0	0	0	0	0	0	0	0	0	6	2	22	14	p__Proteobacteria					0.173913
OTU_1027	0	0	0	0	0	0	0	0	0	0	0	0	0	0	0	6	32	0	0	3	0	0	3	p__Proteobacteria					0.173913
OTU_1028	20	1	14	0	0	4	0	0	0	0	0	0	0	0	0	0	0	0	1	0	0	0	3	p__Proteobacteria					0.173913
OTU_1029	0	0	0	0	0	0	0	0	0	0	0	0	0	0	0	0	3	0	0	9	18	1	12	p__Proteobacteria					0.173913
OTU_1030	0	0	0	0	0	0	0	0	0	0	0	0	0	0	0	0	0	0	0	2	4	31	6	p__Proteobacteria					0.173913
OTU_1031	0	0	0	0	0	0	0	0	0	1	0	0	0	0	0	20	15	0	0	1	2	0	3	p__Proteobacteria					0.173913
OTU_1032	0	0	3	0	0	0	0	0	0	0	0	0	0	0	0	0	0	0	0	7	10	1	21						0.173913
OTU_1033	0	0	0	0	0	0	0	0	0	0	1	0	0	0	0	0	0	0	0	11	12	6	12	p__Proteobacteria					0.173913
OTU_1034	0	0	1	0	0	0	0	0	0	0	0	0	0	0	0	0	0	0	0	3	19	7	12	p__Proteobacteria					0.173913
OTU_1035	25	3	8	0	0	6	0	0	0	0	0	0	0	0	0	0	0	0	0	0	0	0	0	p__Proteobacteria					0.173913
OTU_1036	1	7	16	0	0	0	1	2	1	1	12	0	0	0	0	0	0	0	0	0	0	0	0	p__Proteobacteria					0.173913
OTU_1037	1	0	18	0	0	7	0	2	0	11	0	0	0	1	0	0	0	0	0	1	0	0	0	p__Proteobacteria					0.173913
OTU_1038	12	3	2	0	1	22	0	0	0	1	0	0	0	0	0	0	0	0	0	0	0	0	0	p__Proteobacteria					0.173913
OTU_1039	0	0	0	0	0	0	0	0	0	0	0	0	0	0	0	11	25	0	0	1	2	0	2	p__Proteobacteria					0.173913
OTU_1040	0	0	0	0	0	0	0	0	0	0	0	0	0	0	0	0	0	1	0	14	15	6	5	p__Bacteroidetes					0.173913
OTU_1041	26	2	11	0	0	2	0	0	0	0	0	0	0	0	0	0	0	0	0	0	0	0	0	p__Proteobacteria					0.173913
OTU_1042	6	0	3	0	1	26	0	1	0	0	0	0	0	0	0	1	2	0	0	0	0	0	0	p__Proteobacteria					0.173913
OTU_1043	0	0	0	0	1	23	0	0	0	3	0	0	0	0	0	0	0	0	0	0	1	3	9	p__Proteobacteria					0.173913
OTU_1044	0	28	5	0	0	3	0	0	1	0	1	0	0	0	0	0	0	0	0	0	0	0	2	p__Proteobacteria					0.173913
OTU_1045	6	0	5	0	0	0	0	0	3	0	26	0	0	0	0	0	0	0	0	0	0	0	0	p__Proteobacteria					0.173913
OTU_1046	0	0	1	0	0	0	5	0	0	0	0	0	1	1	19	0	1	0	1	1	4	1	4	p__Bacteroidetes	c__Flavobacteriia	o__Flavobacteriales	f__[Weeksellaceae]	g__Chryseobacterium	0.173913
OTU_1047	0	0	0	0	0	0	0	0	0	2	0	0	0	0	0	1	28	0	0	2	5	0	1	p__Bacteroidetes					0.173913
OTU_1048	0	0	0	0	0	1	0	0	0	9	0	0	0	0	0	0	0	0	0	20	5	0	4	p__Bacteroidetes					0.173913
OTU_1049	0	0	0	0	0	0	0	0	0	20	0	0	0	0	0	0	0	2	0	8	8	0	1	p__Proteobacteria					0.173913
OTU_1050	0	0	0	0	0	0	0	0	0	0	0	0	0	0	0	0	0	0	0	7	9	17	6	p__Proteobacteria					0.173913
OTU_1051	0	0	9	5	0	2	0	0	0	0	23	0	0	0	0	0	0	0	0	0	0	0	0	p__Proteobacteria					0.173913
OTU_1052	14	0	8	0	0	1	0	0	0	0	0	0	0	0	0	0	0	0	0	6	1	0	8	p__Proteobacteria					0.173913
OTU_1053	0	0	0	0	0	0	0	0	0	28	0	0	0	0	0	0	0	0	0	2	5	3	0	p__Verrucomicrobia					0.173913
OTU_1054	6	8	18	1	0	0	0	0	2	1	1	0	0	0	0	0	0	0	0	0	0	0	0	p__Proteobacteria					0.173913
OTU_1055	0	0	0	0	0	0	4	0	0	24	0	0	0	0	0	0	0	0	0	1	4	1	3	p__Proteobacteria					0.173913
OTU_1056	0	0	0	0	0	0	0	0	0	0	0	0	0	0	0	0	0	0	0	6	7	2	22	p__Proteobacteria					0.173913
OTU_1057	0	4	0	3	0	0	0	0	3	1	24	0	0	0	0	0	0	0	0	0	1	0	0	p__Proteobacteria					0.173913
OTU_1058	0	0	0	0	0	0	3	6	0	24	0	0	0	0	0	0	0	0	0	0	0	2	1	p__Proteobacteria					0.173913
OTU_1059	0	0	0	0	0	0	0	0	0	0	0	0	0	0	0	0	0	0	0	9	18	7	2	p__Proteobacteria					0.173913
OTU_1060	0	0	0	0	0	0	0	0	0	0	0	0	0	0	0	0	0	0	0	7	12	7	10	p__Proteobacteria					0.173913
OTU_1061	0	0	0	0	0	0	0	1	0	1	0	0	0	0	0	0	0	1	0	8	14	5	5	p__Proteobacteria					0.173913
OTU_1062	0	0	0	0	0	6	0	0	0	14	0	0	0	0	0	0	0	0	0	5	1	1	8	p__Bacteroidetes					0.173913
OTU_1063	0	0	0	0	0	2	10	19	0	3	1	0	0	0	0	0	0	0	0	0	0	0	0	p__Proteobacteria					0.173913
OTU_1064	3	6	18	1	0	1	0	1	4	0	0	0	0	0	0	0	0	0	0	0	0	0	0	p__Proteobacteria					0.173913
OTU_1065	10	1	3	0	6	13	0	0	0	1	0	0	0	0	0	0	0	0	0	0	0	0	0	p__Proteobacteria					0.173913
OTU_1066	10	6	10	0	0	8	0	0	0	0	0	0	0	0	0	0	0	0	0	0	0	0	0	p__Proteobacteria					0.173913
OTU_1067	10	3	10	1	1	6	0	1	0	1	0	0	0	0	0	0	0	0	0	0	0	0	0	p__Proteobacteria					0.173913
OTU_1068	0	7	1	9	0	0	2	0	13	0	1	0	0	0	0	0	0	0	0	0	0	0	0	p__Proteobacteria					0.173913
OTU_1069	0	0	0	0	0	1	0	0	0	0	0	0	0	0	0	0	4	0	0	3	11	1	13	p__Proteobacteria					0.173913
OTU_1070	2	0	6	0	0	1	0	0	1	20	0	0	0	0	0	0	0	0	0	0	0	0	3	p__Proteobacteria					0.173913
OTU_1071	0	0	0	0	0	0	0	0	0	1	0	0	0	0	0	0	0	0	0	7	15	4	6	p__Proteobacteria					0.173913
OTU_1072	0	0	1	23	0	0	0	5	0	2	2	0	0	0	0	0	0	0	0	0	0	0	0	p__Proteobacteria					0.173913
OTU_1073	0	0	0	0	0	0	0	0	0	0	0	0	0	0	0	0	0	0	0	5	7	18	3	p__Proteobacteria					0.173913
OTU_1074	0	0	1	0	20	0	0	0	0	0	0	0	0	4	1	0	0	3	2	0	1	0	0	p__Proteobacteria					0.173913
OTU_1075	0	0	1	0	0	9	0	0	0	2	0	0	0	0	0	0	0	0	0	1	5	14	0	p__Actinobacteria					0.173913
OTU_1076	0	2	0	1	2	20	1	6	0	0	0	0	0	0	0	0	0	0	0	0	0	0	0	p__Firmicutes					0.173913
OTU_1077	0	0	0	1	0	16	0	0	0	6	0	0	0	0	0	0	0	0	0	0	0	7	2	p__Actinobacteria					0.173913
OTU_1078	0	0	0	0	0	0	0	0	0	1	0	0	0	0	0	0	3	0	0	14	12	0	2	p__Proteobacteria					0.173913
OTU_1079	0	0	0	0	0	0	0	0	0	15	0	0	0	0	0	5	1	0	0	0	5	0	6	p__Proteobacteria					0.173913
OTU_1080	0	0	2	0	0	0	4	22	0	4	0	0	0	0	0	0	0	0	0	0	0	0	0	p__Proteobacteria					0.173913
OTU_1081	0	0	2	0	0	0	4	20	0	1	0	0	0	0	0	0	0	0	0	2	1	0	1						0.173913
OTU_1082	2	0	4	0	0	1	0	0	0	4	0	0	0	0	0	0	0	0	1	0	0	1	18	p__Proteobacteria					0.173913
OTU_1083	0	0	0	0	0	0	0	0	0	1	0	0	0	0	0	0	0	0	0	6	5	5	14	p__Proteobacteria					0.173913
OTU_1084	0	0	0	0	0	0	0	0	0	1	0	0	0	0	0	0	0	0	0	4	10	5	11	p__Proteobacteria					0.173913
OTU_1085	0	0	2	0	0	0	0	0	0	6	0	0	0	0	0	0	0	0	0	0	0	16	7	p__Proteobacteria					0.173913
OTU_1086	0	0	2	0	0	0	3	16	0	10	0	0	0	0	0	0	0	0	0	0	0	0	0	p__Proteobacteria					0.173913
OTU_1087	0	0	0	0	0	0	0	0	0	0	0	0	0	0	0	0	0	0	0	9	15	5	2	p__Proteobacteria					0.173913
OTU_1088	12	3	5	0	1	7	1	0	0	1	0	0	0	0	0	0	0	0	0	0	0	0	0	p__Proteobacteria					0.173913
OTU_1089	0	0	0	0	0	13	0	0	0	2	0	0	0	0	0	0	0	0	0	3	0	1	11	p__Proteobacteria					0.173913
OTU_1090	0	0	0	0	0	0	0	0	0	0	0	0	0	0	0	0	0	0	0	6	7	12	5	p__Proteobacteria					0.173913
OTU_1091	0	0	0	0	0	17	0	8	0	3	0	0	0	0	0	0	0	0	0	0	0	2	0	p__Firmicutes					0.173913
OTU_1092	0	0	0	0	0	0	0	0	0	2	0	0	0	0	0	10	3	0	15	0	0	0	0	p__Proteobacteria					0.173913
OTU_1093	0	0	0	0	0	1	0	0	3	1	2	0	0	0	1	9	12	0	0	0	0	0	0	p__Proteobacteria					0.173913
OTU_1094	1	0	0	0	0	2	1	0	0	1	0	0	4	0	0	0	0	0	4	0	0	0	16	p__Proteobacteria					0.173913
OTU_1095	13	0	8	0	0	4	0	0	1	0	0	0	3	0	0	0	0	0	0	0	0	0	0	p__Proteobacteria					0.173913
OTU_1096	0	0	0	2	0	0	4	20	2	1	0	0	0	0	0	0	0	0	0	0	0	0	0	p__Proteobacteria					0.173913
OTU_1097	0	0	0	0	0	19	0	0	0	4	0	0	0	0	0	0	0	0	0	1	0	2	3	p__Proteobacteria					0.173913
OTU_1098	13	0	7	0	0	6	0	0	0	0	3	0	0	0	0	0	0	0	0	0	0	0	0	p__Proteobacteria					0.173913
OTU_1099	0	0	0	0	0	0	0	0	0	0	0	0	0	0	0	0	0	0	0	8	9	8	4	p__Proteobacteria					0.173913
OTU_1100	0	0	0	0	0	0	0	0	0	3	0	0	0	0	0	0	0	9	0	15	2	0	0	p__Bacteroidetes					0.173913
OTU_1101	0	0	0	0	0	0	0	0	0	8	0	0	0	0	0	1	0	0	0	3	11	1	4	p__Proteobacteria					0.173913
OTU_1102	19	1	2	0	0	0	0	0	0	0	0	0	0	0	0	0	0	0	4	0	0	0	2	p__Proteobacteria					0.173913
OTU_1103	0	0	1	0	0	0	0	0	0	0	0	0	0	0	0	0	0	0	0	7	5	13	2	p__Proteobacteria					0.173913
OTU_1104	0	0	0	0	0	0	0	0	0	0	0	0	0	0	0	2	0	0	0	3	16	0	7	p__Proteobacteria					0.173913
OTU_1105	0	0	0	0	0	0	0	0	0	0	0	0	0	0	0	0	2	0	0	2	8	0	16	p__Proteobacteria					0.173913
OTU_1106	0	0	0	0	0	15	0	0	0	7	0	0	0	0	0	0	0	0	0	2	1	0	2	p__Bacteroidetes					0.173913
OTU_1107	0	0	9	1	0	2	0	10	0	5	0	0	0	0	0	0	0	0	0	0	0	0	0	p__Firmicutes					0.173913
OTU_1108	0	0	0	0	0	0	0	0	0	0	0	0	0	0	0	2	13	0	4	7	0	0	1	p__Proteobacteria					0.173913
OTU_1109	10	3	9	0	1	4	0	0	0	0	0	0	0	0	0	0	0	0	0	0	0	0	0	p__Proteobacteria					0.173913
OTU_1110	6	3	7	0	1	10	0	0	0	0	0	0	0	0	0	0	0	0	0	0	0	0	0	p__Proteobacteria					0.173913
OTU_1111	0	0	0	0	1	4	1	4	0	12	0	0	0	0	0	0	0	0	0	0	2	1	1	p__Proteobacteria					0.173913
OTU_1112	0	1	2	0	0	2	0	0	0	0	0	0	9	0	1	0	0	0	0	0	0	0	11	p__Actinobacteria					0.173913
OTU_1113	7	2	5	0	1	11	0	0	0	0	0	0	0	0	0	0	0	0	0	0	0	0	0	p__Proteobacteria					0.173913
OTU_1114	0	0	0	0	0	1	0	0	0	0	0	0	0	0	0	0	0	0	0	4	8	6	7	p__Proteobacteria					0.173913
OTU_1115	0	0	0	0	0	0	0	0	0	4	0	0	0	0	0	0	1	0	0	8	8	0	5	p__Proteobacteria					0.173913
OTU_1116	0	0	0	0	0	1	0	0	0	11	0	0	0	0	0	0	0	0	0	2	7	0	5	p__Proteobacteria					0.173913
OTU_1117	0	0	2	0	0	0	0	1	0	13	0	0	0	1	0	0	0	0	0	0	3	4	1	p__Proteobacteria					0.173913
OTU_1118	0	2	11	0	0	1	1	5	1	4	0	0	0	0	0	0	0	0	0	0	0	0	0	p__Proteobacteria					0.173913
OTU_1119	0	0	0	0	0	0	0	0	0	1	0	0	0	0	4	4	13	1	0	0	0	0	2	p__Proteobacteria					0.173913
OTU_1120	0	0	0	0	0	1	0	0	0	9	0	0	0	0	0	0	1	0	0	7	4	0	3	p__Proteobacteria					0.173913
OTU_1121	1	8	5	0	3	7	0	1	0	0	0	0	0	0	0	0	0	0	0	0	0	0	0	p__Proteobacteria					0.173913
OTU_1122	0	0	2	0	0	8	0	1	0	1	0	0	0	0	0	0	0	0	0	0	3	0	10	p__Proteobacteria					0.173913
OTU_1123	7	4	5	0	1	7	0	0	0	1	0	0	0	0	0	0	0	0	0	0	0	0	0	p__Proteobacteria					0.173913
OTU_1124	0	0	0	0	0	0	0	0	0	1	0	0	0	0	0	0	0	0	0	7	10	2	5	p__Proteobacteria					0.173913
OTU_1125	0	0	0	0	0	10	0	0	0	7	0	0	0	0	0	0	0	0	0	0	0	5	3	p__Actinobacteria					0.173913
OTU_1126	0	0	0	0	0	0	0	0	0	0	0	0	0	0	0	0	0	0	0	6	8	6	5	p__Bacteroidetes					0.173913
OTU_1127	0	3	0	3	0	0	0	0	2	17	0	0	0	0	0	0	0	0	0	0	0	0	0	p__Proteobacteria					0.173913
OTU_1128	0	0	0	0	0	1	5	5	0	7	0	0	0	0	0	0	0	0	0	1	0	1	4	p__Proteobacteria					0.173913
OTU_1129	4	5	4	0	0	9	0	0	1	0	1	0	0	0	0	0	0	0	0	0	0	0	0	p__Proteobacteria					0.173913
OTU_1130	0	0	0	0	0	0	0	0	0	1	0	0	0	0	0	0	0	2	0	7	12	0	2	p__Proteobacteria					0.173913
OTU_1131	0	0	0	0	0	2	5	13	0	4	0	0	0	0	0	0	0	0	0	0	0	0	0	p__Proteobacteria					0.173913
OTU_1132	5	7	5	0	0	7	0	0	0	0	0	0	0	0	0	0	0	0	0	0	0	0	0	p__Proteobacteria					0.173913
OTU_1133	0	0	0	0	0	0	0	0	0	6	0	0	0	0	0	0	0	0	0	6	10	0	2	p__Proteobacteria					0.173913
OTU_1134	11	0	1	4	0	2	0	0	0	4	0	0	0	0	1	0	0	0	0	0	0	0	0	p__Proteobacteria					0.173913
OTU_1135	0	0	0	0	0	0	0	0	0	1	0	0	0	0	0	2	13	0	0	3	4	0	0	p__Proteobacteria					0.173913
OTU_1136	0	0	3	0	0	0	0	0	0	6	0	0	0	0	0	0	0	0	0	7	0	1	6	p__Proteobacteria					0.173913
OTU_1137	0	0	1	0	0	1	1	8	0	3	4	0	1	0	0	0	0	0	0	0	0	0	3	p__Proteobacteria					0.173913
OTU_1138	4	3	4	0	0	8	1	0	1	0	1	0	0	0	0	0	0	0	0	0	0	0	0	p__Proteobacteria					0.173913
OTU_1139	0	0	7	3	1	1	2	7	0	1	0	0	0	0	0	0	0	0	0	0	0	0	0	p__Proteobacteria					0.173913
OTU_1140	0	0	1	0	0	0	0	0	0	0	2	0	0	0	0	7	10	0	0	0	2	0	0	p__Proteobacteria					0.173913
OTU_1141	0	0	0	0	0	0	0	0	0	3	0	0	0	0	0	0	0	0	1	4	12	0	2	p__Proteobacteria					0.173913
OTU_1142	3	2	7	0	0	9	0	1	0	0	0	0	0	0	0	0	0	0	0	0	0	0	0	p__Proteobacteria					0.173913
OTU_1143	3	4	9	0	0	5	0	0	0	1	0	0	0	0	0	0	0	0	0	0	0	0	0	p__Proteobacteria					0.173913
OTU_1144	0	0	0	0	0	0	0	0	0	0	5	0	0	0	0	0	0	0	0	1	7	2	7	p__Proteobacteria					0.173913
OTU_1145	0	0	0	0	0	0	0	0	0	0	0	0	0	0	0	0	0	0	0	2	3	15	2	p__Proteobacteria					0.173913
OTU_1146	0	0	0	0	0	7	0	0	0	0	0	0	0	0	0	0	0	0	0	2	0	10	3	p__Firmicutes					0.173913
OTU_1147	0	0	0	0	0	0	0	0	0	7	0	0	0	0	0	0	0	0	0	6	5	0	4	p__Proteobacteria					0.173913
OTU_1148	0	0	0	0	0	0	0	0	0	0	0	0	0	0	0	0	0	0	0	5	3	8	6	p__Proteobacteria					0.173913
OTU_1149	0	0	0	0	0	1	0	0	0	0	12	0	0	0	0	0	0	0	0	0	2	3	3	p__Actinobacteria					0.173913
OTU_1150	6	3	6	0	1	5	0	0	0	0	0	0	0	0	0	0	0	0	0	0	0	0	0	p__Proteobacteria					0.173913
OTU_1151	0	0	2	0	0	3	0	0	0	0	0	0	0	0	0	0	0	13	0	3	0	0	0	p__Firmicutes					0.173913
OTU_1152	0	0	0	4	0	0	0	2	11	0	4	0	0	0	0	0	0	0	0	0	0	0	0	p__Proteobacteria					0.173913
OTU_1153	0	0	0	0	0	0	0	0	0	0	0	0	0	0	0	0	0	0	0	9	7	2	3	p__Proteobacteria					0.173913
OTU_1154	0	0	5	0	0	0	0	0	0	2	0	0	0	0	0	10	4	0	0	0	0	0	0	p__Proteobacteria					0.173913
OTU_1155	0	0	0	0	0	0	0	0	0	0	0	0	0	0	0	0	0	0	0	2	2	10	7	p__Proteobacteria					0.173913
OTU_1156	0	0	0	0	2	3	0	0	0	0	0	0	0	0	0	0	0	0	0	0	1	5	9	p__Proteobacteria					0.173913
OTU_1157	0	0	0	0	0	0	0	0	0	2	0	0	0	0	0	0	0	0	0	8	8	2	0	p__Proteobacteria					0.173913
OTU_1158	0	0	1	1	0	950	0	1	1	288	0	0	0	0	0	0	0	0	0	87	0	0	0	p__Firmicutes					0.130435
OTU_1159	0	0	0	0	0	1087	1	0	0	14	0	0	0	0	0	0	0	0	0	0	0	21	0	p__Actinobacteria					0.130435
OTU_1160	0	1	0	1	1	0	0	0	0	0	978	0	0	0	0	0	0	0	0	2	1	0	2	p__Proteobacteria					0.130435
OTU_1161	0	0	0	0	0	30	0	0	0	134	0	0	0	0	0	0	0	0	603	0	0	0	0						0.130435
OTU_1162	0	1	3	461	0	1	1	1	2	1	0	0	0	0	0	0	0	1	0	1	0	0	0	p__Proteobacteria					0.130435
OTU_1163	0	0	3	0	0	0	1	416	0	17	1	0	0	0	0	0	0	0	0	0	0	0	0	p__Proteobacteria					0.130435
OTU_1164	0	0	0	0	0	0	0	0	0	0	0	0	0	0	0	2	0	301	94	0	0	0	0	p__Actinobacteria					0.130435
OTU_1165	0	0	0	0	0	0	0	0	0	26	0	0	0	0	0	344	16	0	0	0	0	0	0	p__Verrucomicrobia					0.130435
OTU_1166	0	0	0	0	0	0	0	0	0	0	0	0	0	0	0	0	0	0	0	2	0	338	2	p__Actinobacteria					0.130435
OTU_1167	0	0	0	0	0	0	0	0	0	0	0	0	0	0	312	5	0	0	0	1	3	0	0	p__Firmicutes					0.130435
OTU_1168	0	0	0	0	0	0	0	0	0	0	0	0	0	1	0	0	0	214	80	0	0	0	2	p__Bacteroidetes					0.130435
OTU_1169	0	0	0	0	0	0	0	0	0	0	0	0	0	2	269	0	0	0	0	11	0	0	0	p__Actinobacteria					0.130435
OTU_1170	0	0	0	0	0	56	0	0	0	161	0	0	0	0	0	0	0	0	0	0	0	38	0	p__Firmicutes					0.130435
OTU_1171	1	3	1	217	0	1	0	0	0	0	7	0	0	1	0	0	0	1	0	0	0	1	0	p__Proteobacteria					0.130435
OTU_1172	0	0	0	0	0	13	0	0	0	0	0	1	0	0	212	0	0	0	0	1	0	4	1	p__Actinobacteria					0.130435
OTU_1173	0	0	0	1	110	110	0	0	0	6	0	0	0	0	0	0	0	0	0	0	0	0	0	p__Proteobacteria					0.130435
OTU_1174	0	0	0	0	0	209	0	0	2	14	0	0	0	0	0	0	0	0	0	0	0	0	0	p__Proteobacteria					0.130435
OTU_1175	0	0	0	1	0	1	0	12	1	2	197	0	0	0	0	0	0	0	0	0	0	0	0	p__Proteobacteria					0.130435
OTU_1176	0	0	0	0	1	167	0	0	0	1	0	0	1	0	0	0	0	0	0	1	0	32	7	p__Firmicutes					0.130435
OTU_1177	0	0	0	0	1	0	0	1	0	0	0	0	0	0	0	37	33	136	0	0	0	0	0	p__Proteobacteria					0.130435
OTU_1178	0	0	0	3	0	1	0	1	64	0	133	0	0	0	0	0	0	0	0	0	0	0	0	p__Proteobacteria					0.130435
OTU_1179	0	0	0	0	0	0	0	0	0	40	0	0	0	0	0	0	0	0	0	0	13	142	0	p__Proteobacteria					0.130435
OTU_1180	0	0	1	0	1	1	5	4	0	173	0	0	0	0	0	0	0	0	0	0	0	0	0	p__Proteobacteria					0.130435
OTU_1181	0	0	1	0	0	0	1	115	0	54	0	0	0	0	0	0	0	0	0	0	0	12	0	p__Bacteroidetes					0.130435
OTU_1182	0	0	2	1	0	1	0	158	0	15	0	0	0	0	0	0	0	0	0	0	0	0	0	p__Proteobacteria					0.130435
OTU_1183	0	0	0	0	0	0	0	0	0	0	0	0	0	0	0	0	0	0	0	1	7	164	5	p__Proteobacteria					0.130435
OTU_1184	0	0	0	0	0	94	0	0	0	71	0	0	0	0	0	0	0	0	0	8	0	0	0	p__Firmicutes					0.130435
OTU_1185	0	0	125	0	7	0	0	38	0	0	0	0	0	0	0	0	0	0	0	0	1	0	0	p__Proteobacteria					0.130435
OTU_1186	0	0	5	0	158	7	0	0	0	0	0	0	0	0	0	0	0	0	0	0	0	0	0	p__Proteobacteria					0.130435
OTU_1187	0	0	0	0	0	0	0	0	0	4	0	0	0	0	0	0	0	0	158	0	5	0	0	p__Bacteroidetes					0.130435
OTU_1188	0	134	0	0	0	0	0	1	0	0	0	0	0	11	18	0	0	0	1	1	0	0	0	p__Firmicutes					0.130435
OTU_1189	0	0	0	0	0	0	0	0	4	2	157	0	0	0	0	0	0	0	0	0	0	0	0	p__Proteobacteria					0.130435
OTU_1190	0	0	1	0	1	0	134	17	0	0	0	0	0	0	1	0	0	0	0	0	1	0	4						0.130435
OTU_1191	0	0	2	0	0	0	0	0	0	8	144	0	0	0	0	1	0	0	0	0	1	0	0	p__Proteobacteria					0.130435
OTU_1192	1	0	141	1	1	2	4	1	0	0	0	0	0	0	0	0	0	0	0	0	0	0	0	p__Proteobacteria					0.130435
OTU_1193	0	0	142	0	1	1	0	2	0	0	4	0	0	0	0	0	0	0	0	0	0	1	0	p__Proteobacteria					0.130435
OTU_1194	0	0	0	0	0	0	0	0	0	0	0	0	1	8	118	24	0	0	0	0	0	0	0	p__Bacteroidetes					0.130435
OTU_1195	0	1	14	0	0	134	0	0	0	2	0	0	0	0	0	0	0	0	0	0	0	0	0	p__Proteobacteria					0.130435
OTU_1196	0	0	0	0	0	0	0	0	0	2	0	0	0	0	0	60	86	0	0	0	0	0	0	p__Verrucomicrobia					0.130435
OTU_1197	0	0	0	0	0	0	0	0	0	49	0	0	0	0	0	1	3	94	0	0	0	0	0	p__Proteobacteria					0.130435
OTU_1198	0	0	0	0	0	50	0	1	0	80	0	0	0	0	0	0	0	0	0	0	0	16	0	p__Actinobacteria					0.130435
OTU_1199	0	0	0	0	0	0	0	1	0	7	0	0	0	0	0	37	100	0	0	1	0	0	0	p__Proteobacteria					0.130435
OTU_1200	0	130	4	0	0	0	0	4	0	0	0	0	0	0	0	0	0	0	0	0	0	0	0	p__Firmicutes					0.130435
OTU_1201	0	0	0	0	0	67	0	0	0	27	0	0	0	0	0	0	0	0	0	0	0	34	0	p__Firmicutes					0.130435
OTU_1202	0	0	0	0	0	0	0	0	0	0	0	0	0	0	0	113	10	4	0	0	0	0	0	p__Bacteroidetes					0.130435
OTU_1203	0	2	0	0	0	120	0	0	2	1	1	0	0	0	0	0	0	0	0	0	0	0	0	p__Firmicutes					0.130435
OTU_1204	0	0	3	114	0	7	0	0	0	0	0	0	0	0	0	0	0	0	0	0	0	0	0	p__Proteobacteria					0.130435
OTU_1205	0	0	0	0	0	90	0	0	4	0	0	0	0	0	1	0	0	19	1	0	0	0	0	p__Actinobacteria					0.130435
OTU_1206	0	0	0	0	0	0	0	0	0	0	0	0	0	0	0	0	0	0	0	1	2	104	6	p__Proteobacteria					0.130435
OTU_1207	0	2	1	0	56	52	0	0	0	1	0	0	0	0	0	0	0	0	0	0	0	0	0	p__Proteobacteria					0.130435
OTU_1208	1	0	2	0	1	0	1	0	1	102	3	0	0	0	0	0	0	0	0	0	0	0	0	p__Proteobacteria					0.130435
OTU_1209	0	0	89	0	0	14	1	6	0	0	0	0	0	0	0	0	0	0	0	0	0	1	0	p__Proteobacteria					0.130435
OTU_1210	0	0	0	0	0	0	0	0	0	1	100	0	0	0	0	0	0	0	0	0	2	1	2	p__Proteobacteria					0.130435
OTU_1211	0	0	0	0	0	25	0	0	0	34	0	0	0	0	0	0	0	0	0	0	0	46	0	p__Firmicutes					0.130435
OTU_1212	0	0	15	71	0	0	1	1	0	0	14	0	0	0	0	0	0	0	0	0	0	0	0	p__Proteobacteria					0.130435
OTU_1213	0	0	0	0	0	0	0	1	0	0	0	0	0	0	0	85	10	5	0	0	0	0	0	p__Bacteroidetes					0.130435
OTU_1214	0	0	0	0	0	0	0	0	0	21	0	0	0	0	0	0	0	33	0	45	0	0	0	p__Bacteroidetes					0.130435
OTU_1215	0	0	2	0	1	27	0	0	0	0	0	0	0	0	0	0	0	68	0	0	0	0	0	p__Bacteroidetes					0.130435
OTU_1216	0	0	0	0	0	0	0	0	0	3	92	0	0	0	1	0	0	0	0	0	2	0	0	p__Proteobacteria					0.130435
OTU_1217	0	0	0	0	2	0	0	0	0	0	92	0	0	0	0	0	2	0	0	0	0	0	1	p__Actinobacteria					0.130435
OTU_1218	0	0	0	0	0	0	0	6	0	45	0	0	0	0	0	0	0	0	0	0	0	46	0	p__Proteobacteria					0.130435
OTU_1219	48	0	41	0	0	4	1	0	0	0	0	0	0	0	0	0	0	0	0	0	0	0	0	p__Proteobacteria					0.130435
OTU_1220	0	0	0	0	0	62	0	1	0	27	2	0	0	0	0	0	0	0	0	0	0	0	0	p__Bacteroidetes					0.130435
OTU_1221	0	0	0	0	0	0	0	0	0	0	0	0	0	0	0	0	0	0	0	48	29	1	14	p__Actinobacteria					0.130435
OTU_1222	0	0	0	0	5	0	0	0	0	0	0	0	0	0	82	0	0	0	0	0	0	0	5	p__Firmicutes					0.130435
OTU_1223	0	0	0	0	0	0	0	0	0	0	0	0	0	0	0	38	22	28	0	0	0	0	0	p__Proteobacteria					0.130435
OTU_1224	0	0	0	0	1	0	2	77	0	6	0	0	0	0	0	0	0	0	0	0	0	0	0	p__Proteobacteria					0.130435
OTU_1225	0	0	3	0	0	0	0	1	0	0	0	0	50	0	0	0	0	0	0	0	0	0	31	p__Actinobacteria					0.130435
OTU_1226	77	0	0	2	0	0	0	3	0	0	0	0	0	0	0	0	0	0	0	0	0	0	0	p__Bacteroidetes					0.130435
OTU_1227	0	0	0	0	0	66	0	0	0	10	0	0	0	0	0	0	0	0	0	0	0	0	6	p__Proteobacteria					0.130435
OTU_1228	0	0	0	0	0	0	0	0	0	68	0	0	0	0	0	0	0	0	0	0	0	7	5	p__Verrucomicrobia					0.130435
OTU_1229	0	0	0	0	0	0	0	0	0	0	0	0	0	0	1	0	0	0	0	4	3	70	1	p__Proteobacteria					0.130435
OTU_1230	0	0	0	0	0	0	0	0	0	0	0	0	0	0	0	0	0	0	0	0	10	50	18	p__Actinobacteria					0.130435
OTU_1231	0	0	0	0	0	0	0	0	0	24	0	0	0	0	0	0	0	1	32	20	0	0	0	p__Bacteroidetes					0.130435
OTU_1232	0	0	0	0	0	1	0	0	1	45	0	0	0	0	0	0	0	0	0	23	6	0	0	p__Proteobacteria					0.130435
OTU_1233	0	0	0	0	0	0	0	0	0	0	0	0	0	0	0	0	0	0	0	1	5	67	2	p__Proteobacteria					0.130435
OTU_1234	0	65	5	0	0	0	0	2	0	0	0	0	0	0	0	0	1	0	0	0	0	0	1	p__Firmicutes					0.130435
OTU_1235	1	0	63	1	0	3	1	3	0	0	1	0	0	0	0	0	0	0	0	0	0	0	0	p__Proteobacteria					0.130435
OTU_1236	0	1	0	0	0	6	11	53	0	1	1	0	0	0	0	0	0	0	0	0	0	0	0	p__Firmicutes					0.130435
OTU_1237	0	0	0	0	0	0	0	0	0	1	0	0	1	1	0	0	0	0	16	0	3	50	0	p__Actinobacteria					0.130435
OTU_1238	8	0	2	0	1	1	0	0	0	0	0	0	0	0	0	0	0	0	0	0	0	1	59	p__Proteobacteria					0.130435
OTU_1239	0	0	0	0	0	0	0	0	0	0	0	0	0	0	0	0	0	0	0	31	25	15	0	p__Proteobacteria					0.130435
OTU_1240	0	0	0	0	0	0	0	0	0	6	0	0	0	0	0	0	0	38	25	0	0	0	0	p__Bacteroidetes					0.130435
OTU_1241	0	0	1	54	0	0	5	7	0	0	0	0	0	0	0	0	0	0	0	1	0	0	0	p__Proteobacteria					0.130435
OTU_1242	14	0	19	0	0	1	0	0	0	0	0	0	0	0	0	0	0	0	0	0	0	1	33	p__Actinobacteria					0.130435
OTU_1243	0	0	0	0	0	0	0	0	0	0	0	0	0	0	0	0	0	0	0	1	6	59	2	p__Proteobacteria					0.130435
OTU_1244	1	0	20	43	0	0	1	2	0	0	0	0	0	0	0	0	0	0	0	0	0	0	0	p__Proteobacteria					0.130435
OTU_1245	0	1	2	0	0	0	0	62	0	0	0	0	0	0	0	0	0	0	0	2	0	0	0	p__Firmicutes					0.130435
OTU_1246	0	0	0	0	1	23	0	0	0	25	0	0	0	0	0	0	0	0	0	0	16	0	0	p__Proteobacteria					0.130435
OTU_1247	0	0	1	0	0	0	16	29	0	19	0	0	0	0	0	0	0	0	0	0	0	0	0	p__Proteobacteria					0.130435
OTU_1248	0	0	0	0	0	0	0	0	0	1	0	0	0	0	0	0	0	0	0	10	32	0	20	p__Proteobacteria					0.130435
OTU_1249	0	0	0	0	2	57	1	2	0	0	0	0	0	0	0	0	0	0	0	0	0	0	0	p__Firmicutes					0.130435
OTU_1250	0	0	0	0	0	0	0	0	0	39	0	0	0	0	0	0	0	0	0	8	14	0	1	p__Proteobacteria					0.130435
OTU_1251	0	0	0	0	0	0	0	0	0	1	0	0	0	0	0	12	1	0	1	29	17	0	0	p__Proteobacteria					0.130435
OTU_1252	0	0	0	0	0	0	0	0	0	0	0	0	0	0	0	0	0	0	0	4	1	50	5	p__Proteobacteria					0.130435
OTU_1253	0	0	0	0	0	0	0	0	0	1	0	0	0	0	0	0	0	0	0	0	18	24	16	p__Bacteroidetes					0.130435
OTU_1254	0	0	0	0	0	0	0	0	0	0	0	0	0	0	0	0	0	0	0	3	5	51	0	p__Proteobacteria					0.130435
OTU_1255	0	18	1	0	0	32	1	0	0	1	0	0	0	0	0	0	0	0	0	3	0	1	1	p__Proteobacteria					0.130435
OTU_1256	14	0	40	0	0	0	0	0	0	0	1	0	0	0	0	0	0	0	0	0	3	0	0	p__Proteobacteria					0.130435
OTU_1257	0	0	1	0	0	0	10	42	0	4	0	0	0	0	0	0	0	0	0	0	0	0	0	p__Proteobacteria					0.130435
OTU_1258	0	0	0	0	0	0	0	0	0	0	0	0	0	0	0	30	24	0	0	0	2	1	0	p__Proteobacteria					0.130435
OTU_1259	0	0	1	0	0	0	0	0	0	0	0	0	0	0	0	48	3	3	0	0	0	0	0	p__Bacteroidetes					0.130435
OTU_1260	0	0	2	0	0	45	0	7	0	1	0	0	0	0	0	0	0	0	0	0	0	0	0	p__Firmicutes					0.130435
OTU_1261	0	0	0	0	0	0	0	0	0	0	0	0	0	0	0	24	13	14	0	1	0	0	1	p__Proteobacteria					0.130435
OTU_1262	0	0	0	0	0	0	0	0	0	8	0	0	0	0	0	0	0	0	0	0	30	0	15	p__Bacteroidetes					0.130435
OTU_1263	0	0	0	0	0	34	0	1	0	9	0	0	0	0	0	0	0	0	0	0	1	7	0	p__Proteobacteria					0.130435
OTU_1264	0	0	0	0	0	0	0	0	0	5	1	0	0	0	0	42	0	0	0	1	3	0	0	p__Bacteroidetes					0.130435
OTU_1265	0	0	0	0	0	0	0	0	0	0	0	0	0	0	0	0	0	0	0	2	1	44	5	p__Proteobacteria					0.130435
OTU_1266	0	0	47	0	0	2	2	1	0	0	0	0	0	0	0	0	0	0	0	0	0	0	0	p__Proteobacteria					0.130435
OTU_1267	0	0	0	0	0	0	0	0	0	45	0	0	0	0	0	0	0	0	4	3	0	0	0	p__Proteobacteria					0.130435
OTU_1268	0	0	1	2	8	35	1	0	0	1	1	0	0	1	0	0	0	0	0	0	0	0	1	p__Proteobacteria					0.130435
OTU_1269	0	0	0	0	0	0	0	0	4	1	42	0	0	0	0	0	0	0	0	1	1	0	2	p__Proteobacteria					0.130435
OTU_1270	1	0	0	0	0	0	0	0	0	0	0	0	0	0	0	0	0	0	0	3	0	8	38	p__Proteobacteria					0.130435
OTU_1271	0	0	31	0	0	0	1	4	0	14	0	0	0	0	0	0	0	0	0	0	0	0	0	p__Proteobacteria					0.130435
OTU_1272	0	0	0	0	0	0	0	0	0	0	0	0	0	0	0	0	0	0	0	0	9	22	19	p__Bacteroidetes					0.130435
OTU_1273	0	0	0	0	0	0	0	0	0	0	0	0	0	0	0	0	0	0	0	0	5	42	3	p__Proteobacteria					0.130435
OTU_1274	0	0	0	0	0	0	0	0	0	0	0	0	0	0	0	0	0	0	0	3	2	45	0	p__Proteobacteria					0.130435
OTU_1275	0	0	0	0	0	39	0	0	0	9	0	0	0	0	0	0	0	0	0	2	0	0	0	p__Firmicutes					0.130435
OTU_1276	0	0	1	0	6	0	0	1	0	35	0	0	0	0	0	0	0	0	0	0	0	6	0	p__Proteobacteria					0.130435
OTU_1277	0	0	0	0	0	10	0	0	0	0	0	0	0	1	0	0	0	0	25	0	0	0	13	p__Actinobacteria					0.130435
OTU_1278	0	0	0	0	0	27	0	0	0	0	0	0	0	0	0	0	0	0	0	0	1	7	14	p__Proteobacteria					0.130435
OTU_1279	0	0	24	0	0	3	0	0	0	0	20	0	0	0	0	0	0	0	0	0	0	1	0	p__Proteobacteria					0.130435
OTU_1280	0	0	1	0	0	2	1	0	1	39	0	0	0	0	0	0	0	0	0	0	0	2	0	p__Proteobacteria					0.130435
OTU_1281	0	0	0	0	0	0	0	0	0	1	0	0	0	0	0	5	36	0	0	0	3	0	1	p__Proteobacteria					0.130435
OTU_1282	2	0	40	0	0	1	0	3	0	0	0	0	0	0	0	0	0	0	0	0	0	0	0	p__Proteobacteria					0.130435
OTU_1283	0	0	0	0	0	0	0	0	0	0	0	0	0	0	0	0	0	0	0	1	6	31	8	p__Proteobacteria					0.130435
OTU_1284	2	1	0	0	17	26	0	0	0	0	0	0	0	0	0	0	0	0	0	0	0	0	0	p__Proteobacteria					0.130435
OTU_1285	0	1	13	1	23	1	2	0	0	0	0	0	0	1	0	0	0	0	0	1	1	0	0	p__Proteobacteria					0.130435
OTU_1286	0	3	0	6	0	0	0	0	1	34	0	0	0	0	0	0	0	0	0	0	0	0	0	p__Proteobacteria					0.130435
OTU_1287	0	0	0	0	0	0	0	0	0	6	0	0	0	0	4	0	0	0	0	0	0	34	0	p__Firmicutes					0.130435
OTU_1288	0	0	0	0	0	0	0	0	0	0	0	0	0	0	0	0	0	0	0	4	3	35	1	p__Proteobacteria					0.130435
OTU_1289	0	0	0	0	0	0	0	0	0	32	0	0	0	0	0	0	0	0	0	4	7	0	0	p__Firmicutes					0.130435
OTU_1290	0	0	0	0	0	0	0	0	0	0	0	0	0	0	0	0	0	0	0	6	14	1	21						0.130435
OTU_1291	20	0	19	0	0	0	0	0	0	0	3	0	0	0	0	0	0	0	0	0	0	0	0	p__Proteobacteria					0.130435
OTU_1292	0	0	0	0	0	0	0	0	0	6	0	0	0	0	1	0	0	0	0	0	29	0	5	p__Verrucomicrobia					0.130435
OTU_1293	0	0	21	0	1	0	3	16	0	0	0	0	0	0	0	0	0	0	0	0	0	0	0	p__Proteobacteria					0.130435
OTU_1294	0	0	0	0	0	1	0	0	0	2	0	0	0	0	0	28	10	0	0	0	0	0	0	p__Bacteroidetes					0.130435
OTU_1295	0	0	0	0	0	15	0	0	0	20	0	0	0	0	0	0	0	0	0	6	0	0	0	p__Firmicutes					0.130435
OTU_1296	2	0	4	0	0	0	0	0	0	0	35	0	0	0	0	0	0	0	0	0	0	0	0	p__Proteobacteria					0.130435
OTU_1297	0	0	0	0	0	0	0	0	0	0	0	2	0	1	15	0	0	0	0	0	0	1	21	p__Firmicutes					0.130435
OTU_1298	0	0	0	0	0	0	0	0	0	0	0	0	0	0	0	0	0	0	0	5	4	31	0	p__Proteobacteria					0.130435
OTU_1299	0	0	0	0	0	0	0	0	0	0	0	0	0	0	0	33	5	2	0	0	0	0	0	p__Bacteroidetes					0.130435
OTU_1300	0	0	0	0	0	0	0	0	7	0	0	1	0	0	15	0	0	0	0	16	0	0	0	p__Firmicutes					0.130435
OTU_1301	0	0	4	3	0	1	0	0	0	31	0	0	0	0	0	0	0	0	0	0	0	0	0	p__Proteobacteria					0.130435
OTU_1302	0	0	0	0	0	0	0	0	0	0	0	18	0	0	17	0	0	0	0	0	0	4	0	p__Proteobacteria					0.130435
OTU_1303	6	0	26	0	0	1	1	1	0	1	0	0	0	0	0	0	0	0	0	0	0	0	2	p__Proteobacteria					0.130435
OTU_1304	0	0	0	0	0	1	0	0	0	0	0	0	0	0	0	0	0	0	0	8	15	1	13	p__Actinobacteria					0.130435
OTU_1305	0	0	5	0	0	0	7	26	0	0	0	0	0	0	0	0	0	0	0	0	0	0	0	p__Proteobacteria					0.130435
OTU_1306	0	0	1	0	0	0	0	0	0	31	0	0	0	0	0	0	0	0	0	2	1	0	2	p__Proteobacteria					0.130435
OTU_1307	13	0	21	0	0	2	0	1	0	0	0	0	0	0	0	0	0	0	0	0	0	0	0	p__Proteobacteria					0.130435
OTU_1308	0	0	2	0	0	20	0	0	0	14	0	0	0	0	0	0	0	0	0	0	0	0	0	p__Actinobacteria					0.130435
OTU_1309	0	0	0	0	0	0	0	0	0	0	0	0	0	0	0	0	0	0	0	4	0	30	2	p__Proteobacteria					0.130435
OTU_1310	0	0	0	0	0	0	0	0	0	1	0	0	0	0	0	0	0	0	0	3	1	26	4	p__Proteobacteria					0.130435
OTU_1311	0	0	0	0	0	13	0	14	0	6	1	0	0	0	0	0	0	0	0	0	0	0	1	p__Proteobacteria					0.130435
OTU_1312	0	0	0	0	0	1	0	0	0	0	18	0	0	0	0	0	0	0	0	0	4	1	11	p__Proteobacteria					0.130435
OTU_1313	0	0	0	0	0	0	0	0	0	0	0	0	0	0	0	0	1	0	0	14	11	0	9	p__Proteobacteria					0.130435
OTU_1314	0	0	0	0	0	0	0	0	0	0	0	0	0	0	0	0	1	0	0	8	14	0	12	p__Proteobacteria					0.130435
OTU_1315	0	0	0	0	0	0	2	30	0	3	0	0	0	0	0	0	0	0	0	0	0	0	0	p__Proteobacteria					0.130435
OTU_1316	0	0	0	0	6	0	0	0	0	0	0	0	0	0	0	0	0	0	0	0	0	10	19	p__Actinobacteria					0.130435
OTU_1317	0	0	0	0	0	0	0	0	0	0	0	0	0	0	0	0	0	0	0	3	5	27	0	p__Proteobacteria					0.130435
OTU_1318	0	21	0	4	0	0	0	0	6	0	1	0	0	0	0	0	0	1	0	0	1	0	0	p__Proteobacteria					0.130435
OTU_1319	0	0	23	0	0	1	4	5	0	1	0	0	0	0	0	0	0	0	0	0	0	0	0	p__Proteobacteria					0.130435
OTU_1320	0	0	5	0	0	0	23	6	0	0	0	0	0	0	0	0	0	0	0	0	0	0	0	p__Proteobacteria					0.130435
OTU_1321	1	0	8	0	1	19	0	1	0	2	0	0	0	0	0	0	0	0	1	0	0	0	0	p__Proteobacteria					0.130435
OTU_1322	0	0	0	0	0	1	0	0	0	5	0	0	0	0	0	8	17	0	0	0	1	0	1	p__Bacteroidetes					0.130435
OTU_1323	0	0	0	0	1	2	0	0	0	27	0	0	0	0	1	0	0	0	0	0	0	0	2	p__Proteobacteria					0.130435
OTU_1324	0	0	0	0	0	2	0	0	0	27	0	0	0	0	0	0	0	0	0	0	1	0	3	p__Actinobacteria					0.130435
OTU_1325	2	24	6	0	0	0	0	0	1	0	0	0	0	0	0	0	0	0	0	0	0	0	0	p__Proteobacteria					0.130435
OTU_1326	0	0	0	0	0	0	0	0	0	1	0	0	0	0	0	0	1	0	0	3	22	1	4	p__Proteobacteria					0.130435
OTU_1327	0	0	0	3	0	26	0	0	0	2	0	0	0	0	0	0	0	0	0	0	1	0	0	p__Proteobacteria					0.130435
OTU_1328	0	0	0	0	0	0	0	0	0	0	0	17	0	0	10	0	0	0	0	0	0	5	0	p__Proteobacteria					0.130435
OTU_1329	0	0	3	0	0	0	0	21	0	8	0	0	0	0	0	0	0	0	0	0	0	0	0	p__Proteobacteria					0.130435
OTU_1330	0	1	1	7	0	0	0	0	3	18	1	0	0	0	0	0	0	0	0	0	0	0	0	p__Proteobacteria					0.130435
OTU_1331	13	1	12	1	1	3	0	0	0	0	0	0	0	0	0	0	0	0	0	0	0	0	0	p__Proteobacteria					0.130435
OTU_1332	0	0	0	0	0	0	0	1	0	0	0	0	0	0	0	0	0	0	0	5	19	1	5	p__Bacteroidetes					0.130435
OTU_1333	0	0	0	0	0	0	0	0	0	0	0	0	0	0	0	0	0	0	0	23	0	3	5	p__Proteobacteria					0.130435
OTU_1334	0	0	0	0	0	0	0	0	0	0	0	0	0	0	0	0	0	0	0	2	2	27	0	p__Proteobacteria					0.130435
OTU_1335	0	0	0	0	0	0	0	0	0	1	0	0	0	0	0	1	12	0	0	0	8	1	7	p__Proteobacteria					0.130435
OTU_1336	0	0	0	0	0	0	0	0	0	0	0	7	0	0	8	0	0	0	0	1	1	13	0	p__Proteobacteria					0.130435
OTU_1337	0	0	0	1	19	0	1	0	5	4	0	0	0	0	0	0	0	0	0	0	0	0	0						0.130435
OTU_1338	0	0	0	0	0	0	0	0	0	0	0	0	0	0	0	0	0	0	0	5	15	1	9	p__Proteobacteria					0.130435
OTU_1339	0	0	0	0	0	0	0	0	0	3	0	0	0	0	0	0	0	0	0	0	11	0	16	p__Bacteroidetes					0.130435
OTU_1340	0	0	0	0	0	0	0	0	0	0	0	0	0	0	0	0	0	0	0	2	18	0	10	p__Proteobacteria					0.130435
OTU_1341	3	0	0	0	2	1	0	0	1	1	0	1	0	0	18	0	0	0	0	1	1	0	0	p__Firmicutes					0.130435
OTU_1342	0	0	0	0	1	1	0	1	0	1	0	0	0	0	0	0	0	0	0	9	0	14	2	p__Actinobacteria					0.130435
OTU_1343	1	0	10	0	0	2	0	0	0	16	0	0	0	0	0	0	0	0	0	0	0	0	0	p__Proteobacteria					0.130435
OTU_1344	0	0	0	0	0	0	0	0	0	0	0	0	0	0	0	0	3	1	9	0	0	0	16	p__Proteobacteria					0.130435
OTU_1345	0	0	0	0	0	0	0	0	0	1	0	0	0	0	0	0	0	0	0	0	13	5	10	p__Proteobacteria					0.130435
OTU_1346	0	0	0	0	0	0	0	0	0	17	0	0	0	0	0	0	0	0	0	1	4	0	7	p__Proteobacteria					0.130435
OTU_1347	0	0	0	0	0	0	0	16	0	9	0	0	0	0	0	0	0	0	0	0	0	0	4	p__Proteobacteria					0.130435
OTU_1348	0	0	0	0	0	0	0	0	0	0	0	0	0	0	0	15	9	0	0	1	2	0	1	p__Proteobacteria					0.130435
OTU_1349	4	0	0	0	5	18	0	0	0	0	0	0	0	0	1	0	0	0	0	0	0	0	0	p__Proteobacteria					0.130435
OTU_1350	0	0	0	0	0	0	0	0	0	0	0	0	0	0	0	0	0	0	0	1	5	16	6	p__Proteobacteria					0.130435
OTU_1351	0	0	0	0	0	0	0	0	0	0	0	0	0	0	0	0	0	0	0	6	9	1	12	p__Proteobacteria					0.130435
OTU_1352	0	0	0	0	0	0	0	0	0	0	0	0	0	0	0	0	0	0	0	11	10	6	1	p__Proteobacteria					0.130435
OTU_1353	0	0	0	0	0	0	0	0	0	0	22	0	0	0	0	0	0	0	0	3	0	1	2	p__Proteobacteria					0.130435
OTU_1354	0	0	2	0	0	0	0	0	6	1	19	0	0	0	0	0	0	0	0	0	0	0	0	p__Proteobacteria					0.130435
OTU_1355	0	0	0	0	0	0	0	1	0	2	0	0	0	0	0	0	0	0	0	0	9	16	0	p__Actinobacteria					0.130435
OTU_1356	0	0	0	0	0	0	0	0	0	0	0	0	0	0	0	0	0	0	0	8	16	0	4	p__Proteobacteria					0.130435
OTU_1357	1	6	1	12	0	0	1	0	5	1	0	0	0	0	0	0	0	0	0	0	0	0	0	p__Proteobacteria					0.130435
OTU_1358	0	0	0	0	0	0	13	0	0	1	0	0	0	0	1	0	0	0	1	1	5	0	5	p__Bacteroidetes					0.130435
OTU_1359	10	0	4	0	1	10	1	0	0	1	0	0	0	0	0	0	0	0	0	0	0	0	0	p__Proteobacteria					0.130435
OTU_1360	11	1	4	0	0	9	0	1	0	1	0	0	0	0	0	0	0	0	0	0	0	0	0	p__Proteobacteria					0.130435
OTU_1361	0	0	0	0	0	1	0	0	0	19	0	0	0	0	0	0	0	0	0	1	2	1	3	p__Proteobacteria					0.130435
OTU_1362	0	0	0	0	0	0	0	0	0	1	0	0	0	0	0	0	0	0	0	9	1	7	9	p__Proteobacteria					0.130435
OTU_1363	5	1	14	0	1	6	0	0	0	0	0	0	0	0	0	0	0	0	0	0	0	0	0	p__Proteobacteria					0.130435
OTU_1364	0	0	0	0	0	19	0	0	0	5	0	0	0	0	0	0	1	0	0	0	0	2	0	p__Proteobacteria					0.130435
OTU_1365	0	0	2	0	0	21	4	0	0	0	0	0	0	0	0	0	0	0	0	0	0	0	0	p__Proteobacteria					0.130435
OTU_1366	1	0	1	0	0	0	0	0	0	0	0	0	11	1	0	0	5	0	6	0	0	0	1	p__Proteobacteria					0.130435
OTU_1367	0	0	0	1	0	0	0	1	0	0	0	0	0	0	0	0	0	0	0	2	0	7	15	p__Proteobacteria					0.130435
OTU_1368	0	0	0	0	0	0	0	0	0	0	0	0	0	0	0	0	0	1	0	6	15	3	1	p__Bacteroidetes					0.130435
OTU_1369	0	0	0	0	0	0	0	0	0	0	0	0	0	0	0	0	0	0	0	5	3	17	1	p__Proteobacteria					0.130435
OTU_1370	0	0	0	0	0	0	1	10	3	12	0	0	0	0	0	0	0	0	0	0	0	0	0	p__Proteobacteria					0.130435
OTU_1371	0	0	1	0	0	2	21	2	0	0	0	0	0	0	0	0	0	0	0	0	0	0	0	p__Proteobacteria					0.130435
OTU_1372	0	0	0	0	0	0	0	0	0	4	0	0	0	0	0	0	0	15	0	7	0	0	0	p__Bacteroidetes					0.130435
OTU_1373	0	0	0	0	0	0	0	0	0	20	0	0	0	0	0	0	0	0	0	3	3	0	0	p__Firmicutes					0.130435
OTU_1374	0	0	0	0	0	0	0	0	0	21	0	0	0	0	0	0	0	0	3	2	0	0	0	p__Bacteroidetes					0.130435
OTU_1375	0	0	0	0	0	0	0	0	0	0	0	0	12	0	0	0	0	0	12	0	0	0	2	p__Proteobacteria					0.130435
OTU_1376	0	1	0	0	0	2	0	0	0	17	0	0	0	0	0	1	0	0	0	4	0	0	0	p__Proteobacteria					0.130435
OTU_1377	0	0	1	0	0	0	0	0	0	0	0	0	0	1	0	0	0	0	0	2	11	0	10	p__Proteobacteria					0.130435
OTU_1378	6	0	12	0	0	1	0	0	0	1	0	0	0	0	0	0	5	0	0	0	0	0	0	p__Proteobacteria					0.130435
OTU_1379	0	0	0	0	0	0	0	0	0	0	0	0	0	0	0	0	0	0	0	1	2	19	3	p__Proteobacteria					0.130435
OTU_1380	7	1	2	0	0	15	0	0	0	0	0	0	0	0	0	0	0	0	0	0	0	0	0	p__Proteobacteria					0.130435
OTU_1381	15	0	5	0	0	5	0	0	0	0	0	0	0	0	0	0	0	0	0	0	0	0	0	p__Proteobacteria					0.130435
OTU_1382	0	0	0	0	0	0	0	0	0	0	0	0	21	0	0	0	0	0	2	0	0	0	2	p__Proteobacteria					0.130435
OTU_1383	0	0	0	0	0	0	0	2	0	0	0	0	0	0	0	0	0	0	0	15	0	0	8	p__Proteobacteria					0.130435
OTU_1384	0	1	2	0	0	15	1	4	0	0	1	0	0	0	0	0	0	0	0	0	0	0	0	p__Proteobacteria					0.130435
OTU_1385	15	5	2	0	0	0	0	1	1	0	0	0	0	0	0	0	0	0	0	0	0	0	0	p__Proteobacteria					0.130435
OTU_1386	0	0	0	0	0	0	0	0	0	1	0	0	0	0	0	1	0	0	0	2	8	0	12	p__Proteobacteria					0.130435
OTU_1387	0	0	0	0	0	1	0	0	0	1	0	0	0	0	0	0	0	0	0	0	5	3	14	p__Proteobacteria					0.130435
OTU_1388	0	0	0	0	0	3	0	0	0	17	0	0	0	0	0	1	0	0	0	0	3	0	0	p__Proteobacteria					0.130435
OTU_1389	0	0	0	0	0	2	0	0	0	0	0	0	0	0	0	0	0	0	0	0	13	1	8	p__Proteobacteria					0.130435
OTU_1390	0	0	4	0	0	17	0	1	0	2	0	0	0	0	0	0	0	0	0	0	0	0	0	p__Proteobacteria					0.130435
OTU_1391	0	0	0	0	0	0	0	0	0	0	0	0	0	0	0	0	0	0	0	0	2	19	3	p__Proteobacteria					0.130435
OTU_1392	0	0	2	0	0	4	0	0	0	18	0	0	0	0	0	0	0	0	0	0	0	0	0	p__Bacteroidetes					0.130435
OTU_1393	0	0	1	12	0	0	1	3	1	5	0	0	0	0	0	0	0	0	0	0	0	0	0	p__Proteobacteria					0.130435
OTU_1394	0	0	0	0	0	1	0	0	0	0	0	0	0	12	0	0	4	0	0	6	0	0	0	p__Proteobacteria					0.130435
OTU_1395	0	0	4	0	0	0	15	3	0	1	0	0	0	0	0	0	0	0	0	0	0	0	0	p__Proteobacteria					0.130435
OTU_1396	0	0	0	0	0	0	0	0	0	0	0	0	0	0	0	14	5	4	0	0	0	0	0	p__Proteobacteria					0.130435
OTU_1397	0	1	1	0	3	1	0	0	0	1	1	0	0	0	2	0	0	0	0	1	1	1	9	p__Proteobacteria	c__Gammaproteobacteria	o__Pseudomonadales	f__Pseudomonadaceae	g__Pseudomonas	0.130435
OTU_1398	0	0	0	0	0	0	0	0	0	0	0	0	0	0	0	0	0	0	1	4	13	3	1	p__Bacteroidetes					0.130435
OTU_1399	7	2	1	0	0	11	0	1	0	0	0	0	0	0	0	0	0	0	0	0	0	0	0	p__Proteobacteria					0.130435
OTU_1400	0	0	14	0	0	0	1	3	0	4	0	0	0	0	0	0	0	0	0	0	0	0	0	p__Firmicutes					0.130435
OTU_1401	0	0	0	0	0	0	0	0	0	1	0	0	0	0	0	0	0	0	0	2	7	0	12	p__Proteobacteria					0.130435
OTU_1402	0	0	0	0	0	0	0	0	0	0	0	0	0	0	0	0	0	0	0	1	11	4	6	p__Proteobacteria					0.130435
OTU_1403	4	1	6	0	1	8	1	0	0	0	0	0	0	0	0	0	0	0	0	0	0	0	0	p__Proteobacteria					0.130435
OTU_1404	0	0	2	0	6	0	0	1	0	1	0	0	0	0	0	0	0	0	0	0	1	0	10	p__Proteobacteria					0.130435
OTU_1405	0	0	5	0	0	0	1	12	0	2	0	0	0	0	0	0	0	0	0	0	1	0	0	p__Proteobacteria					0.130435
OTU_1406	0	0	10	0	0	3	0	1	0	7	0	0	0	0	0	0	0	0	0	0	0	0	0	p__Proteobacteria					0.130435
OTU_1407	0	0	0	0	0	15	0	0	0	1	0	0	0	0	0	0	0	0	0	0	0	3	2	p__Proteobacteria					0.130435
OTU_1408	0	0	0	0	0	0	0	0	1	13	0	0	0	0	0	0	0	0	0	2	0	0	5	p__Proteobacteria					0.130435
OTU_1409	0	0	0	0	0	0	0	0	0	10	0	0	0	0	0	0	1	0	0	0	7	0	3	p__Proteobacteria					0.130435
OTU_1410	0	0	0	0	0	5	0	1	0	7	0	0	0	0	0	0	0	0	0	0	0	8	0	p__Actinobacteria					0.130435
OTU_1411	0	0	0	0	0	0	0	0	0	0	0	0	0	0	0	0	0	0	12	4	5	0	0	p__Verrucomicrobia					0.130435
OTU_1412	0	0	0	0	0	15	0	0	0	2	0	0	0	0	0	4	0	0	0	0	0	0	0	p__Proteobacteria					0.130435
OTU_1413	0	0	0	0	0	0	0	0	0	0	0	0	0	0	0	0	0	0	0	5	4	0	12	p__Proteobacteria					0.130435
OTU_1414	0	0	0	0	0	0	0	0	0	0	0	0	8	0	0	0	0	0	9	0	0	0	4	p__Proteobacteria					0.130435
OTU_1415	0	0	2	10	0	0	0	0	9	0	0	0	0	0	0	0	0	0	0	0	0	0	0	p__Proteobacteria					0.130435
OTU_1416	0	0	0	0	0	0	0	0	0	8	0	0	0	0	0	0	0	0	0	0	0	5	8	p__Proteobacteria					0.130435
OTU_1417	4	0	10	0	0	0	2	0	0	1	0	0	0	1	0	0	0	0	0	1	1	0	0	p__Proteobacteria					0.130435
OTU_1418	4	1	5	0	0	8	1	0	0	1	0	0	0	0	0	0	0	0	0	0	0	0	0	p__Proteobacteria					0.130435
OTU_1419	0	0	1	0	0	0	0	0	0	0	0	0	0	1	0	0	0	0	0	4	5	1	8	p__Bacteroidetes					0.130435
OTU_1420	0	0	1	0	0	12	1	2	0	1	0	0	0	0	0	0	0	0	0	3	0	0	0	p__Proteobacteria					0.130435
OTU_1421	0	0	0	0	0	0	0	0	0	1	0	0	0	0	0	11	4	1	0	0	3	0	0	p__Proteobacteria					0.130435
OTU_1422	0	0	0	0	0	0	0	0	0	0	0	0	0	0	0	9	4	1	1	0	5	0	0	p__Proteobacteria					0.130435
OTU_1423	2	0	2	0	0	1	0	0	0	0	0	0	1	0	0	0	0	0	0	0	0	0	14	p__Actinobacteria					0.130435
OTU_1424	0	1	0	0	0	1	0	0	0	0	0	0	8	0	0	0	0	0	5	0	0	0	5	p__Proteobacteria					0.130435
OTU_1425	0	0	0	0	0	0	0	0	0	2	0	0	0	0	0	0	0	0	0	12	5	0	1	p__Proteobacteria					0.130435
OTU_1426	13	0	1	0	2	4	0	0	0	0	0	0	0	0	0	0	0	0	0	0	0	0	0	p__Proteobacteria					0.130435
OTU_1427	0	0	0	0	0	0	0	0	0	0	0	0	0	0	0	0	0	0	0	8	5	0	7	p__Bacteroidetes					0.130435
OTU_1428	0	0	3	0	0	0	2	15	0	0	0	0	0	0	0	0	0	0	0	0	0	0	0	p__Proteobacteria					0.130435
OTU_1429	0	0	0	0	0	0	0	0	0	0	0	0	0	0	0	0	0	0	0	2	2	16	0	p__Proteobacteria					0.130435
OTU_1430	0	0	0	0	0	0	0	0	0	0	0	0	0	0	0	0	0	0	0	4	8	0	8	p__Proteobacteria					0.130435
OTU_1431	0	0	0	0	0	0	0	2	0	14	0	0	0	0	0	0	0	0	0	0	0	0	4	p__Proteobacteria					0.130435
OTU_1432	0	1	1	1	0	6659	0	0	0	20	1	0	0	0	0	0	0	0	0	0	0	0	0	p__Firmicutes					0.0869565
OTU_1433	0	0	1	0	1	4439	0	2	1	0	1	0	0	0	0	0	0	0	0	0	0	0	0	p__Bacteroidetes					0.0869565
OTU_1434	0	0	1	0	1	2542	0	0	0	17	1	0	0	0	0	0	0	0	0	0	0	0	0	p__Firmicutes					0.0869565
OTU_1435	0	0	0	1	0	1890	0	0	1	200	0	0	0	0	0	0	0	0	0	0	0	0	0	p__Firmicutes					0.0869565
OTU_1436	1	1	5	0	0	0	0	0	1	0	1447	0	0	0	0	0	0	0	0	0	0	0	0	p__Proteobacteria					0.0869565
OTU_1437	0	0	0	0	0	0	0	0	1	1349	1	0	0	0	0	0	0	0	0	0	0	0	28	p__Proteobacteria					0.0869565
OTU_1438	0	0	0	0	0	843	0	0	0	2	0	0	0	0	0	0	0	0	0	0	0	0	0	p__Chlamydiae					0.0869565
OTU_1439	0	0	2	0	0	0	0	0	0	1	689	0	0	0	0	0	0	0	0	0	0	0	0	p__Proteobacteria					0.0869565
OTU_1440	0	0	7	0	0	0	0	1	0	1	527	0	0	0	0	0	0	0	0	0	0	0	0	p__Proteobacteria					0.0869565
OTU_1441	0	478	0	1	0	0	0	2	1	0	0	0	0	0	0	0	1	0	0	0	0	0	0	p__Firmicutes					0.0869565
OTU_1442	0	0	0	0	0	410	2	0	0	0	1	0	0	0	0	0	0	0	1	0	0	0	0	p__Bacteroidetes					0.0869565
OTU_1443	0	0	0	0	0	0	0	0	0	0	0	0	0	377	2	0	0	0	0	0	0	0	0	p__Firmicutes					0.0869565
OTU_1444	0	0	0	1	0	0	1	0	0	20	0	0	0	0	0	0	0	0	0	0	0	335	0	p__Planctomycetes					0.0869565
OTU_1445	0	0	0	0	330	0	0	0	0	2	0	0	0	0	0	0	0	0	0	0	0	0	0	p__Actinobacteria					0.0869565
OTU_1446	0	0	0	0	0	0	0	0	0	11	0	0	0	0	0	0	0	291	0	0	0	0	0	p__Proteobacteria					0.0869565
OTU_1447	0	0	0	0	0	284	0	0	0	0	0	0	0	0	0	0	0	0	0	0	0	0	3	p__Firmicutes					0.0869565
OTU_1448	0	0	0	0	0	0	0	0	52	0	232	0	0	0	0	0	0	0	0	0	0	0	0	p__Proteobacteria					0.0869565
OTU_1449	0	0	0	0	0	0	0	0	0	2	0	0	0	0	274	0	1	0	0	0	0	0	0	p__Proteobacteria					0.0869565
OTU_1450	0	0	0	0	0	0	0	0	0	0	0	0	2	1	0	0	0	271	0	0	0	0	1	p__Bacteroidetes					0.0869565
OTU_1451	0	1	2	0	0	0	0	1	0	0	270	0	0	0	0	0	0	0	0	0	0	0	0	p__Proteobacteria					0.0869565
OTU_1452	0	0	0	0	0	0	0	0	0	0	0	0	0	0	244	17	0	0	0	0	0	0	0	p__Actinobacteria					0.0869565
OTU_1453	0	0	0	0	0	0	0	0	0	12	0	0	0	0	0	0	0	0	0	0	0	239	0	p__Planctomycetes					0.0869565
OTU_1454	0	0	0	0	0	247	0	0	0	0	0	0	0	0	0	1	0	0	2	0	0	0	0						0.0869565
OTU_1455	0	0	0	0	1	224	0	0	0	24	0	0	0	0	0	0	0	0	0	0	0	0	0	p__Proteobacteria					0.0869565
OTU_1456	0	0	0	0	0	0	0	0	1	0	240	0	0	0	0	0	0	0	0	4	0	0	0	p__Proteobacteria					0.0869565
OTU_1457	0	0	2	223	1	1	1	0	0	0	0	0	0	0	0	0	0	0	0	0	0	0	0	p__Proteobacteria					0.0869565
OTU_1458	0	0	0	0	1	0	0	1	0	216	0	0	0	0	0	0	0	0	0	1	1	0	6	p__Proteobacteria					0.0869565
OTU_1459	0	0	0	0	0	0	0	0	0	0	0	0	0	0	219	0	0	0	0	0	0	5	0	p__Proteobacteria					0.0869565
OTU_1460	0	0	0	0	0	59	0	0	0	157	0	0	0	0	0	0	0	0	0	0	0	0	0	p__Bacteroidetes					0.0869565
OTU_1461	0	0	0	0	0	141	0	1	0	72	0	0	0	0	0	0	0	0	0	0	0	0	0	p__Proteobacteria					0.0869565
OTU_1462	0	0	0	0	0	76	1	0	0	0	1	0	0	0	0	0	0	1	119	0	0	0	0	p__Bacteroidetes					0.0869565
OTU_1463	0	0	0	0	0	0	1	3	0	192	0	0	0	0	0	0	0	0	0	0	0	0	0	p__Proteobacteria					0.0869565
OTU_1464	0	187	0	0	0	3	0	1	0	0	0	0	0	0	0	0	0	0	1	0	0	0	0	p__Proteobacteria					0.0869565
OTU_1465	0	0	18	0	172	1	0	0	0	0	0	0	0	0	0	0	0	0	0	0	0	0	0	p__Proteobacteria					0.0869565
OTU_1466	0	0	0	0	0	0	0	0	10	0	161	0	0	0	0	0	1	0	0	0	0	0	0	p__Proteobacteria					0.0869565
OTU_1467	0	0	0	0	0	0	0	0	0	0	0	3	0	1	166	0	0	1	0	0	0	0	0	p__Proteobacteria					0.0869565
OTU_1468	0	0	0	0	0	0	0	0	0	0	0	0	0	0	0	28	142	1	0	0	0	0	0	p__Proteobacteria					0.0869565
OTU_1469	0	0	0	0	0	157	0	0	0	9	0	0	0	0	0	0	0	0	0	0	0	0	0	p__Proteobacteria					0.0869565
OTU_1470	0	0	0	0	0	0	104	30	0	0	0	0	0	0	0	0	0	0	0	0	0	0	0	p__Firmicutes					0.0869565
OTU_1471	0	0	0	0	0	0	0	0	0	0	0	0	0	0	119	15	0	0	0	0	0	0	0	p__Actinobacteria					0.0869565
OTU_1472	0	1	0	0	0	0	0	3	1	0	128	0	0	0	0	0	0	0	0	0	0	0	0	p__Proteobacteria					0.0869565
OTU_1473	0	0	0	0	0	0	0	0	0	20	0	0	0	0	0	0	0	0	107	0	0	0	0	p__Bacteroidetes					0.0869565
OTU_1474	0	118	3	0	0	1	0	1	1	0	0	0	0	0	0	0	0	0	0	1	0	0	0	p__Proteobacteria					0.0869565
OTU_1475	0	0	0	0	0	0	0	0	0	13	0	0	0	0	0	108	0	0	0	0	0	0	0	p__Bacteroidetes					0.0869565
OTU_1476	0	0	3	0	0	115	0	1	0	1	0	0	0	0	0	0	0	0	0	0	0	0	0	p__Firmicutes					0.0869565
OTU_1477	0	0	116	0	0	3	1	0	0	0	0	0	0	0	0	0	0	0	0	0	0	0	0	p__Proteobacteria					0.0869565
OTU_1478	0	0	0	0	0	0	0	0	13	1	102	0	0	0	0	0	0	0	0	0	0	0	0	p__Proteobacteria					0.0869565
OTU_1479	0	0	0	0	0	58	0	0	0	57	0	0	0	0	0	0	0	0	0	0	0	0	0						0.0869565
OTU_1480	0	0	1	0	0	0	0	0	0	111	0	0	0	0	0	0	0	0	0	2	0	0	0	p__Proteobacteria					0.0869565
OTU_1481	0	0	0	0	0	0	0	0	0	0	0	0	0	0	0	44	68	0	0	0	0	0	0	p__Proteobacteria					0.0869565
OTU_1482	0	0	0	0	0	0	0	0	0	31	0	0	0	0	0	0	0	0	0	0	0	80	0	p__Planctomycetes					0.0869565
OTU_1483	0	0	0	0	4	0	0	0	0	1	101	0	0	0	0	0	1	0	0	0	0	0	0	p__Actinobacteria					0.0869565
OTU_1484	0	0	1	0	0	0	0	0	57	1	48	0	0	0	0	0	0	0	0	0	0	0	0	p__Proteobacteria					0.0869565
OTU_1485	0	0	1	101	0	0	0	1	0	2	0	0	0	0	0	0	1	0	0	0	0	0	0	p__Proteobacteria					0.0869565
OTU_1486	0	0	0	0	0	0	0	0	0	0	0	0	0	0	0	0	0	0	0	9	0	97	0	p__Proteobacteria					0.0869565
OTU_1487	0	0	0	0	0	0	0	0	0	1	100	0	0	0	0	0	3	0	0	0	0	0	0	p__Proteobacteria					0.0869565
OTU_1488	0	0	0	0	0	0	0	0	0	88	0	0	0	0	0	0	16	0	0	0	0	0	0	p__Proteobacteria					0.0869565
OTU_1489	1	0	0	99	0	2	0	0	0	0	0	0	0	0	0	0	0	0	0	0	0	0	0	p__Proteobacteria					0.0869565
OTU_1490	0	0	0	0	0	95	0	3	0	0	0	0	0	0	0	0	0	0	0	0	0	0	0	p__Firmicutes					0.0869565
OTU_1491	0	0	3	0	92	1	0	0	0	0	0	0	0	0	0	0	0	0	0	0	0	0	0	p__Proteobacteria					0.0869565
OTU_1492	0	0	0	0	0	0	0	0	0	11	1	0	0	0	0	0	0	0	0	0	84	0	0	p__Verrucomicrobia					0.0869565
OTU_1493	0	0	2	0	94	0	0	0	0	0	0	0	0	0	0	0	0	0	0	0	0	0	0	p__Proteobacteria					0.0869565
OTU_1494	0	0	0	0	0	0	0	0	0	0	0	0	0	0	0	0	0	0	0	0	0	80	14	p__Proteobacteria					0.0869565
OTU_1495	1	0	1	0	3	84	0	0	0	0	1	0	0	0	0	0	0	1	1	0	1	0	0	p__Proteobacteria					0.0869565
OTU_1496	0	0	0	0	0	0	0	0	0	0	0	0	0	0	0	0	0	0	0	38	53	0	0	p__Proteobacteria					0.0869565
OTU_1497	0	0	0	0	0	0	0	0	0	88	0	0	0	0	0	0	0	0	0	0	2	0	0	p__Proteobacteria					0.0869565
OTU_1498	1	0	6	82	0	0	0	0	0	0	0	0	0	0	0	0	0	0	0	0	0	0	0	p__Proteobacteria					0.0869565
OTU_1499	0	0	0	0	0	0	0	0	0	83	0	0	0	0	0	0	0	0	0	0	4	0	1	p__Proteobacteria					0.0869565
OTU_1500	0	0	0	0	0	0	0	0	0	43	0	0	0	0	0	0	0	0	0	0	0	45	0	p__Verrucomicrobia					0.0869565
OTU_1501	0	0	0	82	0	0	0	0	1	0	4	0	0	0	0	0	0	0	0	0	0	0	0	p__Proteobacteria					0.0869565
OTU_1502	0	0	0	0	0	58	0	0	0	29	0	0	0	0	0	0	0	0	0	0	0	0	0	p__Proteobacteria					0.0869565
OTU_1503	0	0	0	0	0	0	0	0	0	84	0	0	0	0	0	0	0	0	0	3	0	0	0	p__Proteobacteria					0.0869565
OTU_1504	0	0	13	71	0	0	1	1	0	0	0	0	0	0	0	0	0	0	0	0	0	0	0	p__Proteobacteria					0.0869565
OTU_1505	10	0	1	0	73	1	0	0	0	0	0	0	0	0	0	0	0	0	0	0	0	0	0	p__Proteobacteria					0.0869565
OTU_1506	0	0	0	0	0	0	0	0	0	79	0	0	0	0	0	0	0	0	0	0	0	4	0	p__Proteobacteria					0.0869565
OTU_1507	0	0	0	0	0	0	0	0	0	78	0	0	0	0	0	0	0	1	0	1	0	2	0	p__Proteobacteria					0.0869565
OTU_1508	0	0	0	0	0	0	0	0	0	0	0	0	0	0	80	0	0	0	0	0	2	0	0	p__Actinobacteria					0.0869565
OTU_1509	0	0	0	0	0	0	0	0	0	0	0	0	0	0	0	0	0	0	0	0	2	78	1	p__Proteobacteria					0.0869565
OTU_1510	0	1	0	0	0	0	0	0	2	0	77	0	0	0	0	0	0	0	0	0	0	0	0	p__Proteobacteria					0.0869565
OTU_1511	0	0	0	0	0	59	0	0	0	0	0	0	0	1	0	0	0	0	0	0	0	19	0	p__Firmicutes					0.0869565
OTU_1512	0	0	0	0	1	8	0	0	1	67	0	0	0	0	0	0	0	0	0	0	0	0	0	p__Proteobacteria					0.0869565
OTU_1513	0	0	0	0	0	0	0	0	0	0	0	0	0	70	1	0	0	1	0	0	1	3	0	p__Firmicutes					0.0869565
OTU_1514	0	0	0	0	0	0	0	0	0	64	0	0	0	0	0	0	0	0	0	0	0	12	0	p__Proteobacteria					0.0869565
OTU_1515	0	0	54	0	20	0	0	1	0	0	0	0	0	0	0	0	0	0	0	0	0	0	0	p__Proteobacteria					0.0869565
OTU_1516	0	0	0	1	0	0	0	1	0	31	1	0	0	0	0	0	0	0	0	40	0	0	0	p__Verrucomicrobia					0.0869565
OTU_1517	0	0	0	1	0	0	0	0	3	0	0	0	0	0	69	0	0	0	0	0	0	0	0	p__Bacteroidetes					0.0869565
OTU_1518	0	0	0	0	0	0	0	0	0	33	0	0	0	0	0	0	39	0	0	0	0	0	1	p__Bacteroidetes					0.0869565
OTU_1519	0	0	67	1	0	0	1	2	0	1	0	0	0	0	0	0	0	0	0	0	0	0	0	p__Proteobacteria					0.0869565
OTU_1520	0	0	7	0	0	0	1	64	0	0	0	0	0	0	0	0	0	0	0	0	0	0	0	p__Firmicutes					0.0869565
OTU_1521	0	0	0	0	1	57	0	0	0	13	0	0	0	0	0	0	0	0	0	0	0	0	0	p__Actinobacteria					0.0869565
OTU_1522	0	0	24	0	0	0	0	0	0	46	0	0	0	0	0	0	0	0	0	0	0	0	0	p__Proteobacteria					0.0869565
OTU_1523	0	0	0	0	0	0	0	0	0	0	66	0	0	0	0	0	0	0	0	0	0	2	1	p__Proteobacteria					0.0869565
OTU_1524	0	0	0	0	0	60	0	0	0	9	0	0	0	0	0	0	0	0	0	0	0	0	0	p__Firmicutes					0.0869565
OTU_1525	0	0	0	0	0	0	0	0	0	0	0	0	0	0	0	59	10	0	0	0	0	0	0	p__Acidobacteria					0.0869565
OTU_1526	0	61	1	1	0	0	0	0	0	0	0	0	0	0	0	0	0	3	0	1	1	0	0	p__Proteobacteria					0.0869565
OTU_1527	0	0	0	0	0	0	0	0	0	0	0	0	0	0	0	0	34	0	33	0	0	0	0	p__Firmicutes					0.0869565
OTU_1528	0	0	0	0	0	65	0	0	0	2	0	0	0	0	0	0	0	0	0	0	0	0	0	p__Proteobacteria					0.0869565
OTU_1529	0	0	0	0	0	0	0	0	0	0	0	0	0	0	0	0	0	0	0	2	0	63	1	p__Proteobacteria					0.0869565
OTU_1530	0	0	0	0	0	0	0	0	0	0	0	0	0	0	0	0	0	0	0	3	0	61	1	p__Proteobacteria					0.0869565
OTU_1531	1	0	0	0	0	0	0	0	14	0	48	0	0	0	0	0	0	0	0	0	0	0	0	p__Proteobacteria					0.0869565
OTU_1532	0	0	0	0	0	0	0	0	14	0	49	0	0	0	0	0	0	0	0	0	0	0	0	p__Proteobacteria					0.0869565
OTU_1533	0	0	0	0	0	0	0	0	0	0	0	0	0	0	0	0	0	53	0	8	0	0	1	p__Proteobacteria					0.0869565
OTU_1534	0	0	0	0	0	0	0	0	0	24	0	0	0	0	0	37	0	0	0	0	0	0	0	p__Bacteroidetes					0.0869565
OTU_1535	0	0	0	0	0	0	0	0	0	0	0	0	0	0	0	32	28	0	0	0	0	0	0						0.0869565
OTU_1536	0	1	0	0	0	0	0	1	0	6	0	1	1	0	0	0	0	0	0	48	0	0	1	p__Proteobacteria					0.0869565
OTU_1537	0	0	0	1	0	55	0	0	2	1	0	0	0	0	0	0	0	0	0	0	0	0	0	p__Proteobacteria					0.0869565
OTU_1538	0	0	0	0	0	0	0	0	13	0	46	0	0	0	0	0	0	0	0	0	0	0	0	p__Proteobacteria					0.0869565
OTU_1539	0	0	0	0	0	0	0	0	0	0	0	4	1	0	0	0	53	0	0	0	0	0	0	p__Firmicutes					0.0869565
OTU_1540	0	0	0	0	0	0	0	0	4	54	0	0	0	0	0	0	0	0	0	0	0	0	0	p__Proteobacteria					0.0869565
OTU_1541	0	0	0	0	0	0	0	0	0	0	0	0	0	0	0	0	0	0	0	0	0	52	5	p__Proteobacteria					0.0869565
OTU_1542	0	0	0	0	0	40	0	0	0	16	0	0	0	0	0	0	0	0	0	0	0	0	0	p__Proteobacteria					0.0869565
OTU_1543	0	0	0	0	0	0	0	0	0	48	0	0	0	0	0	0	0	0	0	1	6	0	0	p__Proteobacteria					0.0869565
OTU_1544	0	0	0	0	0	0	0	0	0	53	0	0	0	0	0	0	0	0	0	2	0	0	0	p__Proteobacteria					0.0869565
OTU_1545	0	0	0	8	0	0	0	0	47	0	0	0	0	0	0	0	0	0	0	0	0	0	0	p__Proteobacteria					0.0869565
OTU_1546	0	0	0	0	0	0	0	2	0	52	0	0	0	0	0	0	0	0	0	0	0	0	0	p__Proteobacteria					0.0869565
OTU_1547	0	0	0	0	0	0	0	0	0	1	0	0	0	0	0	0	0	0	0	1	38	1	12	p__Proteobacteria					0.0869565
OTU_1548	0	0	0	0	0	0	0	0	0	21	0	0	0	0	1	29	1	0	0	0	0	0	0	p__Proteobacteria					0.0869565
OTU_1549	0	0	0	0	0	0	0	0	0	26	0	0	0	0	0	0	0	0	0	25	0	0	1	p__Proteobacteria					0.0869565
OTU_1550	0	0	0	0	0	47	0	0	0	5	0	0	0	0	0	0	0	0	0	0	0	0	0	p__Bacteroidetes					0.0869565
OTU_1551	0	0	0	0	0	0	0	0	0	32	0	0	0	0	0	0	0	0	0	0	20	0	0	p__Proteobacteria					0.0869565
OTU_1552	0	0	0	0	0	1	0	0	0	0	1	0	0	0	0	26	22	0	0	1	0	0	0	p__Proteobacteria					0.0869565
OTU_1553	0	0	0	0	0	0	0	0	0	0	0	0	0	0	0	43	7	1	0	0	0	0	0	p__Bacteroidetes					0.0869565
OTU_1554	0	0	0	0	0	48	0	0	0	2	0	0	0	0	0	0	0	0	0	0	0	0	0	p__Firmicutes					0.0869565
OTU_1555	0	0	1	0	0	41	0	0	0	5	1	0	0	0	0	0	0	0	0	0	0	0	1	p__Proteobacteria					0.0869565
OTU_1556	0	0	1	0	0	0	0	1	1	39	0	0	0	0	7	0	0	0	0	0	0	0	0	p__Proteobacteria					0.0869565
OTU_1557	0	0	0	0	0	0	0	0	0	0	0	0	0	0	6	0	0	43	0	0	0	0	0	p__Actinobacteria					0.0869565
OTU_1558	0	0	1	0	0	0	0	0	0	45	0	0	0	0	0	0	0	0	0	0	0	0	2	p__Proteobacteria					0.0869565
OTU_1559	0	0	0	0	0	42	0	2	0	1	0	0	0	0	0	0	0	0	0	0	0	1	0	p__Firmicutes					0.0869565
OTU_1560	0	0	1	0	0	0	0	1	8	0	35	0	0	0	0	0	0	0	0	0	0	0	0	p__Proteobacteria					0.0869565
OTU_1561	0	0	0	0	0	0	0	0	0	14	0	0	0	0	1	0	0	0	0	30	0	0	0	p__Proteobacteria					0.0869565
OTU_1562	0	0	0	0	0	0	0	0	0	3	0	0	0	0	42	0	0	0	0	0	0	0	0	p__Proteobacteria					0.0869565
OTU_1563	0	0	0	0	0	0	0	0	0	20	0	0	0	0	0	0	0	0	0	24	0	0	0	p__Firmicutes					0.0869565
OTU_1564	0	0	0	0	0	0	0	0	0	4	0	0	0	0	0	0	0	40	0	0	0	0	0	p__Proteobacteria					0.0869565
OTU_1565	0	0	0	0	0	0	0	0	0	3	0	0	0	0	0	0	0	0	0	40	0	0	0	p__Proteobacteria					0.0869565
OTU_1566	0	0	0	0	0	34	0	0	0	9	0	0	0	0	0	0	0	0	0	0	0	0	0	p__Proteobacteria					0.0869565
OTU_1567	0	0	0	0	0	0	0	0	0	0	0	0	0	0	40	0	0	0	0	0	2	0	0	p__Actinobacteria					0.0869565
OTU_1568	33	0	9	0	0	0	0	0	0	0	0	0	0	0	0	0	0	0	0	0	0	0	0	p__Proteobacteria					0.0869565
OTU_1569	0	0	0	0	0	0	0	0	0	3	0	0	0	0	0	0	0	0	0	0	0	0	39	p__Bacteroidetes					0.0869565
OTU_1570	0	0	15	0	0	0	0	0	0	27	0	0	0	0	0	0	0	0	0	0	0	0	0	p__Proteobacteria					0.0869565
OTU_1571	0	0	0	0	0	0	0	0	0	0	0	0	0	0	0	14	28	0	0	0	0	0	0	p__Proteobacteria					0.0869565
OTU_1572	1	37	3	0	0	0	0	0	0	0	0	0	0	0	0	0	0	0	0	0	0	0	0	p__Proteobacteria					0.0869565
OTU_1573	0	0	0	0	0	0	0	2	0	39	0	0	0	0	0	0	0	0	0	0	0	0	0	p__Proteobacteria					0.0869565
OTU_1574	0	37	0	0	0	0	0	2	0	0	0	0	0	0	1	0	0	0	0	0	0	0	0	p__Firmicutes					0.0869565
OTU_1575	0	0	0	0	0	0	0	0	0	31	0	0	0	0	0	0	0	1	0	1	5	0	1	p__Proteobacteria					0.0869565
OTU_1576	0	0	0	0	0	1	0	0	5	0	32	0	0	0	0	0	0	1	0	0	0	0	0	p__Proteobacteria					0.0869565
OTU_1577	0	0	0	0	0	0	0	0	0	1	0	0	0	0	0	0	0	0	0	0	21	16	1	p__Actinobacteria					0.0869565
OTU_1578	0	0	0	0	0	0	35	3	1	0	0	0	0	0	0	0	0	0	0	0	0	0	0	p__Proteobacteria					0.0869565
OTU_1579	0	0	0	0	0	0	0	0	0	0	0	0	0	0	0	0	0	0	0	1	0	36	2	p__Proteobacteria					0.0869565
OTU_1580	0	0	0	0	0	1	9	29	0	0	0	0	0	0	0	0	0	0	0	0	0	0	0	p__Proteobacteria					0.0869565
OTU_1581	0	0	0	0	0	26	0	0	0	13	0	0	0	0	0	0	0	0	0	0	0	0	0	p__Firmicutes					0.0869565
OTU_1582	0	0	0	0	0	6	0	0	0	0	0	0	0	0	0	0	0	0	33	0	0	0	0	p__Proteobacteria					0.0869565
OTU_1583	0	0	0	0	0	0	34	5	0	0	0	0	0	0	0	0	0	0	0	0	0	0	0	p__Proteobacteria					0.0869565
OTU_1584	0	33	1	0	0	3	0	1	0	0	0	0	0	0	0	0	0	0	0	0	0	0	0	p__Proteobacteria					0.0869565
OTU_1585	0	0	1	0	11	0	0	0	0	0	25	0	0	0	0	0	0	0	0	0	0	1	0	p__Proteobacteria					0.0869565
OTU_1586	0	0	0	0	0	0	0	0	0	0	0	0	0	0	0	0	0	0	0	4	1	33	0	p__Proteobacteria					0.0869565
OTU_1587	0	0	0	0	0	0	0	0	0	0	0	0	0	0	0	0	0	0	0	0	1	35	2	p__Proteobacteria					0.0869565
OTU_1588	0	0	0	0	0	0	0	0	0	36	0	0	0	0	0	0	0	0	0	0	2	0	0	p__Bacteroidetes					0.0869565
OTU_1589	0	30	2	0	0	1	0	0	0	1	1	0	0	0	0	0	0	1	0	1	0	0	0	p__Proteobacteria					0.0869565
OTU_1590	0	0	0	2	0	34	0	0	0	0	1	0	0	0	0	0	0	0	0	0	0	0	0	p__Proteobacteria					0.0869565
OTU_1591	0	0	0	0	0	0	0	0	0	0	0	0	0	0	0	0	0	0	0	2	0	34	1	p__Proteobacteria					0.0869565
OTU_1592	0	0	0	0	0	0	0	0	2	0	0	0	0	0	0	0	0	0	0	0	0	35	0	p__Bacteroidetes					0.0869565
OTU_1593	0	0	0	0	0	9	0	0	0	28	0	0	0	0	0	0	0	0	0	0	0	0	0	p__Firmicutes					0.0869565
OTU_1594	0	0	0	0	0	0	0	0	0	0	0	0	0	0	1	0	0	0	0	2	1	32	0	p__Proteobacteria					0.0869565
OTU_1595	0	0	0	0	0	0	0	0	0	29	1	0	0	0	0	0	0	0	0	0	5	0	1	p__Proteobacteria					0.0869565
OTU_1596	0	0	0	0	0	0	0	0	0	0	0	0	0	0	0	5	30	0	1	0	0	0	0	p__Proteobacteria					0.0869565
OTU_1597	0	0	0	0	0	0	0	0	0	1	0	0	0	0	0	0	0	0	9	0	0	0	26	p__Proteobacteria					0.0869565
OTU_1598	0	0	0	32	0	0	0	0	0	0	3	0	0	1	0	0	0	0	0	0	0	0	0	p__Proteobacteria					0.0869565
OTU_1599	0	0	1	0	0	0	0	0	0	30	0	0	0	0	0	1	3	0	0	0	0	0	0	p__Proteobacteria					0.0869565
OTU_1600	0	29	4	0	0	0	0	0	1	0	1	0	0	0	0	0	0	0	0	0	0	0	0	p__Proteobacteria					0.0869565
OTU_1601	0	0	0	0	0	0	0	0	0	0	0	0	0	0	0	0	0	0	0	3	1	30	1	p__Proteobacteria					0.0869565
OTU_1602	0	0	0	0	0	0	0	0	0	12	0	0	0	0	1	0	0	0	0	0	0	0	22	p__Proteobacteria					0.0869565
OTU_1603	0	0	0	0	0	0	0	0	0	5	0	0	0	0	0	0	0	0	0	29	0	1	0	p__Verrucomicrobia					0.0869565
OTU_1604	0	30	0	4	0	0	0	0	0	0	1	0	0	0	0	0	0	0	0	0	0	0	0	p__Proteobacteria					0.0869565
OTU_1605	0	0	0	0	0	0	0	0	0	0	0	0	0	0	0	0	0	0	0	0	2	33	0	p__Proteobacteria					0.0869565
OTU_1606	0	0	0	0	0	0	0	0	0	13	0	0	0	0	0	0	0	0	0	0	0	22	0	p__Firmicutes					0.0869565
OTU_1607	0	0	0	0	0	0	0	0	0	0	0	0	0	0	0	0	0	0	0	2	1	30	1	p__Proteobacteria					0.0869565
OTU_1608	0	0	0	0	0	0	0	0	0	0	0	0	0	0	0	0	0	0	0	1	3	29	1	p__Proteobacteria					0.0869565
OTU_1609	0	0	1	0	29	1	0	0	0	0	0	0	0	0	0	0	0	0	0	0	3	0	0	p__Proteobacteria					0.0869565
OTU_1610	0	0	0	0	0	0	0	0	0	27	1	0	0	0	0	0	0	0	0	0	0	0	6	p__Proteobacteria					0.0869565
OTU_1611	0	31	0	0	0	0	0	2	0	0	1	0	0	0	0	0	0	0	0	0	0	0	0	p__Firmicutes					0.0869565
OTU_1612	0	0	0	0	0	0	0	0	0	0	0	0	0	0	0	0	0	0	0	3	0	30	1	p__Proteobacteria					0.0869565
OTU_1613	0	0	0	0	2	32	0	0	0	0	0	0	0	0	0	0	0	0	0	0	0	0	0	p__Proteobacteria					0.0869565
OTU_1614	0	0	0	0	0	0	28	6	0	0	0	0	0	0	0	0	0	0	0	0	0	0	0	p__Proteobacteria					0.0869565
OTU_1615	0	0	0	0	0	0	0	0	0	0	0	0	0	0	0	11	18	0	1	1	1	1	0	p__Proteobacteria					0.0869565
OTU_1616	0	0	29	1	0	1	0	0	0	2	0	0	0	0	0	0	0	0	0	0	0	0	0	p__Proteobacteria					0.0869565
OTU_1617	0	0	25	0	0	7	1	0	0	0	0	0	0	0	0	0	0	0	0	0	0	0	0	p__Proteobacteria					0.0869565
OTU_1618	0	0	0	0	0	30	0	0	0	3	0	0	0	0	0	0	0	0	0	0	0	0	0	p__Proteobacteria					0.0869565
OTU_1619	0	0	0	0	0	1	0	8	0	21	0	0	0	0	0	0	0	0	0	0	0	1	1	p__Proteobacteria					0.0869565
OTU_1620	0	0	1	2	1	0	0	0	0	27	1	0	0	0	0	0	0	0	0	0	0	0	0	p__Proteobacteria					0.0869565
OTU_1621	0	0	0	0	0	30	0	0	0	2	0	0	0	0	0	0	0	0	0	0	0	0	0	p__Firmicutes					0.0869565
OTU_1622	0	0	0	0	0	27	0	0	0	5	0	0	0	0	0	0	0	0	0	0	0	0	0	p__Proteobacteria					0.0869565
OTU_1623	0	0	28	0	0	1	0	0	2	0	0	0	0	0	0	0	0	0	0	0	0	0	0	p__Firmicutes					0.0869565
OTU_1624	0	0	0	0	0	27	0	0	1	3	0	0	0	0	0	0	0	0	0	0	0	0	0	p__Proteobacteria					0.0869565
OTU_1625	0	0	2	0	0	0	1	0	0	0	0	0	0	28	0	0	0	0	0	0	0	0	0	p__Actinobacteria					0.0869565
OTU_1626	0	0	0	0	0	0	0	0	0	0	0	0	0	0	0	0	0	0	0	2	0	29	0	p__Proteobacteria					0.0869565
OTU_1627	0	0	0	0	0	0	0	0	0	3	0	0	0	0	0	0	0	0	0	0	0	28	0	p__Bacteroidetes					0.0869565
OTU_1628	0	0	0	0	0	0	0	0	0	0	0	0	0	0	0	0	0	0	0	0	2	29	0	p__Proteobacteria					0.0869565
OTU_1629	0	0	0	29	0	0	0	0	0	0	0	0	0	0	0	0	0	0	0	0	2	0	0	p__Proteobacteria					0.0869565
OTU_1630	0	0	1	0	0	2	1	0	1	0	25	0	0	0	0	0	0	0	0	0	0	0	0	p__Proteobacteria					0.0869565
OTU_1631	0	0	0	0	0	0	0	0	0	0	0	0	0	0	1	0	0	1	0	0	21	0	7	p__Bacteroidetes					0.0869565
OTU_1632	0	0	1	0	0	1	1	7	0	0	0	0	0	0	0	0	0	0	0	1	0	0	18	p__Proteobacteria					0.0869565
OTU_1633	0	0	0	0	0	0	0	0	0	0	0	1	23	1	0	4	0	0	0	0	0	0	0	p__[Thermi]					0.0869565
OTU_1634	0	0	0	0	15	12	0	0	0	1	0	0	0	0	0	0	0	0	0	0	0	0	1	p__Proteobacteria					0.0869565
OTU_1635	0	0	0	0	0	0	0	23	0	5	1	0	0	0	0	0	0	0	0	0	0	0	0	p__Proteobacteria					0.0869565
OTU_1636	0	0	0	0	0	0	0	0	0	0	0	0	8	0	0	0	0	0	0	0	0	0	21	p__Actinobacteria					0.0869565
OTU_1637	0	0	0	0	0	0	27	2	0	0	0	0	0	0	0	0	0	0	0	0	0	0	0						0.0869565
OTU_1638	0	0	5	0	0	0	0	0	0	24	0	0	0	0	0	0	0	0	0	0	0	0	0	p__Proteobacteria					0.0869565
OTU_1639	0	0	0	0	0	0	0	0	0	0	0	0	0	0	0	25	4	0	0	0	0	0	0	p__Bacteroidetes					0.0869565
OTU_1640	0	0	0	0	0	0	0	0	0	1	0	0	0	0	0	1	23	0	0	1	0	0	2	p__Proteobacteria					0.0869565
OTU_1641	0	0	0	0	1	18	0	0	0	7	0	0	0	0	0	0	0	0	0	0	0	1	1	p__Proteobacteria					0.0869565
OTU_1642	0	0	19	0	7	1	0	0	0	0	0	0	0	1	0	0	0	0	0	0	0	0	0	p__Acidobacteria					0.0869565
OTU_1643	0	0	21	0	0	0	1	1	0	0	0	0	0	0	0	0	0	0	0	0	0	0	5	p__Proteobacteria					0.0869565
OTU_1644	0	0	0	0	0	0	0	0	0	0	0	0	0	0	0	19	8	0	0	0	0	0	1	p__Proteobacteria					0.0869565
OTU_1645	0	25	1	0	0	0	0	0	0	0	0	2	0	0	0	0	0	0	0	0	0	0	0	p__Firmicutes					0.0869565
OTU_1646	1	0	7	0	0	0	0	0	0	0	0	0	0	0	0	0	0	0	0	0	0	0	20	p__Actinobacteria					0.0869565
OTU_1647	0	0	0	0	0	0	0	0	0	0	0	0	0	0	0	0	0	0	0	3	0	25	0	p__Proteobacteria					0.0869565
OTU_1648	0	0	0	0	1	5	0	0	0	21	0	0	0	0	0	0	0	0	0	0	0	0	0	p__Proteobacteria					0.0869565
OTU_1649	0	0	0	0	0	0	0	0	0	0	0	0	0	0	0	0	0	0	0	3	0	23	1	p__Proteobacteria					0.0869565
OTU_1650	0	0	0	17	0	10	0	0	0	0	0	0	0	0	0	0	0	0	0	0	0	0	0	p__Proteobacteria					0.0869565
OTU_1651	0	0	1	9	0	0	0	1	1	14	0	0	0	0	0	0	0	0	0	0	0	0	0	p__Proteobacteria					0.0869565
OTU_1652	0	0	0	2	0	0	0	1	22	1	0	0	0	0	0	0	0	0	0	0	0	0	0	p__Proteobacteria					0.0869565
OTU_1653	0	0	0	0	0	0	0	0	0	0	0	0	0	1	0	0	0	0	0	2	0	0	23	p__Actinobacteria					0.0869565
OTU_1654	0	0	0	0	0	0	19	6	1	0	0	0	0	0	0	0	0	0	0	0	0	0	0	p__Proteobacteria					0.0869565
OTU_1655	0	0	0	0	0	0	0	0	0	0	0	0	0	0	0	0	0	0	0	1	2	23	0	p__Proteobacteria					0.0869565
OTU_1656	0	0	0	0	0	0	0	0	0	0	0	0	0	0	0	0	0	0	0	0	0	23	3	p__Proteobacteria					0.0869565
OTU_1657	0	0	0	0	0	20	0	0	0	6	0	0	0	0	0	0	0	0	0	0	0	0	0	p__Firmicutes					0.0869565
OTU_1658	0	0	0	0	0	23	0	0	0	3	0	0	0	0	0	0	0	0	0	0	0	0	0						0.0869565
OTU_1659	0	0	0	0	0	0	19	7	0	0	0	0	0	0	0	0	0	0	0	0	0	0	0	p__Proteobacteria					0.0869565
OTU_1660	0	0	0	0	0	0	0	0	0	0	19	0	0	0	0	0	0	0	0	0	0	7	0	p__Proteobacteria					0.0869565
OTU_1661	0	0	0	0	0	0	0	0	0	23	0	0	0	0	0	0	0	0	0	0	3	0	0	p__Proteobacteria					0.0869565
OTU_1662	0	0	21	0	0	1	1	2	0	0	0	0	0	0	0	0	0	0	0	0	0	0	0	p__Proteobacteria					0.0869565
OTU_1663	5	1	0	0	0	19	0	0	0	0	0	0	0	0	0	0	0	0	0	0	0	0	0	p__Proteobacteria					0.0869565
OTU_1664	0	0	0	0	1	22	0	2	0	0	0	0	0	0	0	0	0	0	0	0	0	0	0	p__Firmicutes					0.0869565
OTU_1665	0	0	0	0	0	0	0	0	0	0	0	0	0	0	0	0	0	0	0	1	0	20	4	p__Proteobacteria					0.0869565
OTU_1666	0	0	0	0	19	6	0	0	0	0	0	0	0	0	0	0	0	0	0	0	0	0	0	p__Proteobacteria					0.0869565
OTU_1667	0	0	0	0	0	0	0	0	0	0	0	0	0	0	0	12	13	0	0	0	0	0	0	p__Proteobacteria					0.0869565
OTU_1668	0	0	0	0	0	0	0	0	0	3	0	0	0	0	0	0	0	0	1	1	1	18	0	p__Bacteroidetes					0.0869565
OTU_1669	0	0	0	0	0	0	0	0	0	0	0	0	0	0	0	0	0	0	0	1	16	1	6						0.0869565
OTU_1670	0	16	0	0	0	0	1	0	6	0	1	0	0	0	0	0	0	0	0	0	0	0	0	p__Proteobacteria					0.0869565
OTU_1671	0	0	0	0	1	20	0	0	0	0	0	0	0	0	0	0	3	0	0	0	0	0	0	p__Proteobacteria					0.0869565
OTU_1672	0	0	8	0	0	0	0	1	0	0	15	0	0	0	0	0	0	0	0	0	0	0	0	p__Proteobacteria					0.0869565
OTU_1673	1	0	18	0	0	0	0	0	0	5	0	0	0	0	0	0	0	0	0	0	0	0	0	p__Proteobacteria					0.0869565
OTU_1674	0	0	0	0	0	0	0	0	0	22	0	0	0	0	0	0	0	0	0	0	2	0	0	p__Proteobacteria					0.0869565
OTU_1675	0	0	0	0	0	0	22	2	0	0	0	0	0	0	0	0	0	0	0	0	0	0	0	p__Firmicutes					0.0869565
OTU_1676	0	0	0	0	0	4	0	0	0	20	0	0	0	0	0	0	0	0	0	0	0	0	0	p__Actinobacteria					0.0869565
OTU_1677	0	0	0	0	0	18	0	0	0	6	0	0	0	0	0	0	0	0	0	0	0	0	0	p__Firmicutes					0.0869565
OTU_1678	0	0	0	0	0	0	0	0	1	1	0	0	0	0	0	5	15	0	0	1	0	0	0	p__Proteobacteria					0.0869565
OTU_1679	0	0	0	0	0	0	0	0	0	0	0	0	0	0	0	0	0	0	0	1	2	19	1	p__Proteobacteria					0.0869565
OTU_1680	0	0	0	0	0	0	14	0	0	0	0	0	0	0	1	0	0	0	7	0	1	0	0	p__Bacteroidetes					0.0869565
OTU_1681	0	0	0	0	0	13	0	0	0	1	0	0	0	0	0	0	0	0	0	0	0	9	0	p__Actinobacteria					0.0869565
OTU_1682	0	0	0	0	0	0	0	6	0	16	0	0	0	0	0	0	0	0	0	0	0	1	0	p__Proteobacteria					0.0869565
OTU_1683	0	0	0	0	0	0	0	0	0	0	0	0	0	0	0	13	9	0	0	0	1	0	0	p__Proteobacteria					0.0869565
OTU_1684	0	0	0	0	0	0	0	0	0	0	0	0	0	0	0	0	0	0	0	2	0	20	1	p__Proteobacteria					0.0869565
OTU_1685	0	0	19	4	0	0	0	0	0	0	0	0	0	0	0	0	0	0	0	0	0	0	0	p__Proteobacteria					0.0869565
OTU_1686	0	0	0	0	0	0	0	0	0	0	0	0	0	0	0	0	0	0	0	0	2	21	0	p__Actinobacteria					0.0869565
OTU_1687	0	14	0	0	0	0	0	0	0	0	0	0	0	1	5	0	1	0	1	0	0	0	0	p__Firmicutes					0.0869565
OTU_1688	0	0	0	0	0	0	0	0	0	0	0	0	0	0	0	0	3	17	0	0	0	1	1	p__Proteobacteria					0.0869565
OTU_1689	0	0	0	0	0	0	1	6	14	0	1	0	0	0	0	0	0	0	0	0	0	0	0	p__Proteobacteria					0.0869565
OTU_1690	0	0	0	0	0	1	5	16	0	0	0	0	0	0	0	0	0	0	0	0	0	0	0	p__Firmicutes					0.0869565
OTU_1691	0	0	0	0	0	2	0	0	0	19	0	0	0	0	0	0	0	0	0	0	0	1	0	p__Firmicutes					0.0869565
OTU_1692	0	0	0	0	20	0	0	0	0	0	0	0	0	0	0	0	0	0	0	2	0	0	0	p__Actinobacteria					0.0869565
OTU_1693	0	0	0	0	0	0	0	0	0	0	0	0	0	0	0	0	0	0	0	2	0	20	0	p__Proteobacteria					0.0869565
OTU_1694	0	0	5	0	0	0	0	0	0	17	0	0	0	0	0	0	0	0	0	0	0	0	0	p__Proteobacteria					0.0869565
OTU_1695	0	0	0	0	0	0	0	0	0	0	0	0	0	0	0	0	0	0	0	0	0	17	5	p__Proteobacteria					0.0869565
OTU_1696	0	0	0	0	0	0	0	0	0	0	0	0	0	0	0	3	19	0	0	0	0	0	0	p__Proteobacteria					0.0869565
OTU_1697	0	0	0	1	0	0	0	2	1	16	0	0	0	0	0	0	0	0	0	0	0	1	0	p__Proteobacteria					0.0869565
OTU_1698	0	0	16	0	0	2	0	0	0	1	1	0	0	0	0	0	0	0	0	0	1	0	0	p__Proteobacteria					0.0869565
OTU_1699	0	0	0	0	0	0	2	17	0	1	0	0	0	0	0	0	0	0	0	0	0	1	0	p__Proteobacteria					0.0869565
OTU_1700	0	0	0	0	0	0	0	10	0	0	0	0	0	0	1	0	0	0	1	0	0	0	9	p__Bacteroidetes					0.0869565
OTU_1701	0	0	0	0	0	0	0	0	0	0	0	0	0	0	0	0	0	0	0	3	16	1	1	p__Proteobacteria					0.0869565
OTU_1702	1	0	2	17	0	0	1	0	0	0	0	0	0	0	0	0	0	0	0	0	0	0	0	p__Proteobacteria					0.0869565
OTU_1703	15	1	1	0	0	4	0	0	0	0	0	0	0	0	0	0	0	0	0	0	0	0	0	p__Proteobacteria					0.0869565
OTU_1704	0	0	0	0	0	0	0	0	0	17	0	0	1	0	0	0	0	0	0	0	0	0	3	p__Proteobacteria					0.0869565
OTU_1705	0	0	0	0	0	5	0	0	0	15	1	0	0	0	0	0	0	0	0	0	0	0	0	p__Proteobacteria					0.0869565
OTU_1706	0	0	0	0	0	0	0	0	0	18	0	0	0	0	0	0	0	0	1	0	0	0	2	p__Proteobacteria					0.0869565
OTU_1707	0	0	0	0	0	0	0	0	0	0	0	0	0	0	0	6	15	0	0	0	0	0	0	p__Proteobacteria					0.0869565
OTU_1708	0	0	0	0	0	0	0	0	0	13	0	0	0	0	0	0	0	0	0	0	0	8	0	p__Proteobacteria					0.0869565
OTU_1709	0	0	0	0	0	0	0	0	0	0	16	0	0	0	0	0	0	0	0	0	0	0	5	p__Proteobacteria					0.0869565
OTU_1710	0	1	2	0	1	0	13	1	0	1	0	0	0	0	0	0	0	0	0	0	1	0	0	p__Proteobacteria					0.0869565
OTU_1711	0	0	16	0	0	1	1	2	0	0	0	0	0	0	0	0	0	0	0	0	0	0	0	p__Proteobacteria					0.0869565
OTU_1712	1	0	1	0	2	0	0	0	0	0	16	0	0	0	0	0	0	0	0	0	0	0	0	p__Actinobacteria					0.0869565
OTU_1713	0	0	0	0	6	1	0	1	0	0	0	0	0	0	0	0	0	0	0	0	0	0	12	p__Proteobacteria					0.0869565
OTU_1714	0	0	0	0	0	0	0	0	0	15	0	0	0	0	0	0	0	0	0	0	1	4	0	p__Proteobacteria					0.0869565
OTU_1715	0	0	11	0	0	0	0	0	0	0	0	0	0	0	0	0	1	0	0	0	8	0	0	p__Proteobacteria					0.0869565
OTU_1716	12	0	7	0	0	1	0	0	0	0	0	0	0	0	0	0	0	0	0	0	0	0	0	p__Proteobacteria					0.0869565
OTU_1717	0	0	1	0	0	0	0	0	0	0	0	0	0	0	0	13	6	0	0	0	0	0	0	p__Bacteroidetes					0.0869565
OTU_1718	0	0	0	0	0	0	0	0	0	14	0	0	0	0	0	0	0	0	0	0	0	0	6	p__Bacteroidetes					0.0869565
OTU_1719	0	0	0	0	0	0	0	0	0	15	0	0	0	0	0	0	0	0	0	5	0	0	0	p__Bacteroidetes					0.0869565
OTU_1720	0	0	0	0	0	0	0	0	0	0	0	0	0	0	0	0	0	0	0	0	18	0	2	p__Proteobacteria					0.0869565
OTU_1721	0	0	0	0	2	0	0	0	0	18	0	0	0	0	0	0	0	0	0	0	0	0	0	p__Proteobacteria					0.0869565
OTU_1722	0	0	0	0	0	0	0	0	0	0	0	0	0	0	17	0	0	0	0	0	0	0	3	p__Actinobacteria					0.0869565
OTU_1723	0	0	0	0	0	0	0	0	0	0	0	0	0	0	0	5	15	0	0	0	0	0	0	p__Proteobacteria					0.0869565
